# Supplementary material for: Regioselective synthesis of novel nitroso-pyrazolylquinoxalines via HOAc-mediated cyclocondensation of 2-hydroxyimino-1,3-diketones with hydrazinylquinoxalines
Source: Royal Society of Chemistry journal article supplement (doi:10.1039/d3ob00356f), 2023-01-01

## Supporting Information

# Regioselective Synthesis of Novel Nitroso-pyrazolylquinoxalines *via* HOAc-Mediated Cyclocondensation of 2-Hydroxyimino-1,3-diketones with Hydrazinylquinoxalines

Pavel S. Bobrov\*<sup>[a]</sup>, Sergei D. Kirik<sup>[b,c]</sup>, Ivan V. Peterson<sup>[c]</sup>, Georgii A. Suboch<sup>[a]</sup>.

[a] Department of Organic Chemistry and Technology of Organic Substances, Reshetnev Siberian State University of Science and Technology, 31, Krasnoyarskii Rabochii prospekt, Krasnoyarsk 660037, Russian Federation

E-mail: [pavel.bobrov96@mail.ru](mailto:pavel.bobrov96@mail.ru)

[b] Department of Inorganic and Physical Chemistry, Siberian Federal University, 79, Svobodny Av., Krasnoyarsk 660041, Russian Federation

[c] Laboratory of Molecular Spectroscopy and Analysis, Institute of Chemistry and Chemical Technology SB RAS, Federal Research Center 'Krasnoyarsk Science Center SB RAS', 50/24 Akademgorodok, Krasnoyarsk 660036, Russian Federation

## Table of Contents

|                               |      |
|-------------------------------|------|
| 1. General procedure          | S-2  |
| 2. References                 | S-9  |
| 3. NMR spectra                | S-10 |
| 4. X-Ray crystallography data | S-67 |
| 5. CheckCIF report            | S-69 |

## General procedure

### Preparation of the starting materials. Synthesis of 2-Hydroxyimino-1,3-diketones 2a-2k [1].

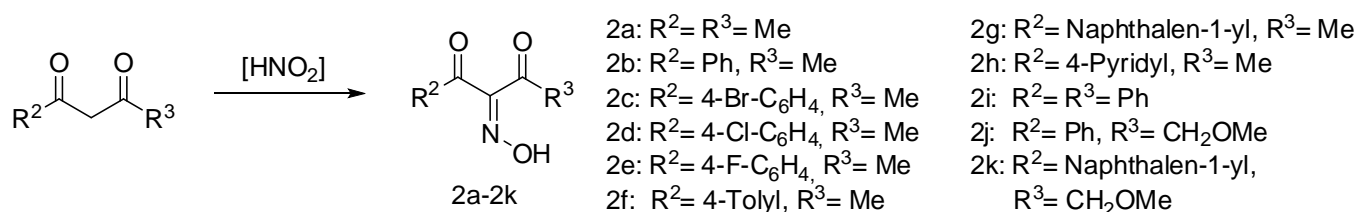

**Synthesis of 3-(hydroxyimino)pentane-2,4-dione (2a).** Finely crushed ice (340 g), concentrated hydrochloric acid (60 ml), and acetylacetone (50.21 g, 501.5 mmol) were placed into a beaker equipped with a mechanical stirrer and an ice bath. Sodium nitrite (35 g, 507 mmol) was added in portions to the reaction mass with effective stirring at 0-5 °C. After sodium nitrite was loaded, the reaction mixture was stirred for 30 minutes, the resulting white precipitate was filtered off, washed with cold water (20 ml) and dried. Additional 3-hydroxyiminopentan-2,4-dione can be isolated by salting out the filtrate with NaCl (125 g). Purification of 3-hydroxyiminopentan-2,4-dione was carried out by recrystallization from ethyl acetate (55 ml). Yield 51.75 g (80%), white crystals, M.p. = 72-74 °C.

**Synthesis of 2-(hydroxyimino)-1-phenylbutane-1,3-dione (2b).** Sodium nitrite (3.6 g, 52.2 mmol, 1.2 eq.) was slowly added to the solution of 1-phenylbutane-1,3-dione (7.0 g, 43.5 mmol, 1 eq.) in acetic acid (20 ml) at 14 °C. After 2 h the reaction mixture was poured in water, filtered off the precipitate of 2-(hydroxyimino)-1-phenylbutane-1,3-dione, washed with water and dried in air. Yield 6.92 g (84%), white crystals, M.p. = 124-126 °C (EtOH/H<sub>2</sub>O).

**Synthesis of 1-(4-bromophenyl)-2-(hydroxyimino)butane-1,3-dione (2c).** Sodium nitrite (2.15 g, 23.3 mmol, 1.6 eq.) was slowly added to the solution of 1-(4-bromophenyl)butane-1,3-dione (4.68 g, 19.4 mmol, 1 eq.) in acetic acid (46 ml) at 14 °C. After 3 h the reaction mixture was poured in water, filtered off the precipitate of 1-(4-bromophenyl)-2-(hydroxyimino)butane-1,3-dione, washed with water and dried in air. Yield 4.28 g (82 %), white crystals, M.p. = 162 °C (EtOH/H<sub>2</sub>O).

**Synthesis of 1-(4-chlorophenyl)-2-(hydroxyimino)butane-1,3-dione (2d).** Sodium nitrite (0.632 g, 9.2 mmol, 1.2 eq.) was slowly added to the solution of 1-(4-chlorophenyl)butane-1,3-dione (1.5 g, 7.6 mmol, 1 eq.) in acetic acid (25 ml) at 14 °C. After 2.5 h the reaction mixture was poured in water, filtered off the precipitate of 1-(4-chlorophenyl)-2-(hydroxyimino)butane-1,3-dione, washed with water and dried in air. Yield 1.24 g (72 %), light yellow crystals, M.p. = 160-161 °C (EtOH/H<sub>2</sub>O).

**Synthesis of 1-(4-fluorophenyl)-2-(hydroxyimino)butane-1,3-dione (2e).** Sodium nitrite (2.51 g, 36.38 mmol) was slowly added to the solution of 1-(4-fluorophenyl)butane-1,3-dione (5.467 g, 30.37 mmol) in acetic acid (30 ml) at 14 °C. After 2 h the reaction mixture was poured in cold water, filtered off the precipitate of 1-(4-fluorophenyl)-2-(hydroxyimino)butane-1,3-dione, washed with water and dried in air. Yield 5.41 g (85 %), white crystals, M.p. = 144-146 °C (EtOH).

**Synthesis of 2-(hydroxyimino)-1-p-tolylbutane-1,3-dione (2f).** Sodium nitrite (4.21 g, 61 mmol, 1.2 eq.) was slowly added to the solution of 1-p-tolylbutane-1,3-dione (8.95 g, 50.9 mmol, 1 eq.) in acetic acid (25 ml) at 14 °C. After 3 h the reaction mixture was poured in water (100 ml), the precipitate of 2-(hydroxyimino)-1-p-tolylbutane-1,3-dione was filtered off, washed with water and dried in air. Yield 9.17 g (88%), white crystals, M.p. = 154-156 °C (EtOH/H<sub>2</sub>O).

**Synthesis of 2-(hydroxyimino)-1-(naphthalen-1-yl)butane-1,3-dione (2g).** Sodium nitrite (2.95 g, 42.7 mmol, 1.2 eq.) was slowly added to the solution of 1-(naphthalen-1-yl)butane-1,3-dione (7.55 g, 35.6 mmol, 1 eq.) in acetic acid (90 ml) at 14 °C. After 4 h the reaction mixture was poured in water (150 ml), filtered off beige precipitate of 2-(hydroxyimino)-1-(naphthalen-1-yl)butane-1,3-dione, washed with water and dried in air. Yield 7.98 g (93 %), beige crystals, M.p. = 166-167 °C (EtOH/H<sub>2</sub>O).

**Synthesis of 2-(hydroxyimino)-1,3-diphenylpropane-1,3-dione (2i).** A solution of 1,3-diphenylpropane-1,3-dione (20.0 g, 89.29 mmol) in chloroform (60 mL) was placed into a beaker equipped with a mechanical stirrer, cooled to 17°C, and then freshly distilled isoamyl nitrite (12.0 g, 113.21 mmol) and absolute ethanol (2 ml) saturated with dry hydrogen chloride were added in 2 portions. The reaction mixture was stirred for 1 h, then diluted with hexane (60 ml), the precipitate was filtered off, washed with hexane (20 ml) and dried. Yield 19.00 g (84%), white crystals, M.p. = 146 °C [2].

**Synthesis of 2-(hydroxyimino)-4-methoxy-1-phenylbutane-1,3-dione (2j).** Sodium nitrite (5.84 g, 84.63 mmol) was slowly added to the solution of 4-methoxy-1-phenylbutane-1,3-dione (14.77 g, 76.94 mmol) in acetic acid (60 ml) at 14 °C. After 3

h the reaction mixture was poured in water (250 ml), the precipitate of 2-(hydroxyimino)-4-methoxy-1-phenylbutane-1,3-dione was filtered off, washed with water and dried in air. Yield 12.373 g (73%), beige crystals, M.p. = 129-130 °C.

**Synthesis of 2-(hydroxyimino)-4-methoxy-1-(naphthalen-1-yl)butane-1,3-dione (2k).** Sodium nitrite (3.795 g, 55.00 mmol) was slowly added to the solution of 4-methoxy-1-(naphthalen-1-yl)butane-1,3-dione (10.635 g, 43.95 mmol) in acetic acid (50 ml) at 14 °C. After 3 h the reaction mixture was poured in water (250 ml), the precipitate of 2-(hydroxyimino)-4-methoxy-1-(naphthalen-1-yl)butane-1,3-dione was filtered off, washed with water and dried in air. Yield 10.38 g (86%), beige crystals, M.p. = 152-153 °C.

**General procedure for the synthesis of hydrazone intermediates 3ab-3ag and 5-hydroxypyrazoline intermediate 3ah [3].**

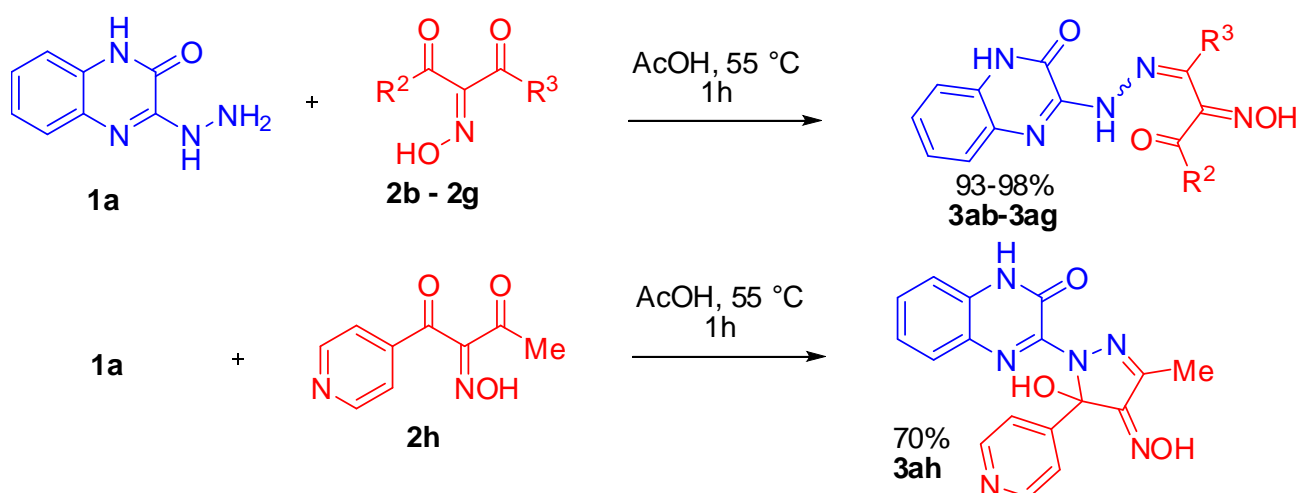

The mixture of 3-hydrazinylquinoxalin-2(1H)-one **1a** (0.4 g, 2.27 mmol, 1.0 eq), 2-(hydroxyimino)-1,3-dione **2b-h** (2.27 mmol, 1.0 eq) and glacial acetic acid (7 mL) was stirred during 1 h at 50-55 °C. The reaction mixture was cooled, the resulting precipitate was filtered off, washed with 1 ml of acetic acid, 20 ml of water, and dried. Yields 70-99%, yellow or beige solids. Physical, spectral data and structure for hydrazones 3aa-3ag, 5-hydroxypyrazoline 3ah were described in our recent report [3].

## Gram-scale synthesis of nitrosopyrazole 4aa

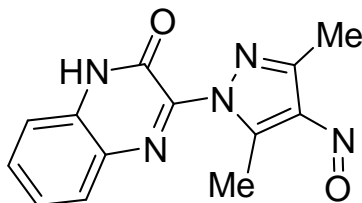

3-Hydrazinylquinoxalin-2(1H)-one **1a** (5.18 g, 29.4 mmol, 1.0 eq) was dissolved in boiling ethanol (1150 mL), the resulting hot saturated solution was cooled to 60 °C, then 3-(hydroxyimino)pentane-2,4-dione **2a** (4.00 g, 31 mmol, 1.05 eq) and hydrochloric acid (0.2 mL) was added. The resulting solution was stirred for 2 h without heating and then allowed to stand for 72 h. The resulting green crystals were filtered off, washed with ethanol (15 mL) and dried in air. Green crystals, yield 6.25 g (79%); mp 216 °C (dec.)

## General procedure for the synthesis of nitrosopyrazoles 4ab-4ah

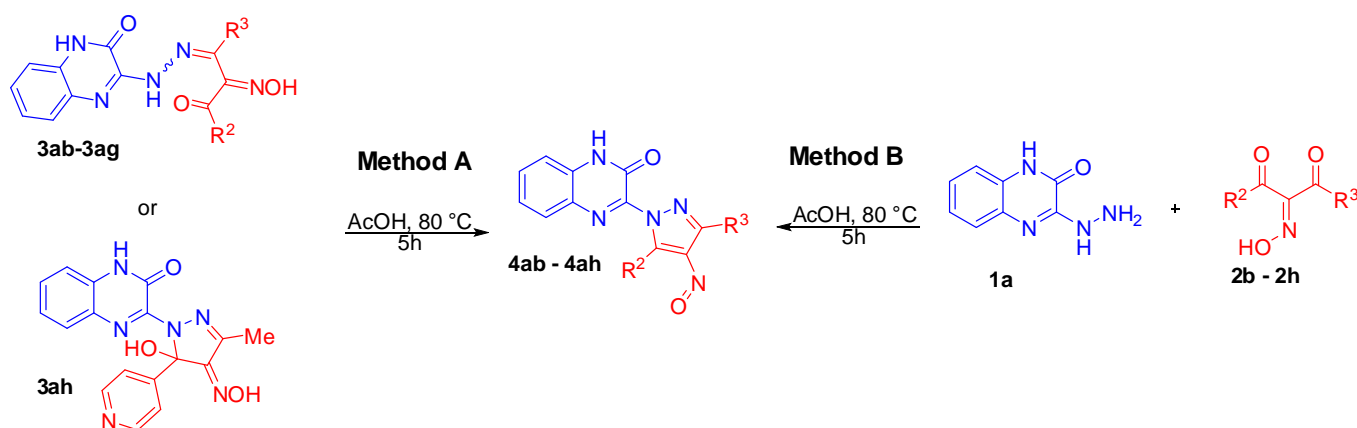

Method A. The intermediate **3ab-3ah** (0.55 mmol) was suspended in glacial acetic acid (6 mL) and stirred during 5 h at 80 °C. The reaction mixture was filtered, the resulting green filtrate was poured into cold water (35 mL), then sodium chloride (0.6 g) was added and stirred for 1 min. The precipitate was filtered off, washed with water (10 mL) and dried in air. The obtained solid was purified by column chromatography on silica gel (70-230 mesh) using toluene - acetonitrile as eluent (gradient 15:1 - 10:1) to yield the desired product.

Method B. The mixture of 3-hydrazinylquinoxalin-2(1H)-one **1a** (0.097g, 0.55 mmol, 1.0 eq), 2-(hydroxyimino)-1,3-dione **2** (0.55 mmol, 1.0 eq) and glacial acetic acid (6 mL) was stirred during 5 h at 80 °C. The reaction mixture was filtered, the resulting green filtrate was poured into cold water (35 mL), then sodium chloride (0.6 g) was added and stirred during 1 min. The precipitate was filtered off, washed with water

(10 mL) and dried in air. The obtained solid was purified by column chromatography on silica gel (70-230 mesh) using toluene - acetonitrile as eluent (gradient 15:1 - 10:1) to yield the desired product.

**Table 1.** Synthesis of nitrosopyrazoles **4ab-4ah**

| compd      | R <sup>2</sup>                     | R <sup>3</sup> | yield <sup>[a]</sup> , % |          | mp, °C<br>(EtOH) |
|------------|------------------------------------|----------------|--------------------------|----------|------------------|
|            |                                    |                | Method A                 | Method B |                  |
| <b>4ab</b> | Ph                                 | Me             | 33                       | 39       | 237-240 (dec.)   |
| <b>4ac</b> | 4-Br-C <sub>6</sub> H <sub>4</sub> | Me             | 50                       | 49       | 236-237 (dec.)   |
| <b>4ad</b> | 4-Cl-C <sub>6</sub> H <sub>4</sub> | Me             | 35                       | 37       | 222-224 (dec.)   |
| <b>4ae</b> | 4-F-C <sub>6</sub> H <sub>4</sub>  | Me             | 58                       | 40       | 204-207          |
| <b>4af</b> | 4-Tolyl                            | Me             | 54                       | 47       | 218-220 (dec.)   |
| <b>4ag</b> | Naphthalen-1-yl                    | Me             | 39                       | 44       | 200-204 (dec.)   |
| <b>4ah</b> | 4-Pyridyl                          | Me             | 25                       | traces   | 251-253 (dec.)   |

[a] Isolated yield.

### Gram-scale synthesis of nitrosopyrazole **4ai**

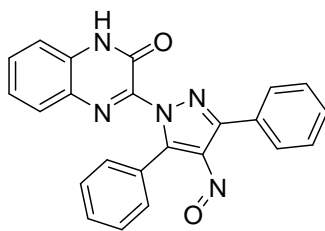

The mixture of 3-hydrazinylquinoxalin-2(1H)-one **1a** (3.872 g, 22 mmol, 1.0 eq), 2-(hydroxyimino)-1,3-diphenylpropane-1,3-dione **2i** (6.123 g, 24.2 mmol, 1.1 eq), acetic acid (40 mL) and TFA (0.2 mL) was stirred during 96 h at 25°C. The resulting yellow precipitate was filtered off and washed with acetic acid (5 mL). Yellow solid was suspended in acetic acid (250 mL) and stirred during 5 hours at 80°C. The hot mixture was filtered and the green filtrate was allowed to stand at 25 °C during 24 h. After the crystallization was completed, the precipitate was filtered off, washed with acetic acid (2 mL), and dried in air. Light green solid, yield 1.73 g (20 %); mp 238-240 °C (dec.) (EtOH).

## General procedure for nitrosopyrazoles **4bb-4bf**, **4bj**, **4bk** synthesis

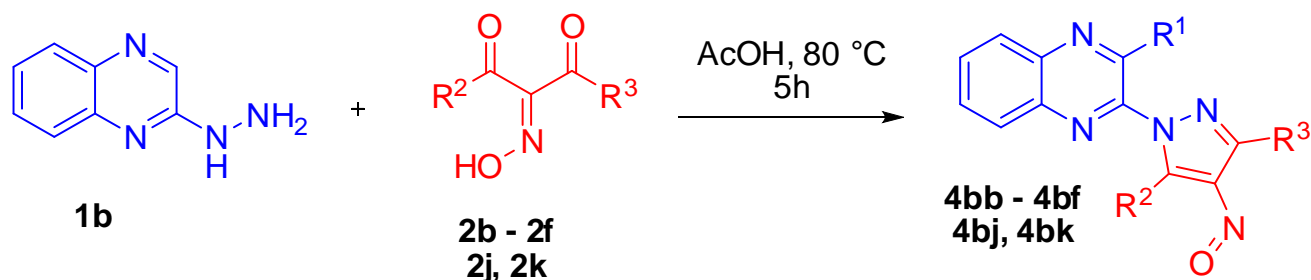

The mixture of 2-hydrazinylquinoxaline **1b** (0.088g, 0,55 mmol, 1.0 eq), 2-(hydroxyimino)-1,3-dione **2** (0.55 mmol, 1.0 eq) and glacial acetic acid (2 mL) was stirred during 1 h at 25 °C. Acetic acid (4 mL) was added to the resulting yellow suspension. The reaction mixture was heated to 80 °C and stirred during 5 h. After cooling down to room temperature, the resulting green solution was poured into water (25 mL) and extracted (CHCl<sub>3</sub>, 2\*10 mL). The combined organic layers were washed with 5% aqueous NaHCO<sub>3</sub> (10 mL) then brine (10 mL) and dried over Na<sub>2</sub>SO<sub>4</sub>. The resulting extract was evaporated and chromatographed on a silica gel column (70-230 mesh) using toluene-acetonitrile as eluent (gradient 25:0 - 25:1) to yield the desired product.

**Table 2.** Synthesis of nitrosopyrazoles **4bb-4bf**, **4bj**, **4bk**

| compd      | R <sup>2</sup>                     | R <sup>3</sup>      | yield <sup>[a]</sup> , % | mp, °C                      |
|------------|------------------------------------|---------------------|--------------------------|-----------------------------|
| <b>4bb</b> | Ph                                 | Me                  | 78                       | 156-158 (CCl <sub>4</sub> ) |
| <b>4bc</b> | 4-Br-C <sub>6</sub> H <sub>4</sub> | Me                  | 74                       | 160-162 (CCl <sub>4</sub> ) |
| <b>4bd</b> | 4-Cl-C <sub>6</sub> H <sub>4</sub> | Me                  | 65                       | 160-162 (CCl <sub>4</sub> ) |
| <b>4be</b> | 4-F-C <sub>6</sub> H <sub>4</sub>  | Me                  | 64                       | 148-150 (CCl <sub>4</sub> ) |
| <b>4bf</b> | 4-Tolyl                            | Me                  | 65                       | 132-134 (CCl <sub>4</sub> ) |
| <b>4bj</b> | Ph                                 | CH <sub>2</sub> OMe | 86                       | 106-108 (CCl <sub>4</sub> ) |
| <b>4bk</b> | Naphthalen-1-yl                    | CH <sub>2</sub> OMe | 53                       | 140-142 (CCl <sub>4</sub> ) |

[a] Isolated yield.

Substrates screening showed the reaction was tolerant to sterically bulky substituents (**4ag**, **4bk**). At the same time, the introduction of electron-donating substituents into hydrazinylquinoxaline should increase the nucleophilicity of the amino group. Taking this into account, we assume successful cyclocondensation when R<sup>1</sup> is an alkyl or an aryl group.

### Oxidation of nitrosopyrazoles

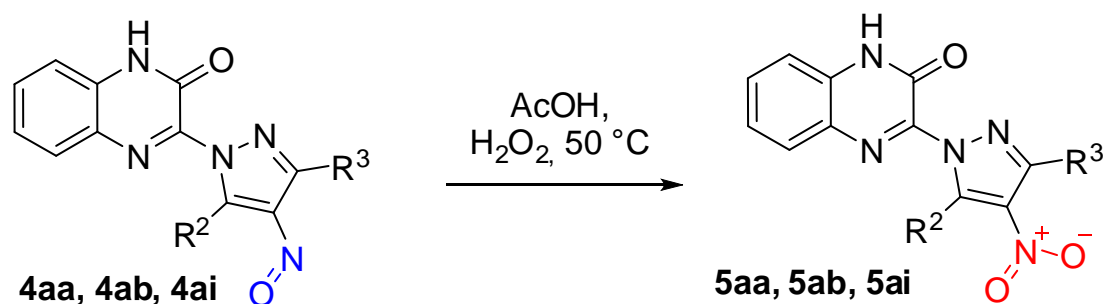

### Oxidation of 4aa

The mixture of **4aa** (0.162 g, 0.6 mmol), acetic acid (20 mL) and hydrogen peroxide 30% (2 mL) was stirred during 4 h at 50 °C, then the reaction mixture was evaporated to 10 mL and poured into cold water (30 mL). The resulting precipitate was filtered off, washed with water and dried. Beige solid, yield 0.045 g (23%); mp 295-300 °C (dec.) (EtOH).

### Oxidation of 4ab

Hydrogen peroxide 30% (2 mL) was added dropwise to a solution of compound **4ab** (0.2 g, 0.6 mmol) in acetic acid (17 mL) and stirred during 4 h at 50 °C, then the reaction mixture was evaporated to 10 mL and poured into cold water (30 mL). The resulting precipitate was filtered off, washed with water, and recrystallized from ethanol. Yellow solid, yield 0.15 g (71%); mp 222-224 °C (EtOH).

### Oxidation of 4ai

Hydrogen peroxide 30% (2 mL) was added dropwise to a solution of compound **4ai** (0.237 g, 0.6 mmol) in acetic acid (20 mL) and stirred during 4 h at 50 °C, then the reaction mixture was evaporated to 10 mL and poured into cold water (30 mL). The resulting precipitate was filtered off, washed with water, and recrystallized from ethanol. Beige solid, yield 0.134 g (54%); mp 242-244 °C (EtOH).



## REFERENCES

[1] P.S. Bobrov, S.D. Kirik, A.V. Lyubyashkin, G.A. Suboch, M.S. Tovbis. Molecular packing peculiarities in 2-hydroxyimino-1,3-diketones by X-ray powder diffraction. *Butlerov Communications B.* **2022**, 3 (2), Id.1. <https://doi.org/10.37952/ROI-jbc-B/22-3-2-1>

[2] R. Neufville, H. Pechmann. Ueber das Diphenyltriketon. *Chem. Ber.* **1890**, 23, 3375-3387. <https://doi.org/10.1002/cber.189002302302>

[3] a) P.S. Bobrov, E.S. Semichenko, A.A. Kondrasenko, G.A. Suboch. Interaction of 3-Hydrazinylquinoxaline-2(1H)-one with 2-Hydroxyimino-1,3-dicarbonyl Compounds. *Zhurnal Organicheskoi Khimii*, **2022**, 58(11), 1214–1223. <https://doi.org/10.31857/S0514749222110106>; b) P.S. Bobrov, E.S. Semichenko, A.A. Kondrasenko, G.A. Suboch. Reaction of 3-Hydrazinylquinoxaline-2(1H)-one with 2-Hydroxyimino-1,3-dicarbonyl Compounds. *Russ. J. Org. Chem.*, **2022**, 58 (11), 1628-1636. <https://doi.org/10.1134/S1070428022110100>

# NMR spectra copies

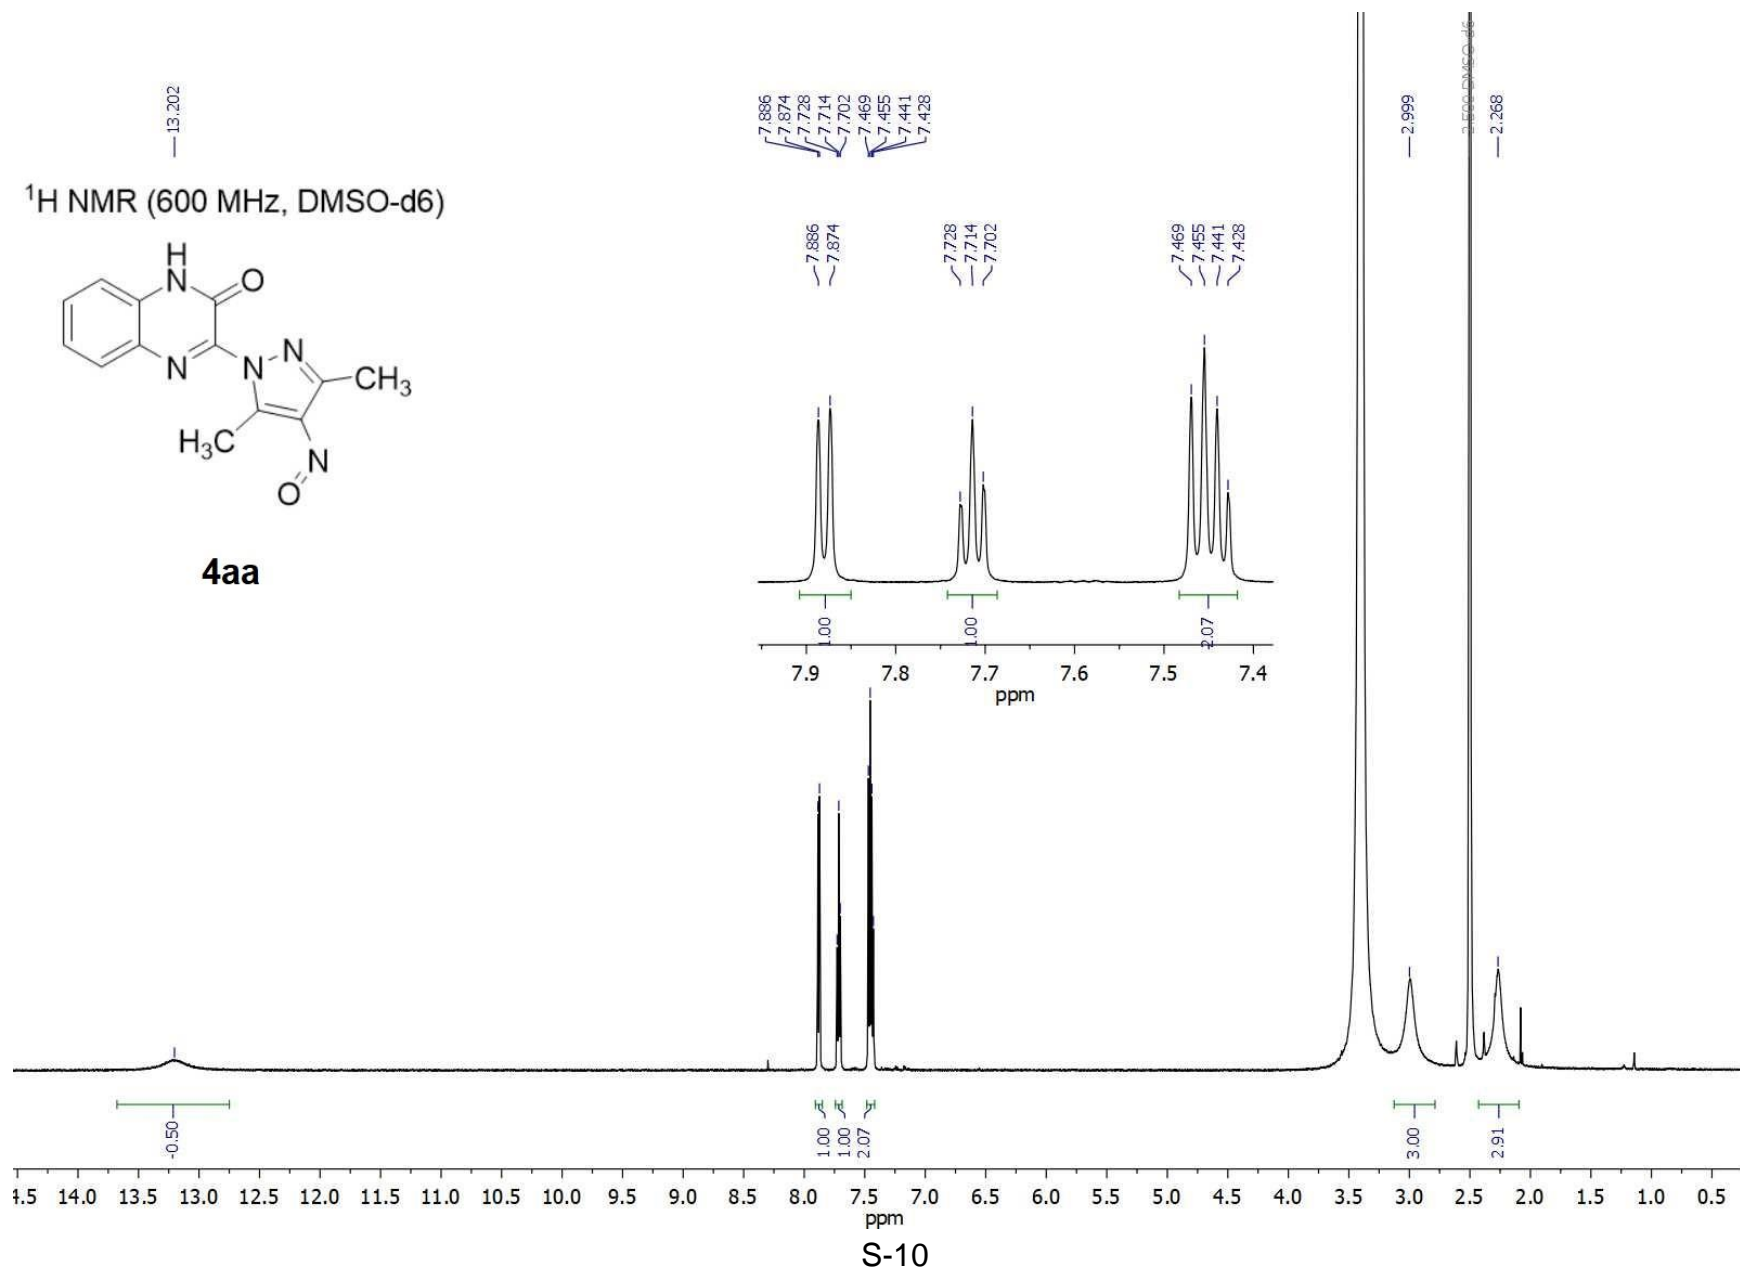

<sup>13</sup>C NMR (150 MHz, DMSO-d6)

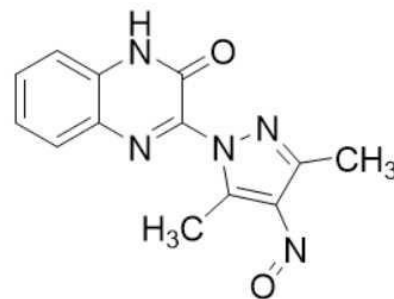

4aa

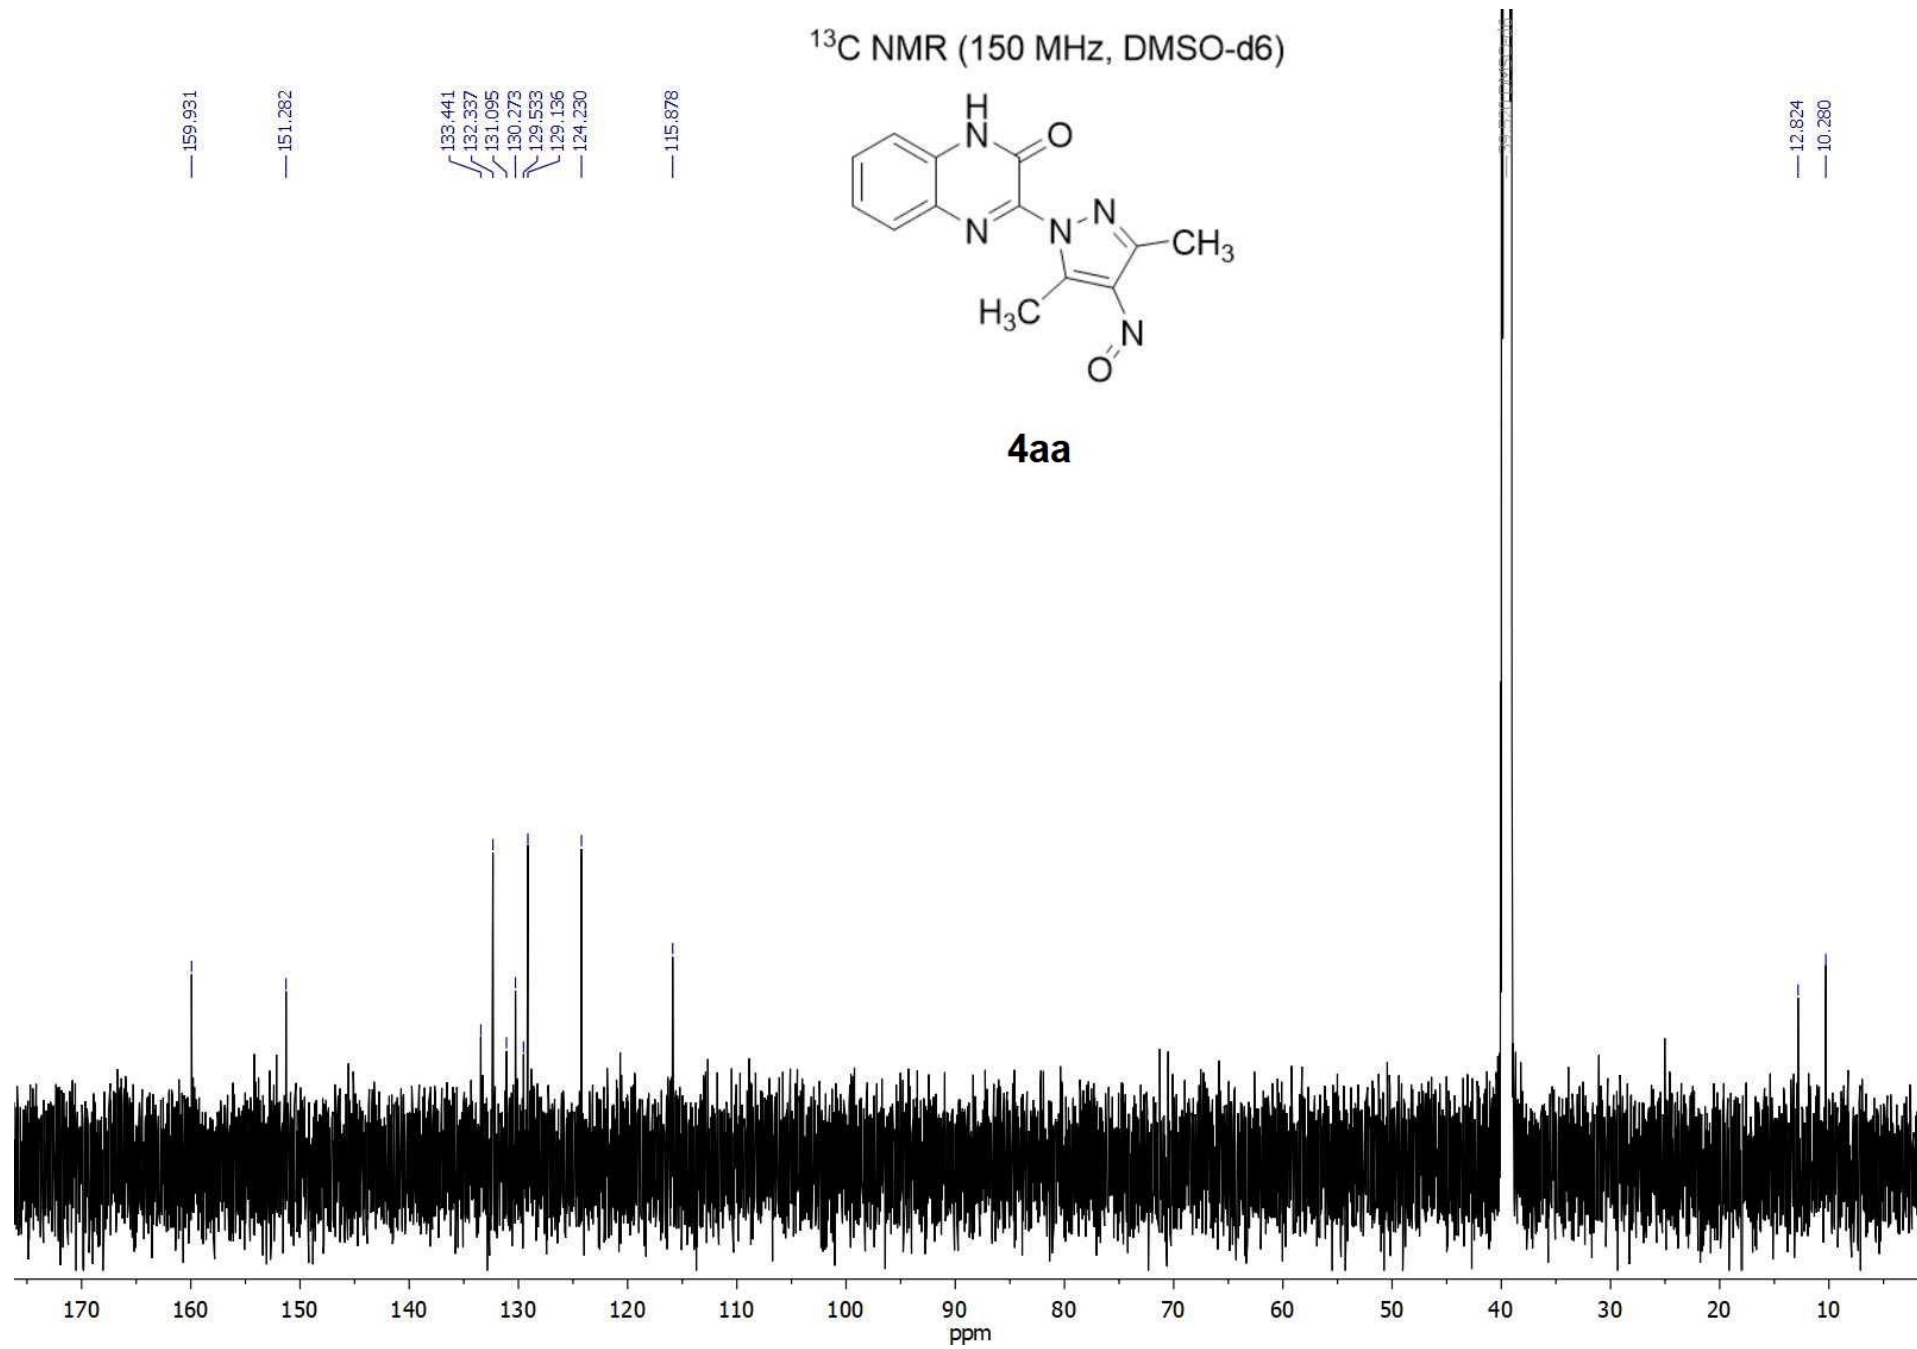

<sup>1</sup>H NMR (600 MHz, DMSO-d6)

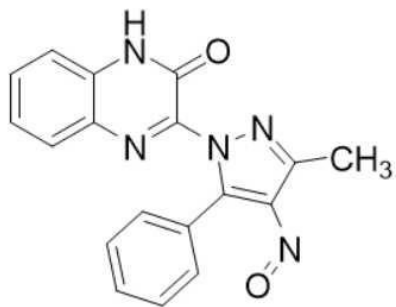

**4ab**

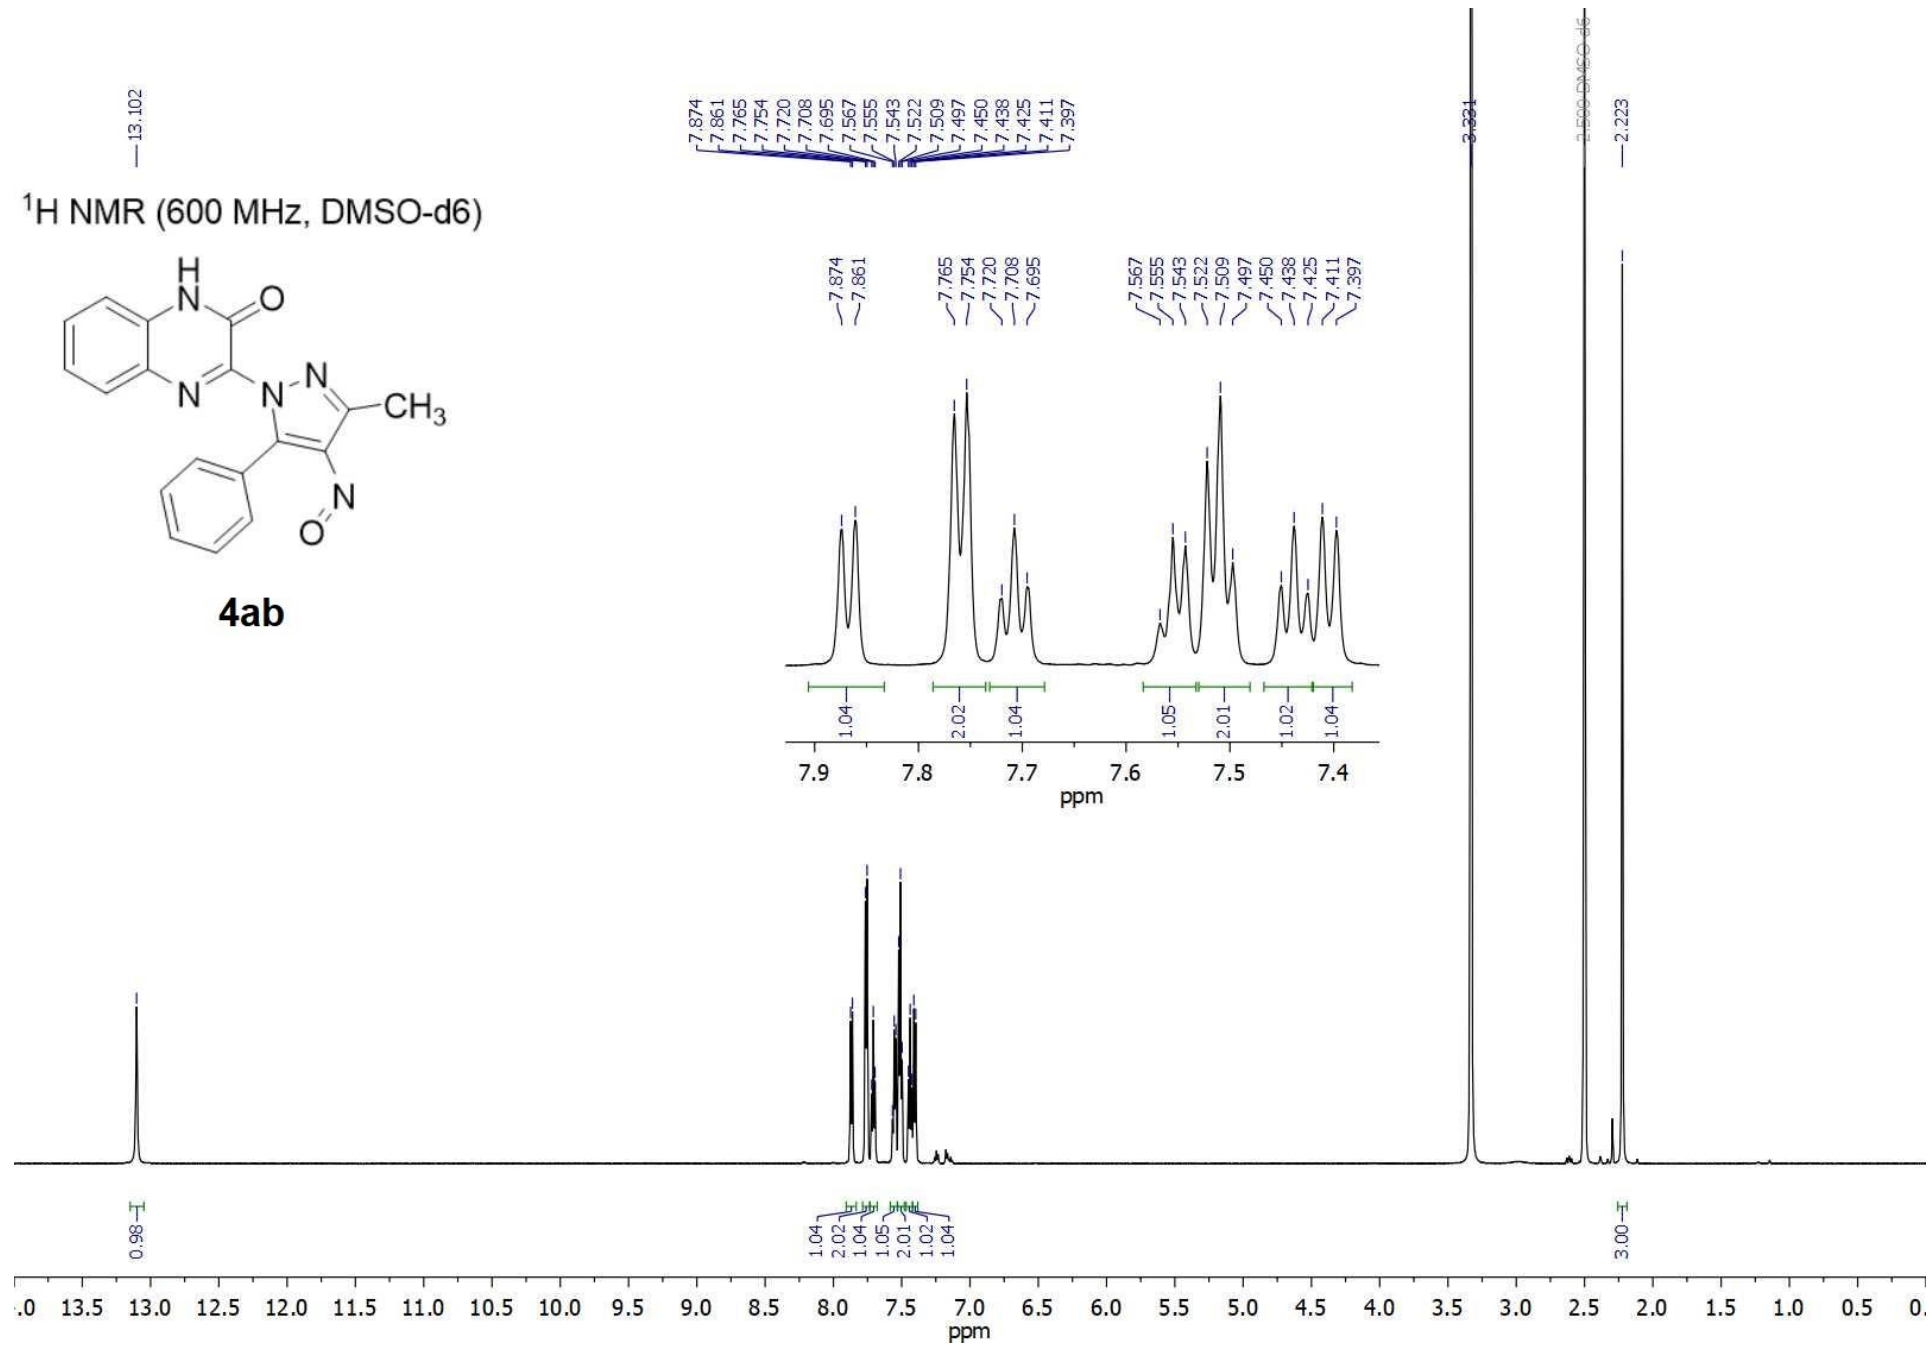

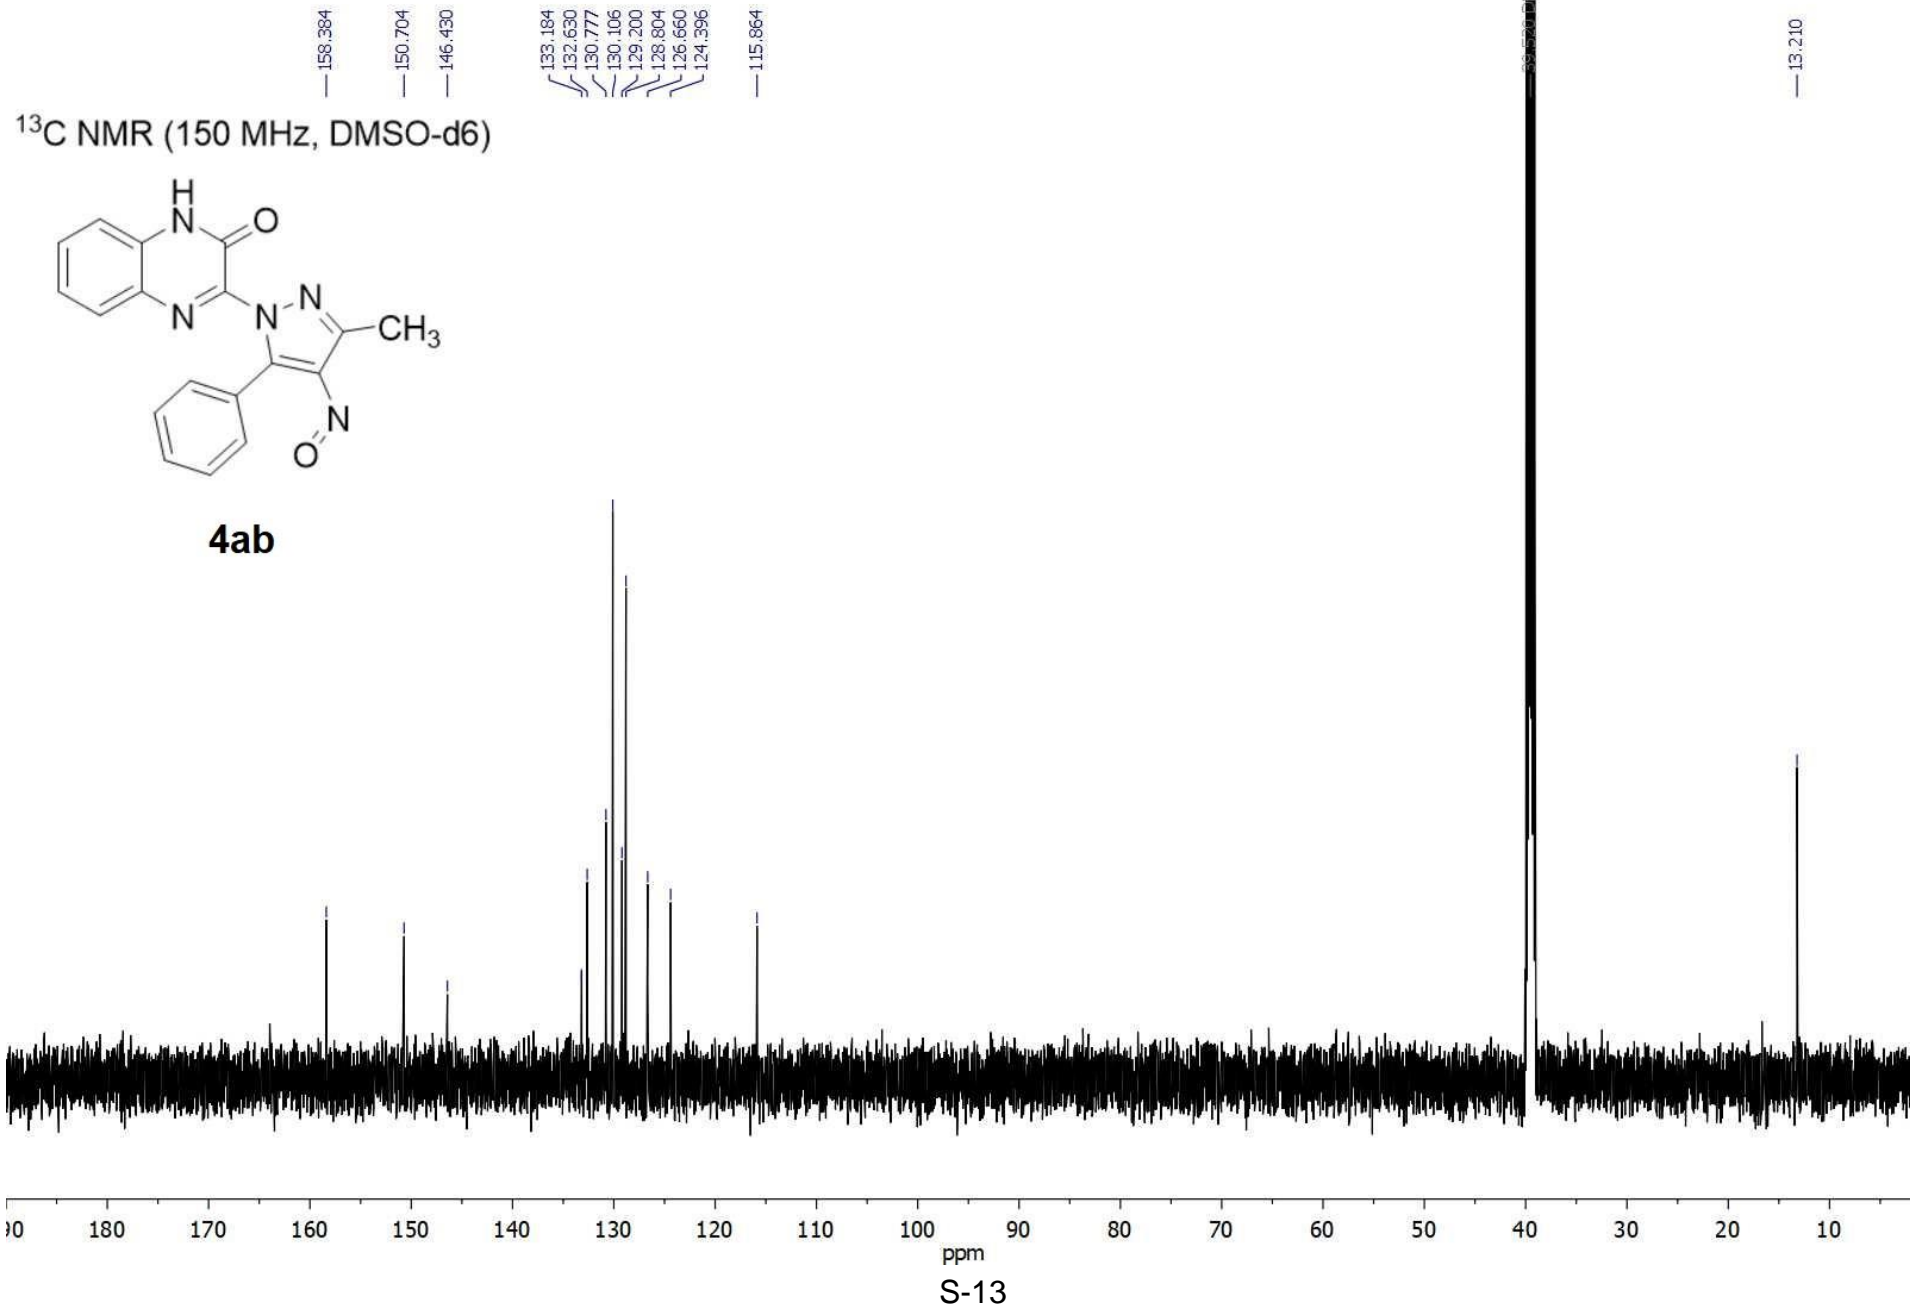

HSQC (DMSO-d6)

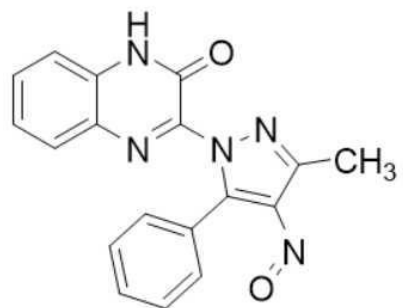

4ab

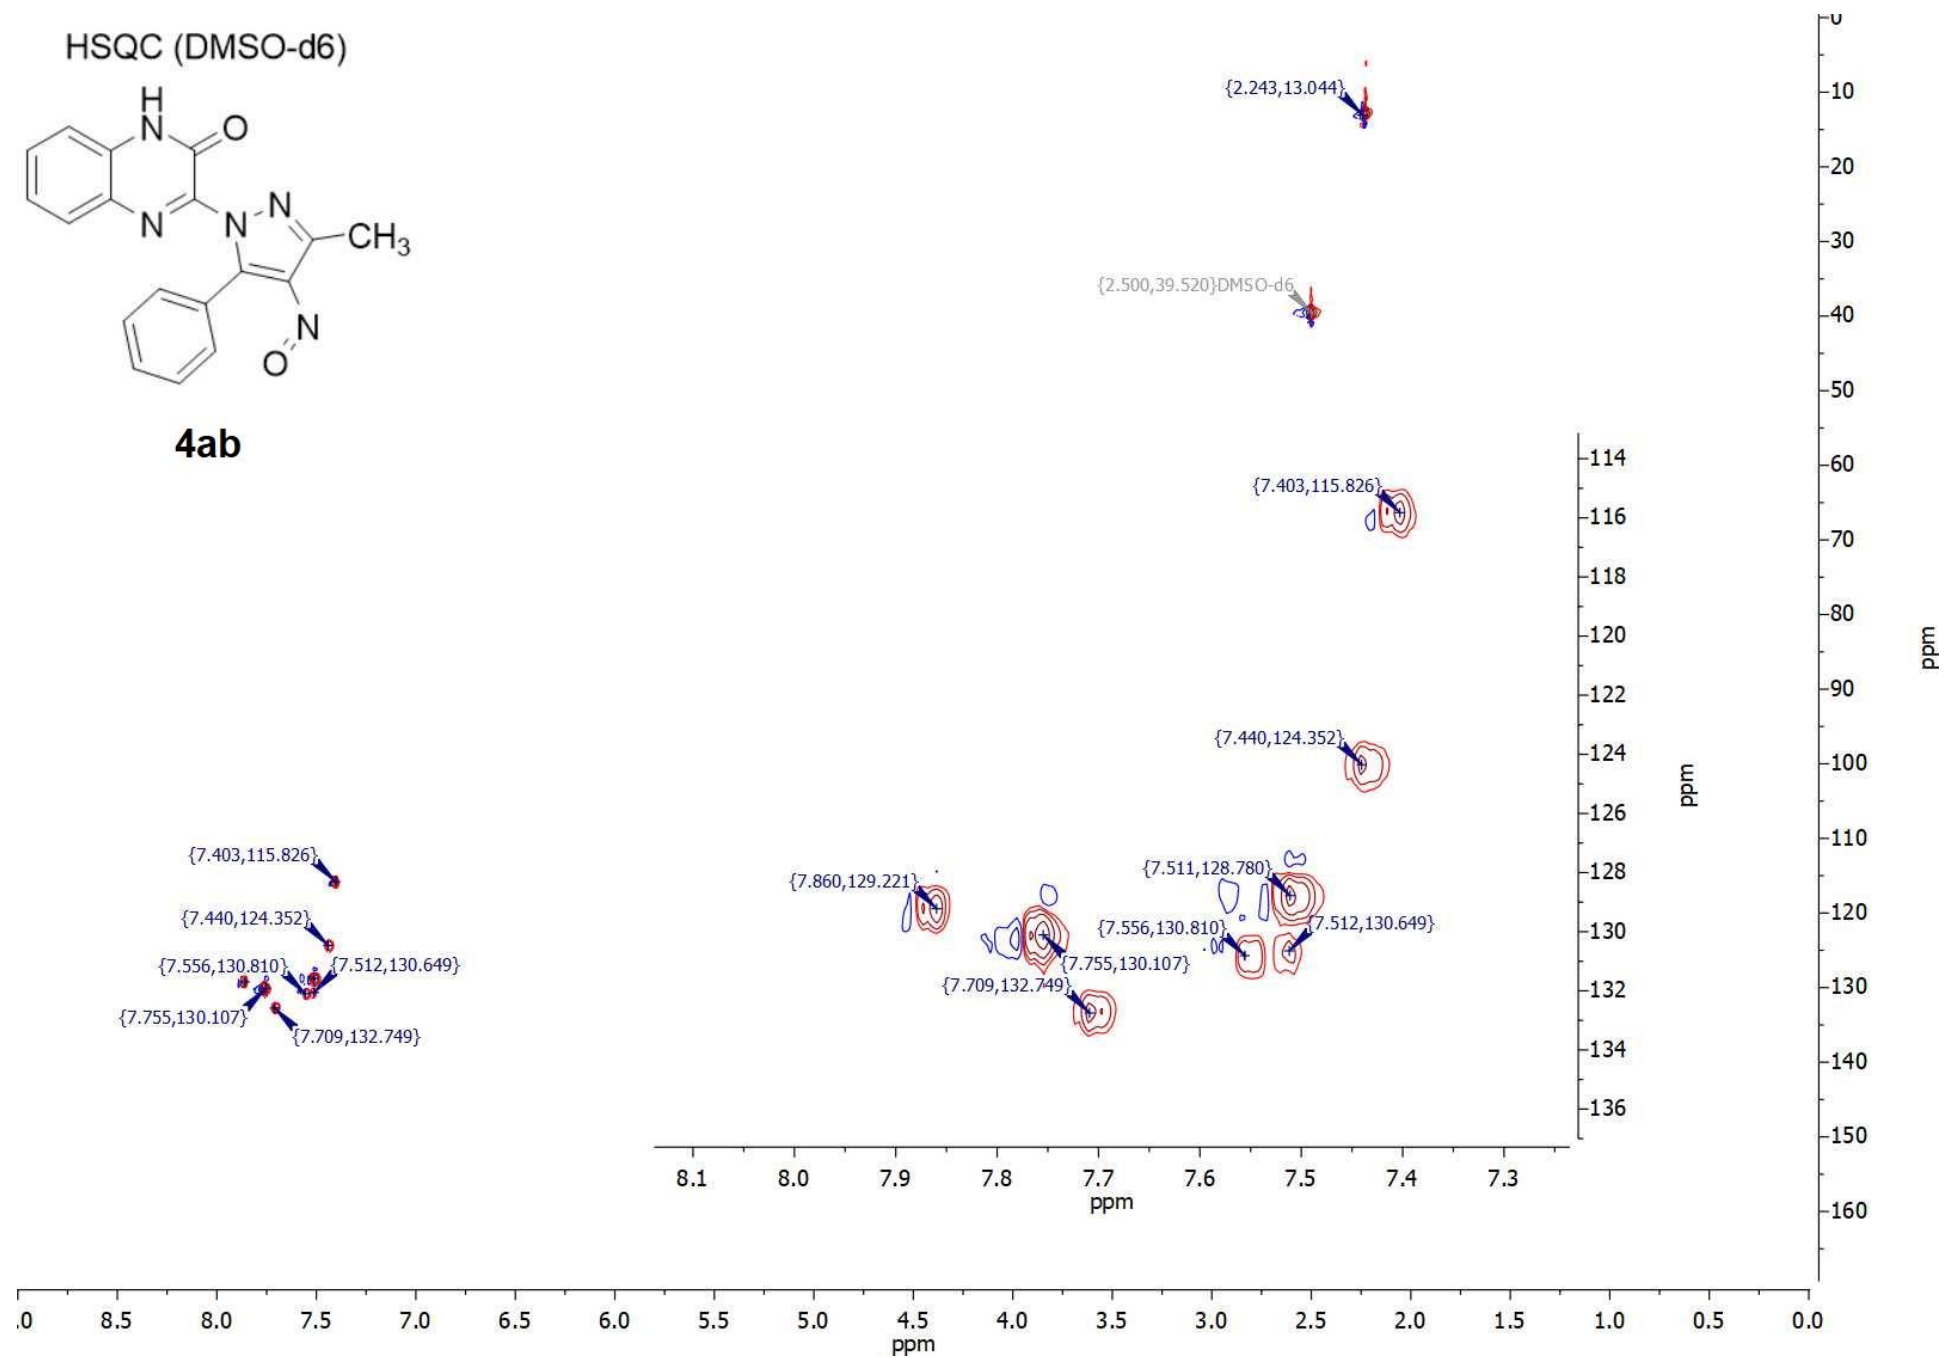

<sup>1</sup>H NMR (600 MHz, DMSO-d6)

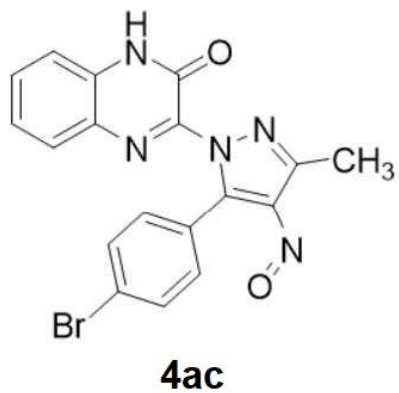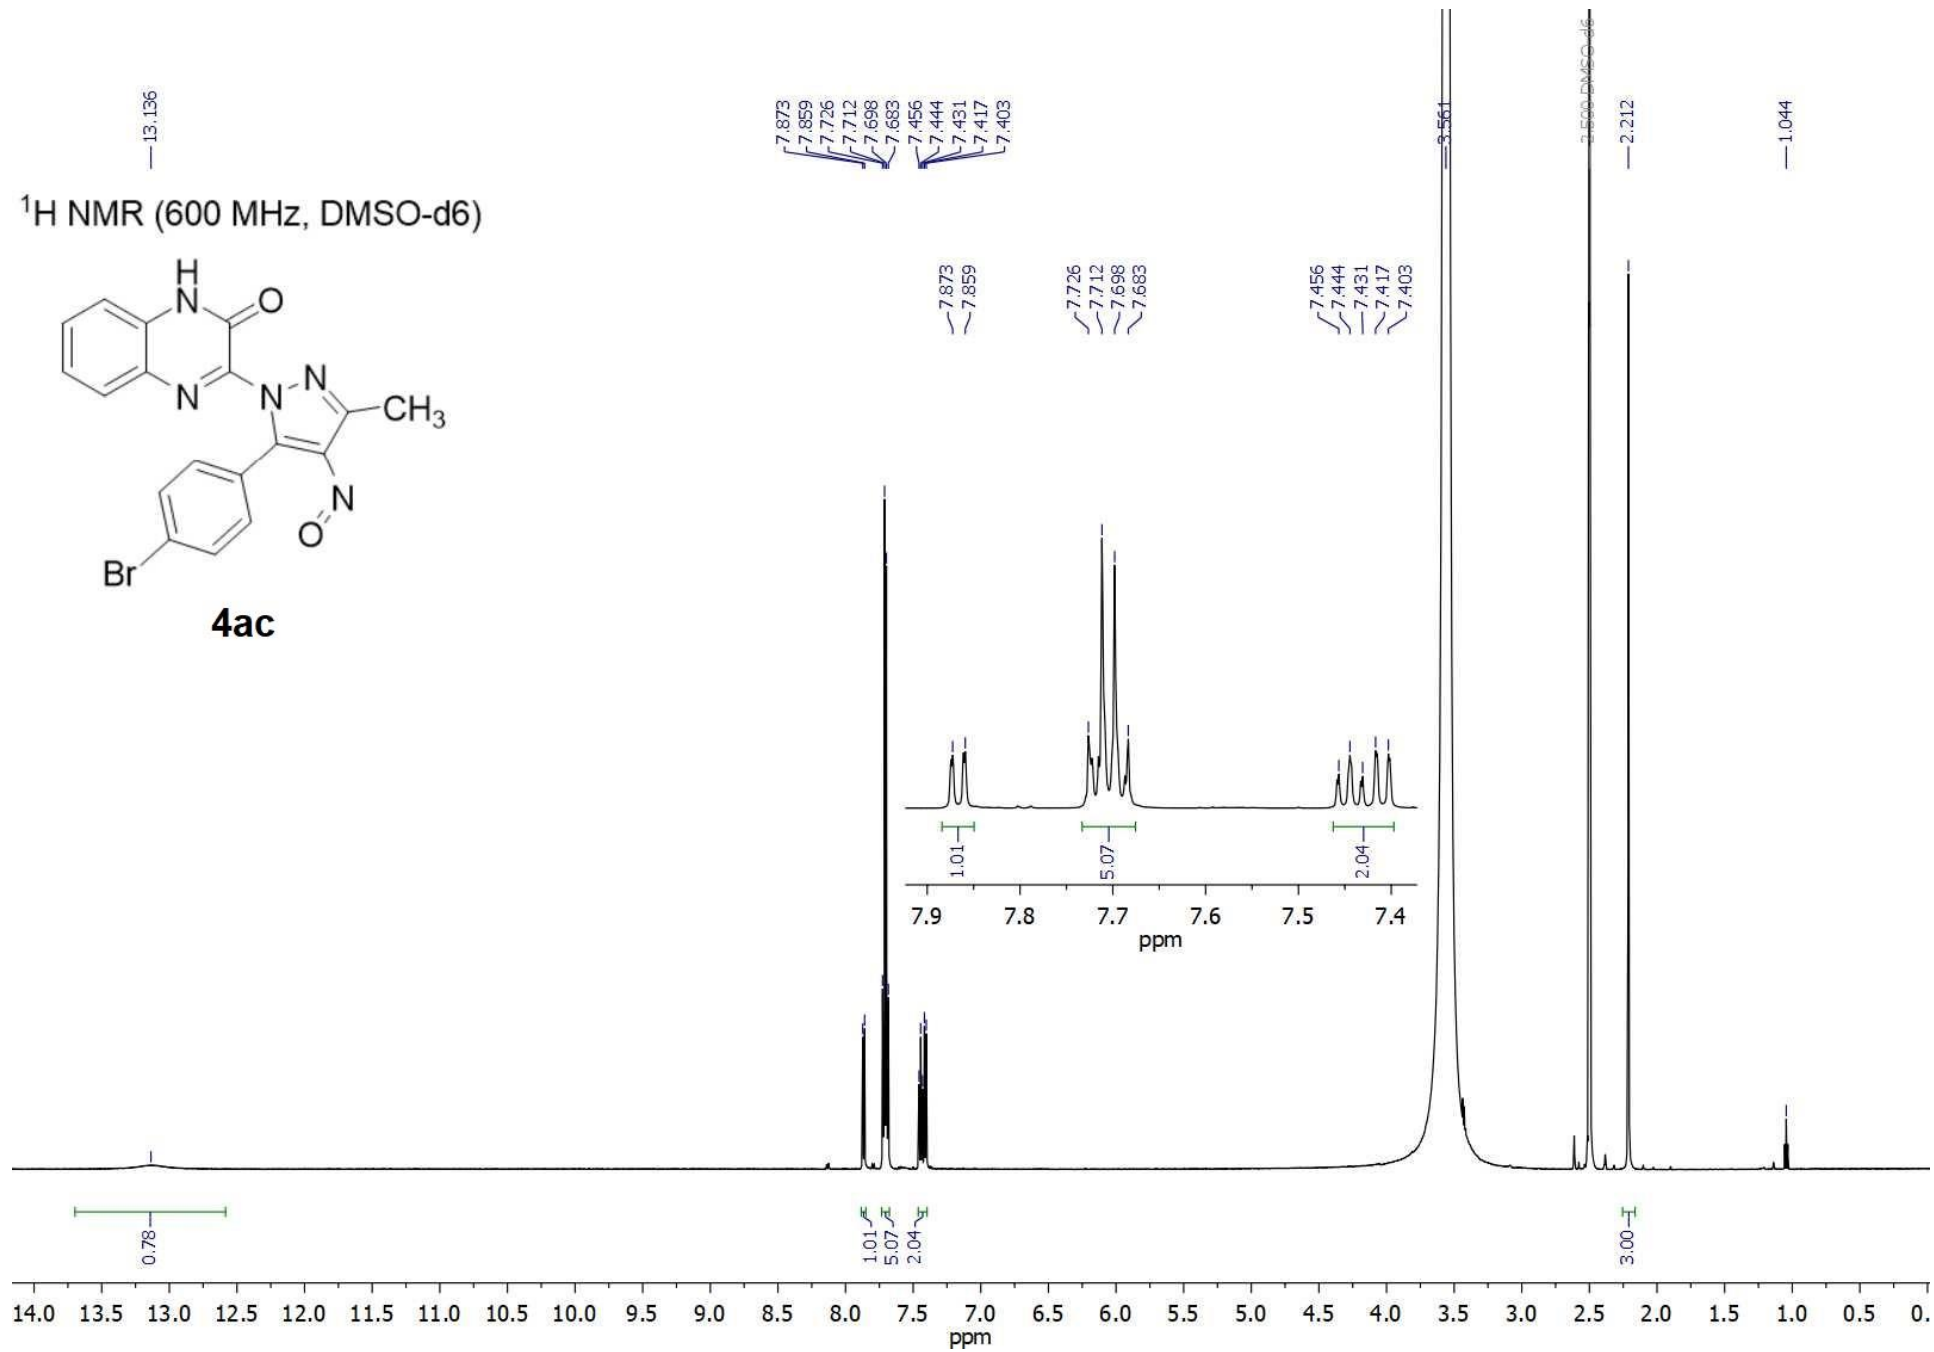

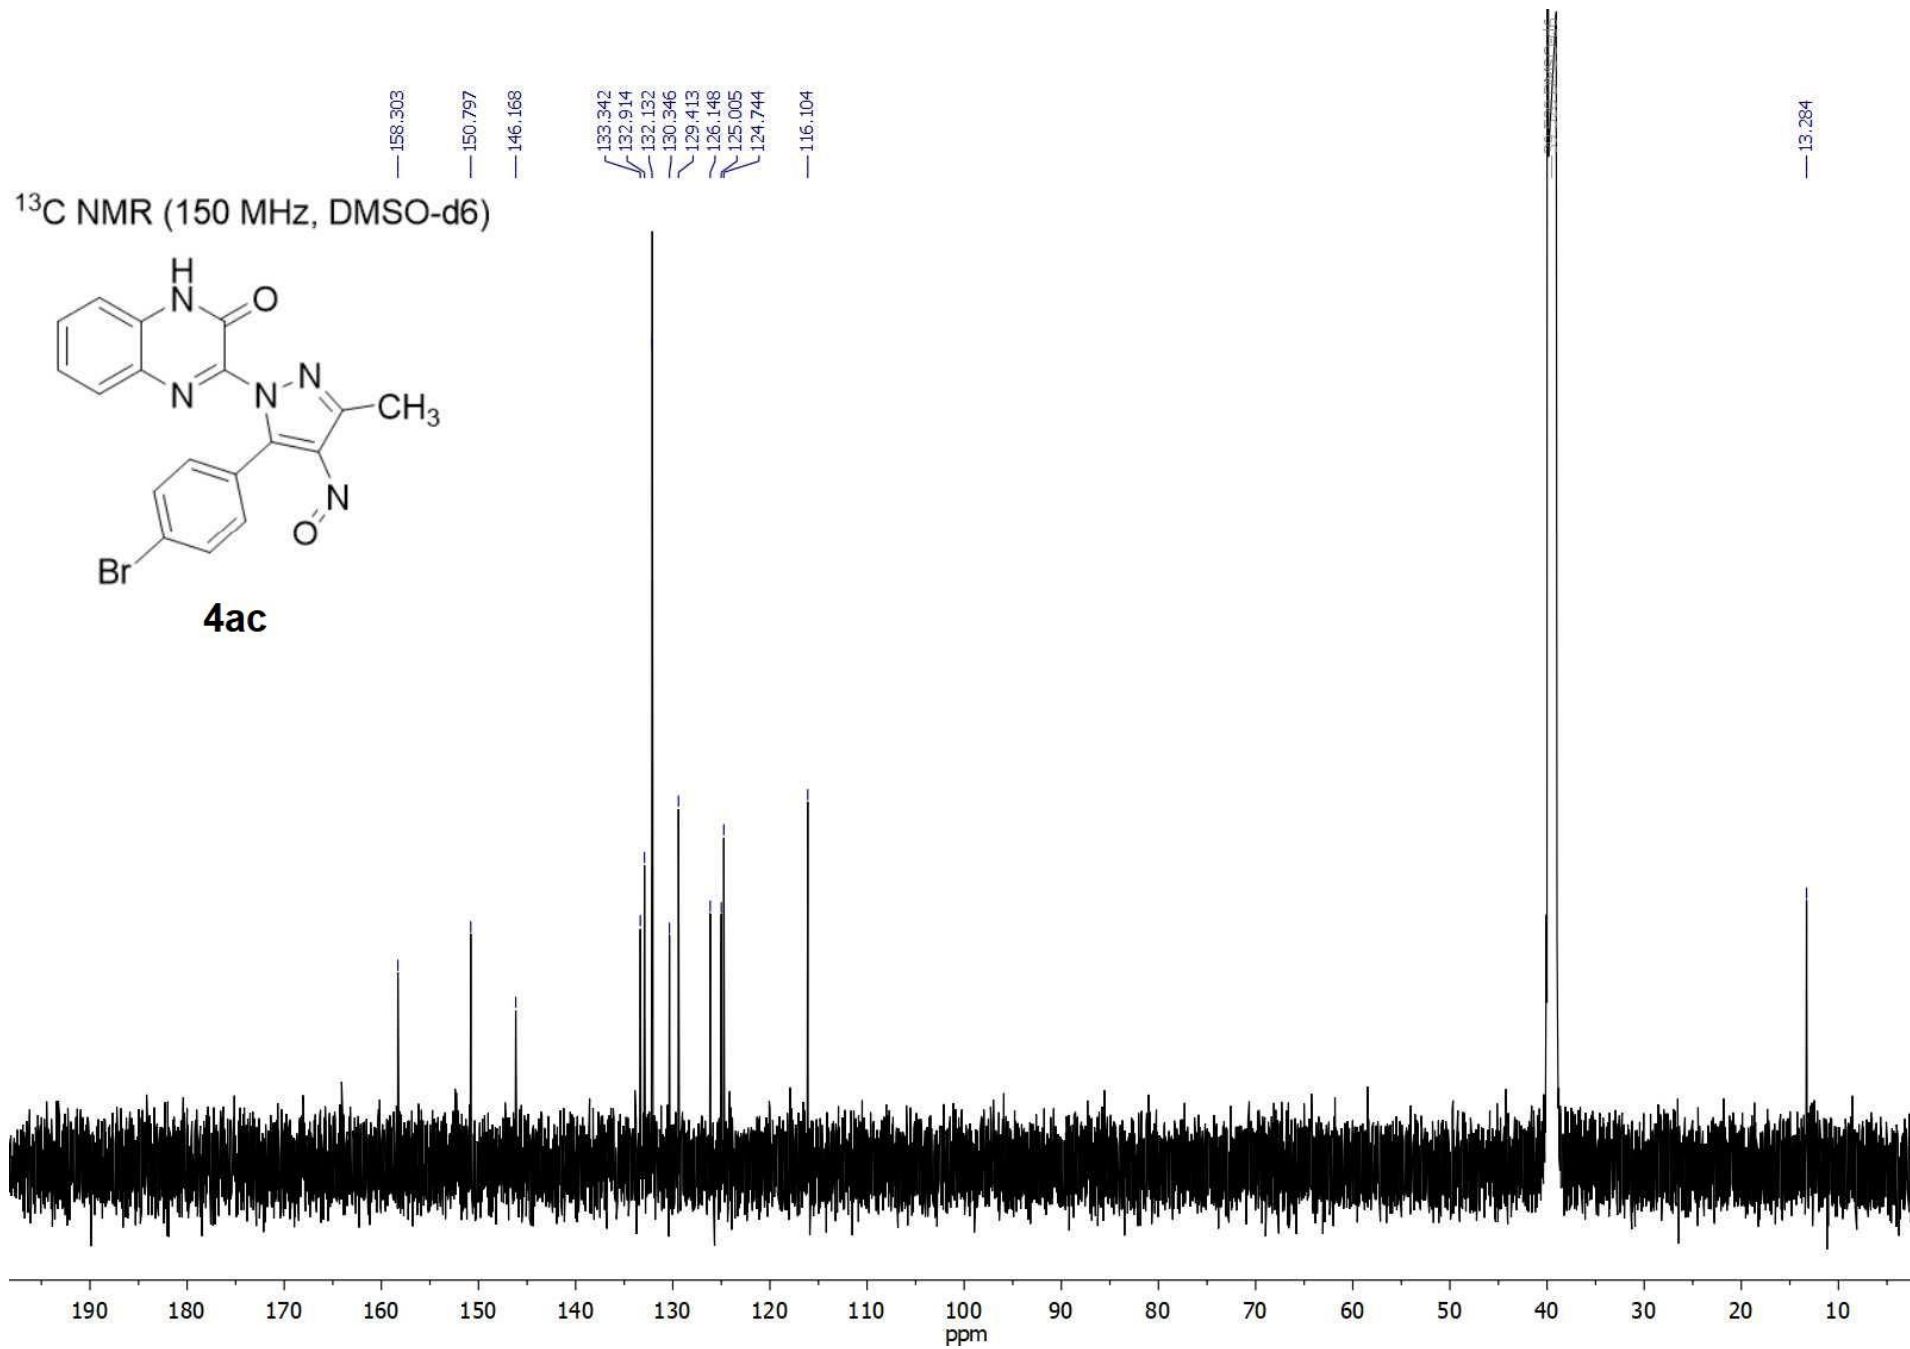



<sup>1</sup>H NMR (600 MHz, DMSO-d<sub>6</sub>)

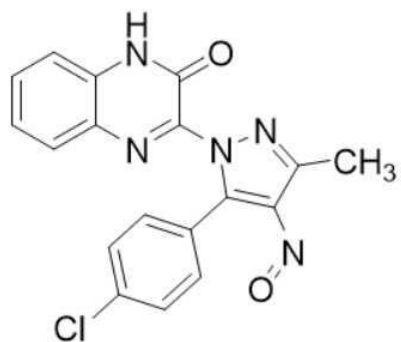

**4d**

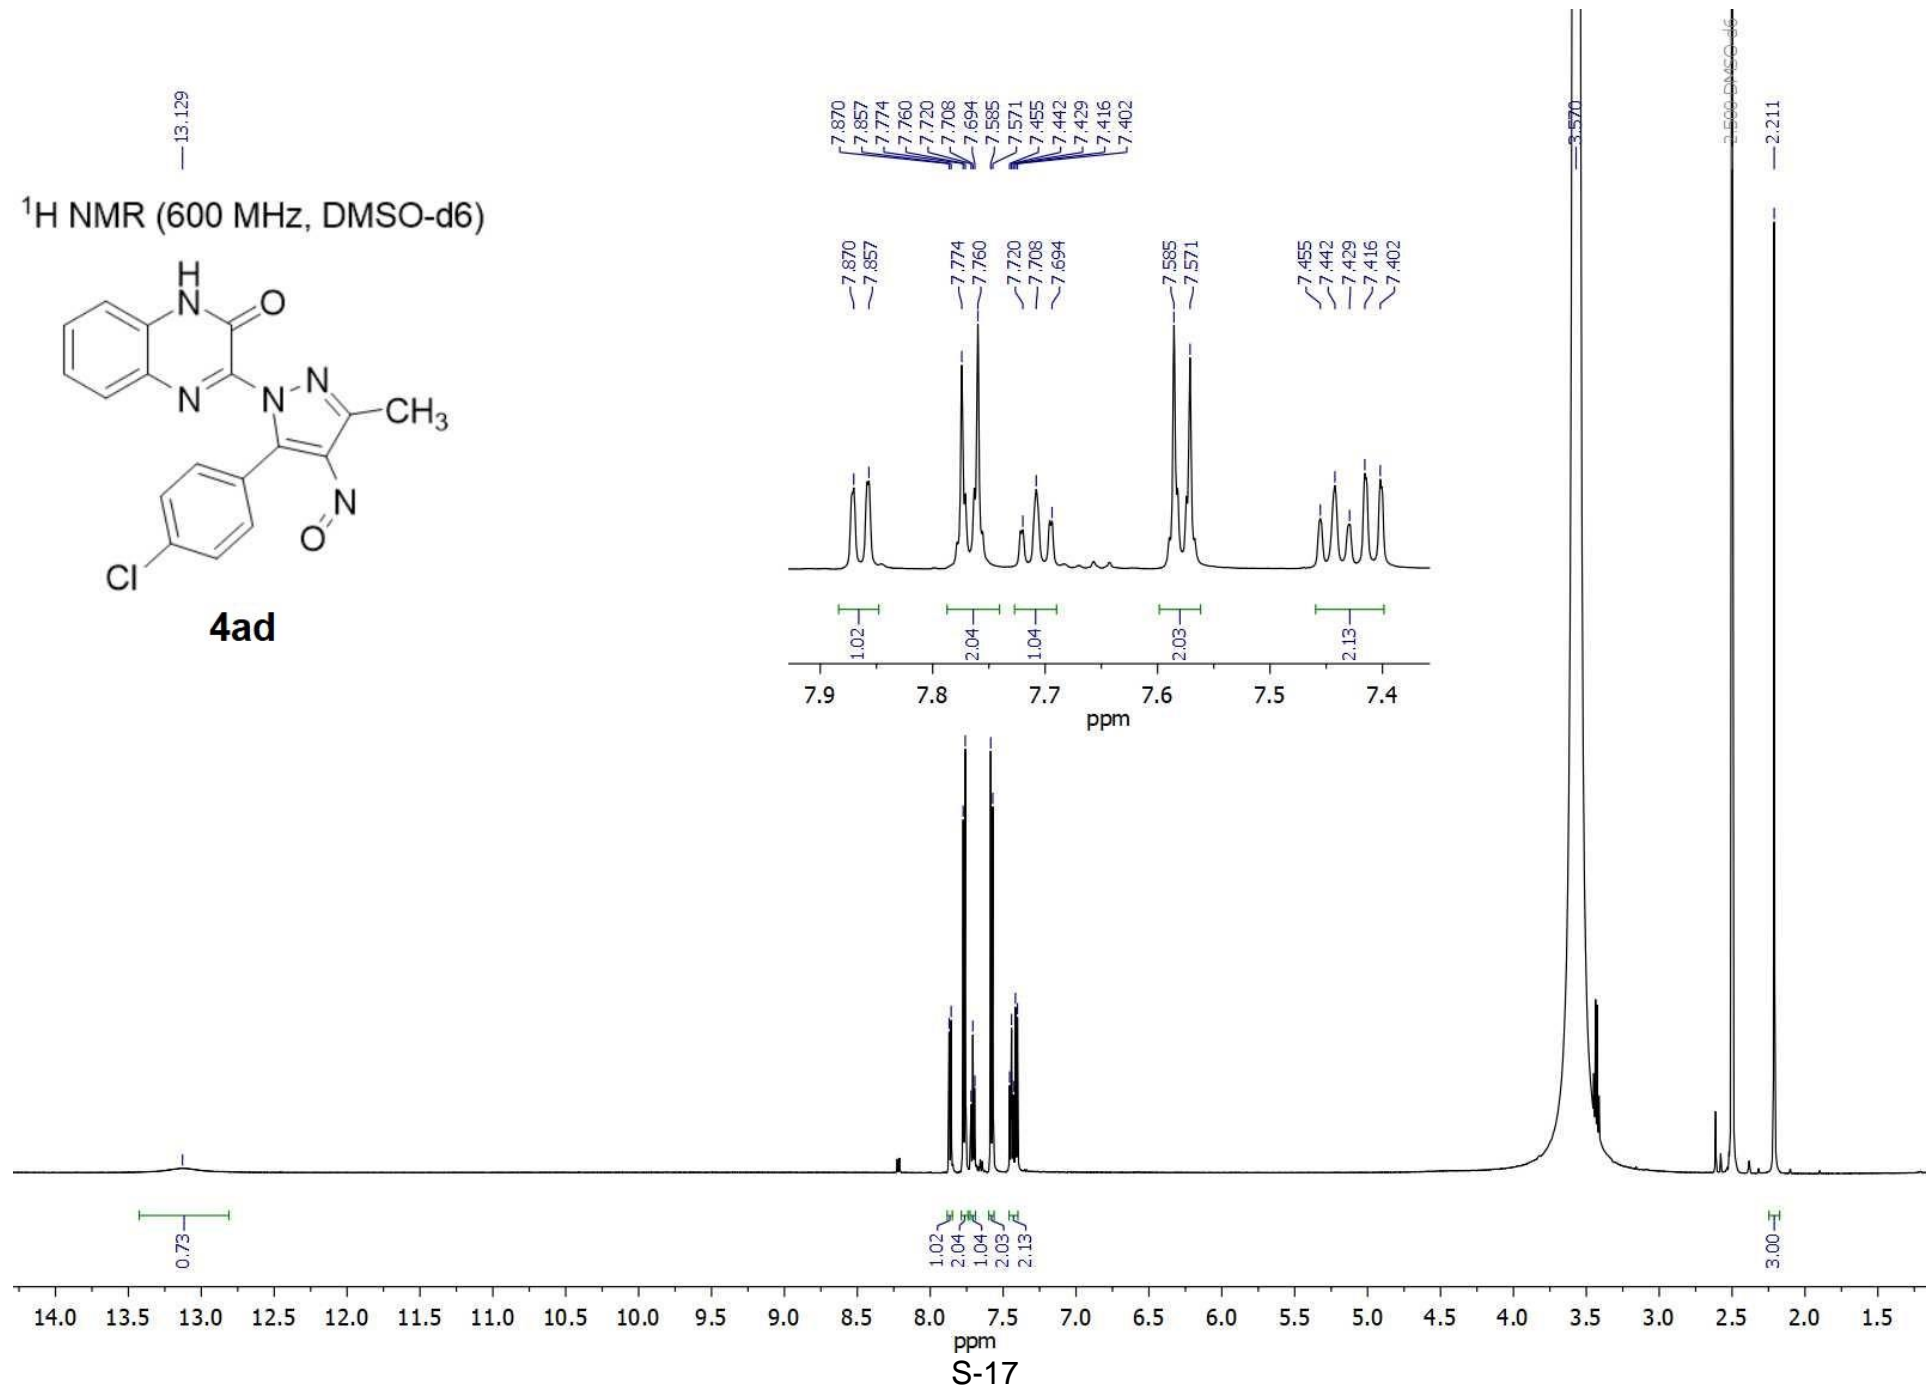

<sup>13</sup>C NMR (150 MHz, DMSO-d6)

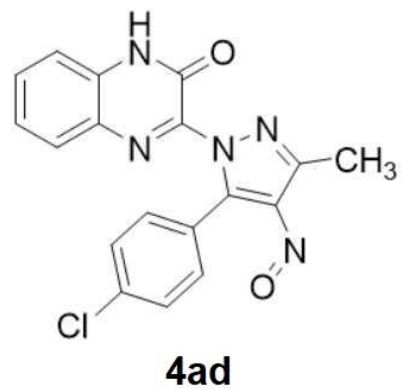

— 158.370  
— 150.816  
— 146.177  
— 136.174  
— 133.342  
— 132.920  
— 131.987  
— 130.344  
— 129.415  
— 125.784  
— 124.750  
— 116.105

— 13.291

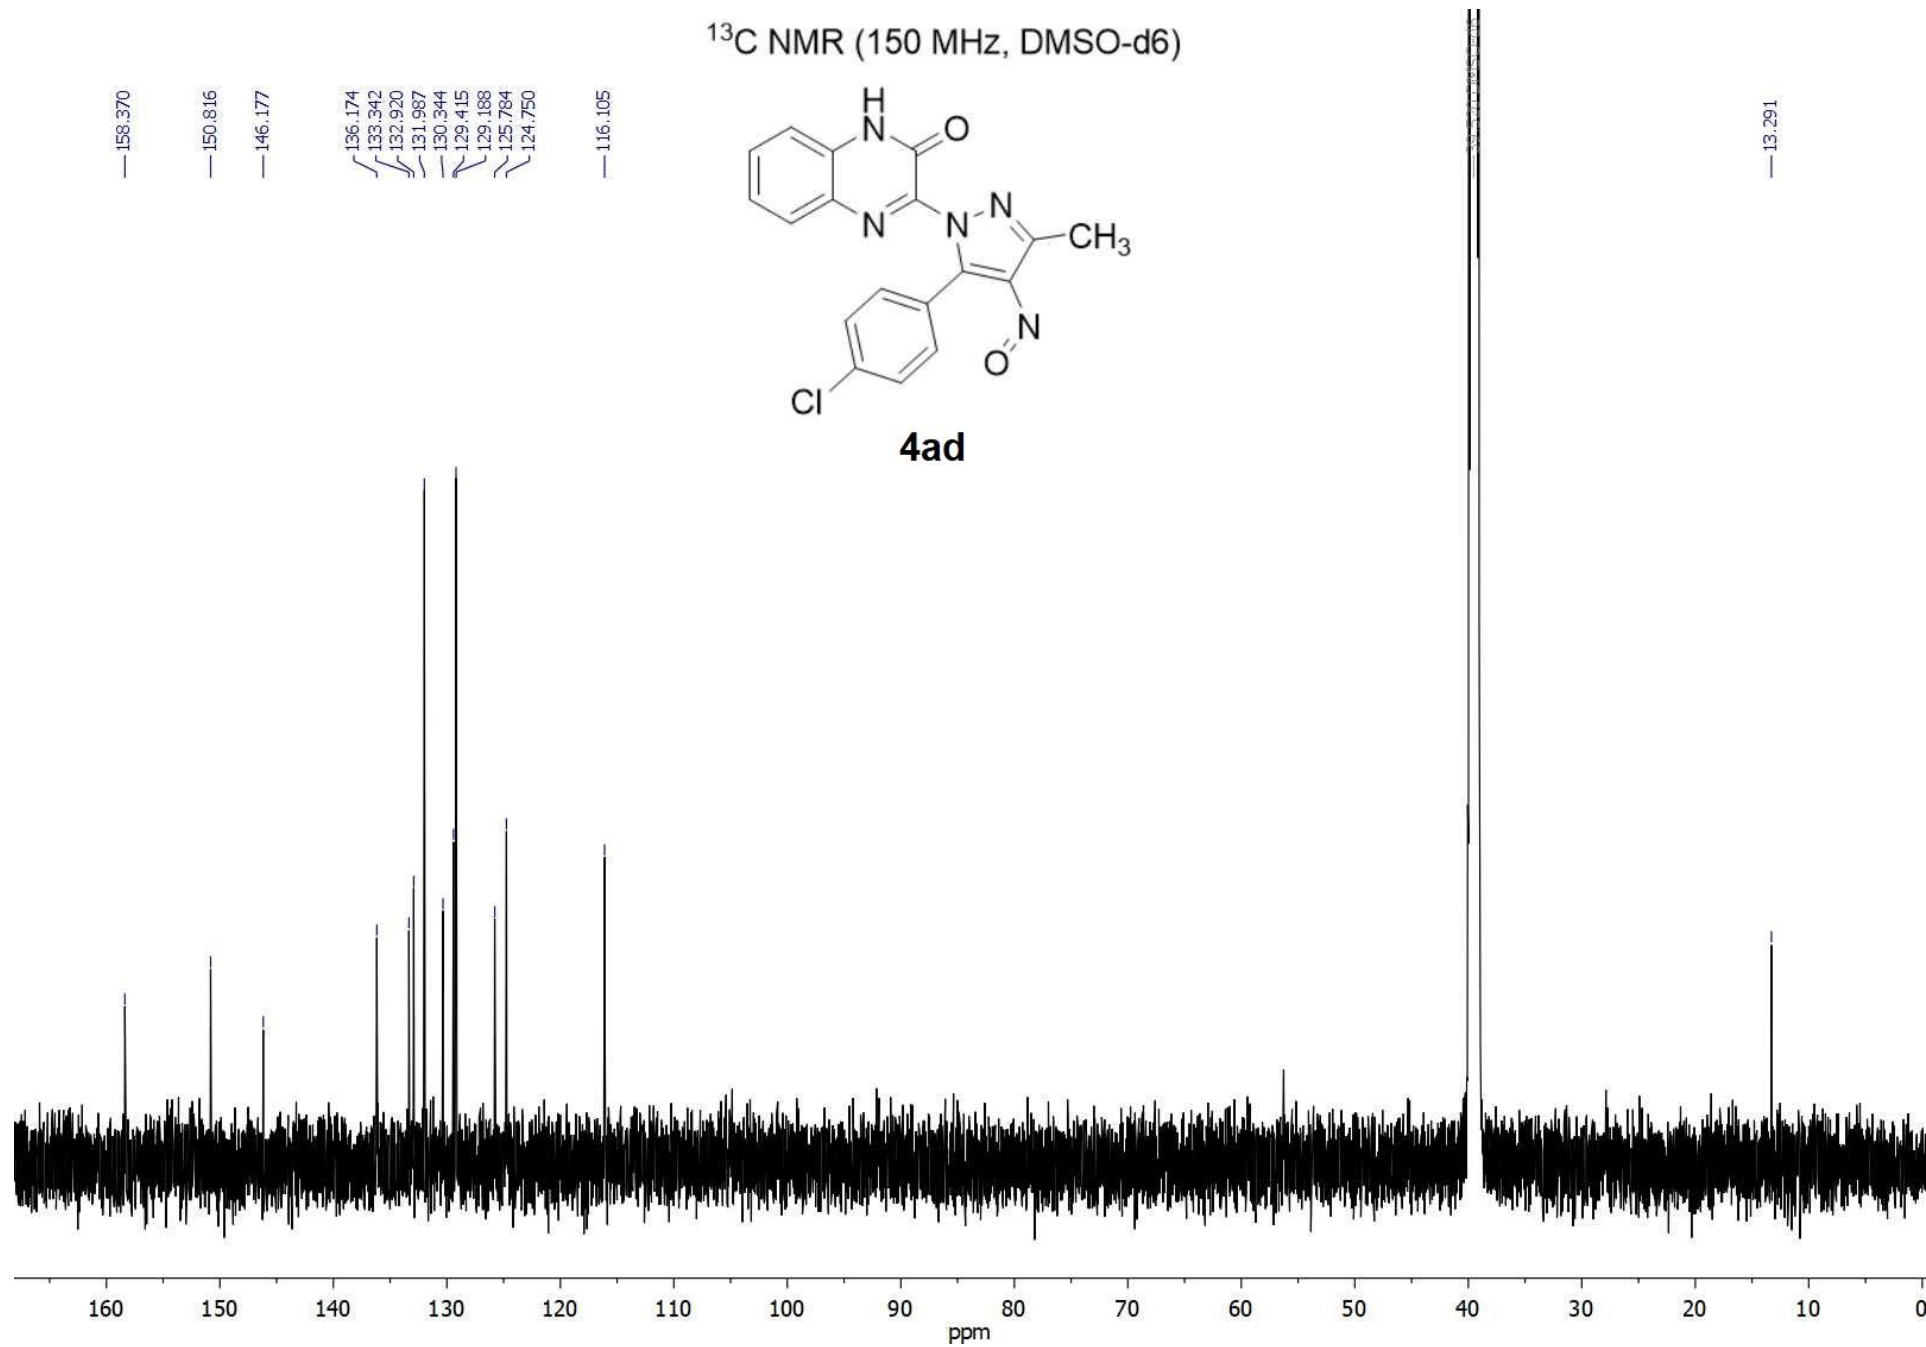

<sup>1</sup>H NMR (600 MHz, DMSO-d<sub>6</sub>)

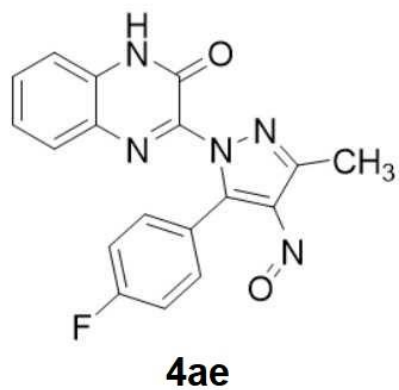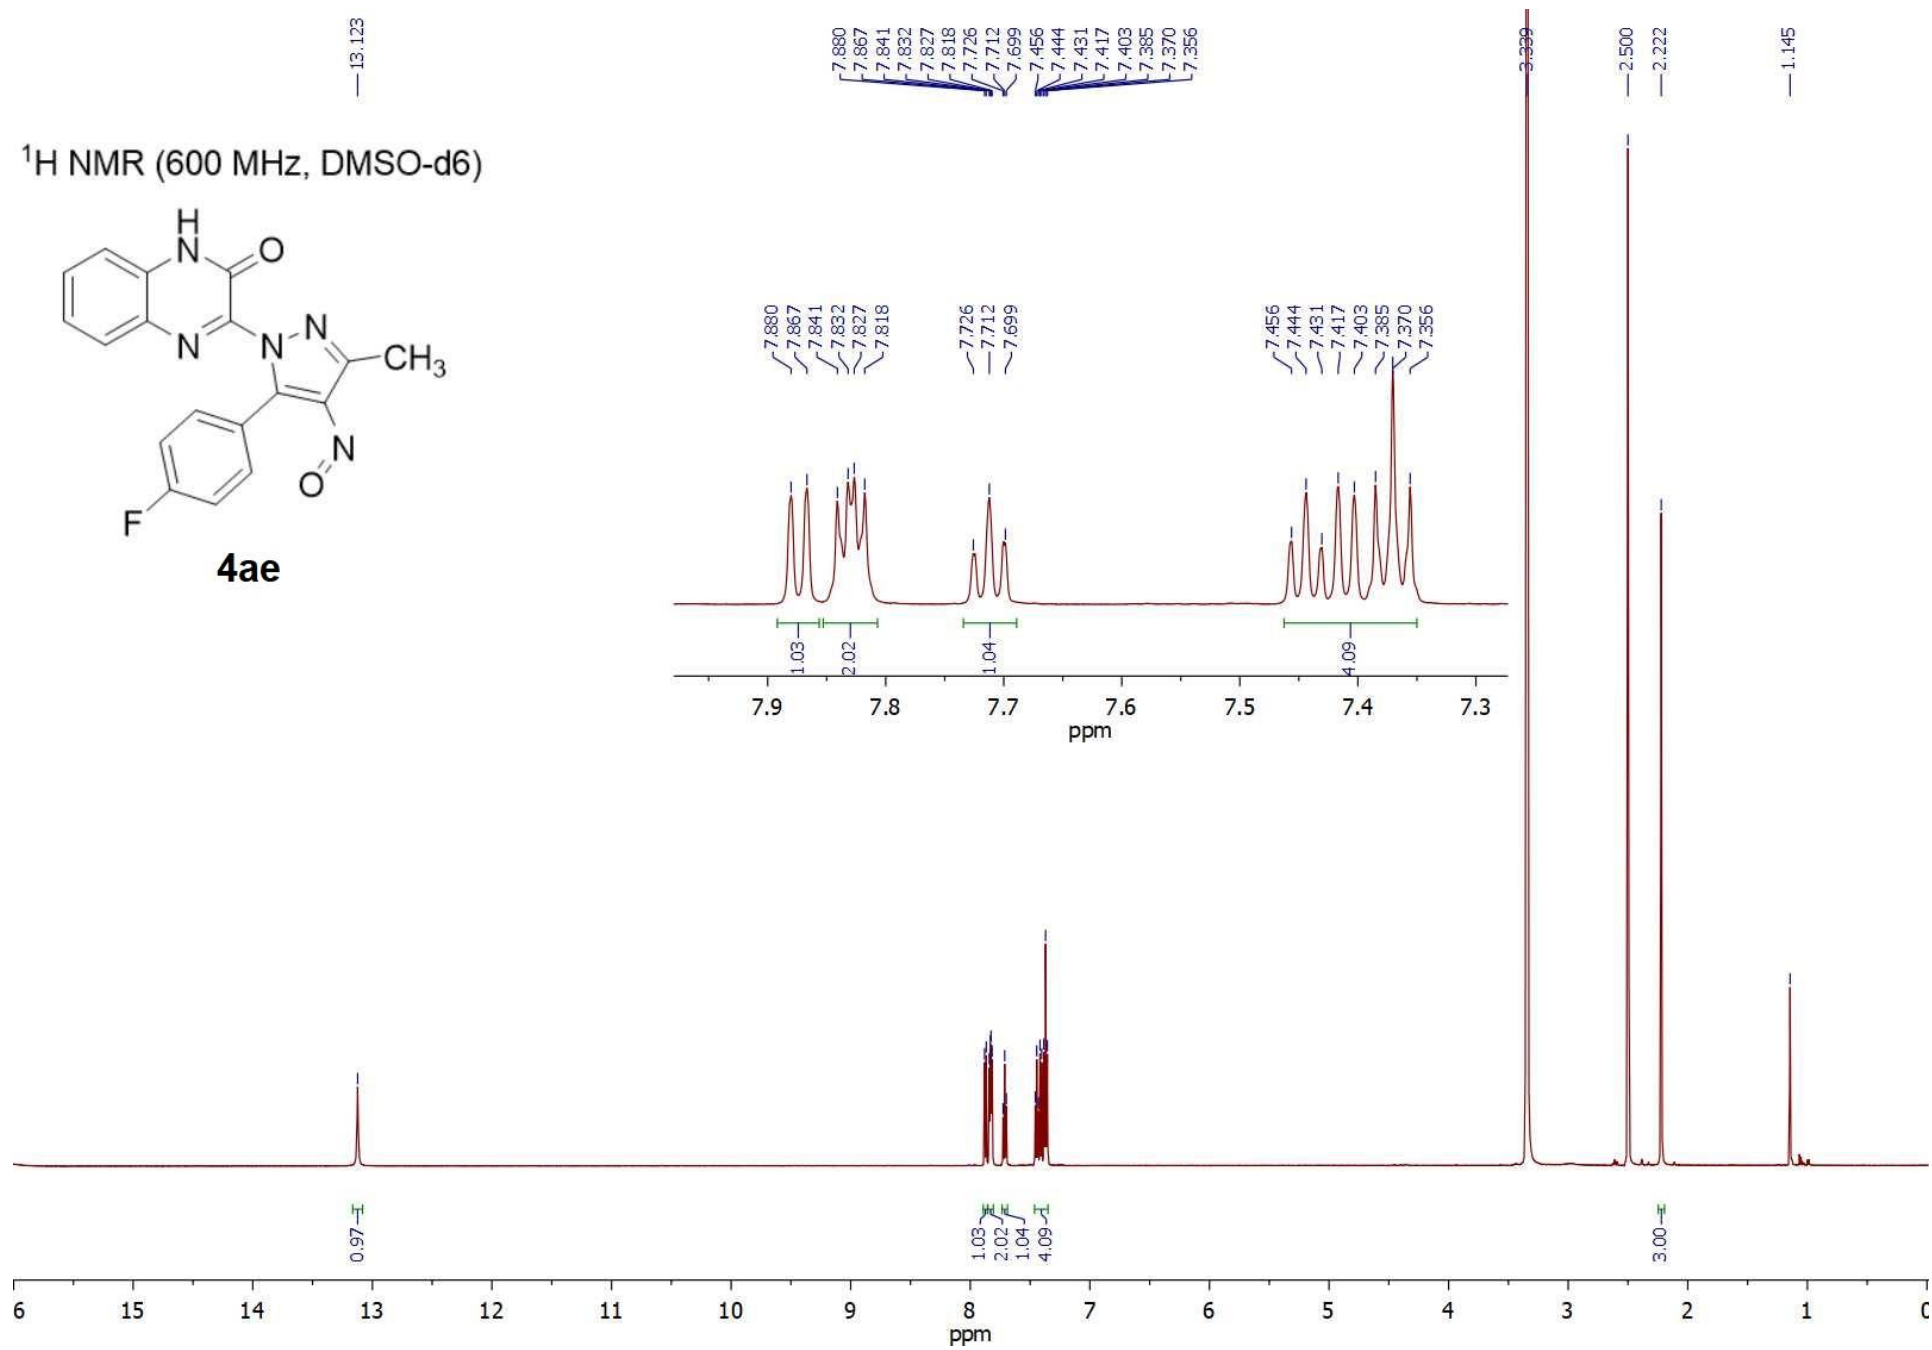

164.408  
162.754  
158.334  
150.654

133.236  
132.642  
132.581  
130.156  
129.219  
124.425  
123.254  
116.152  
116.005  
115.908

13.171

<sup>13</sup>C NMR (150 MHz, DMSO-d<sub>6</sub>)

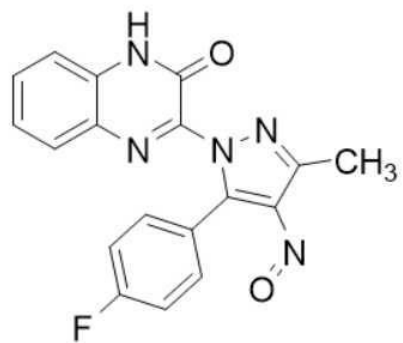

**4ae**

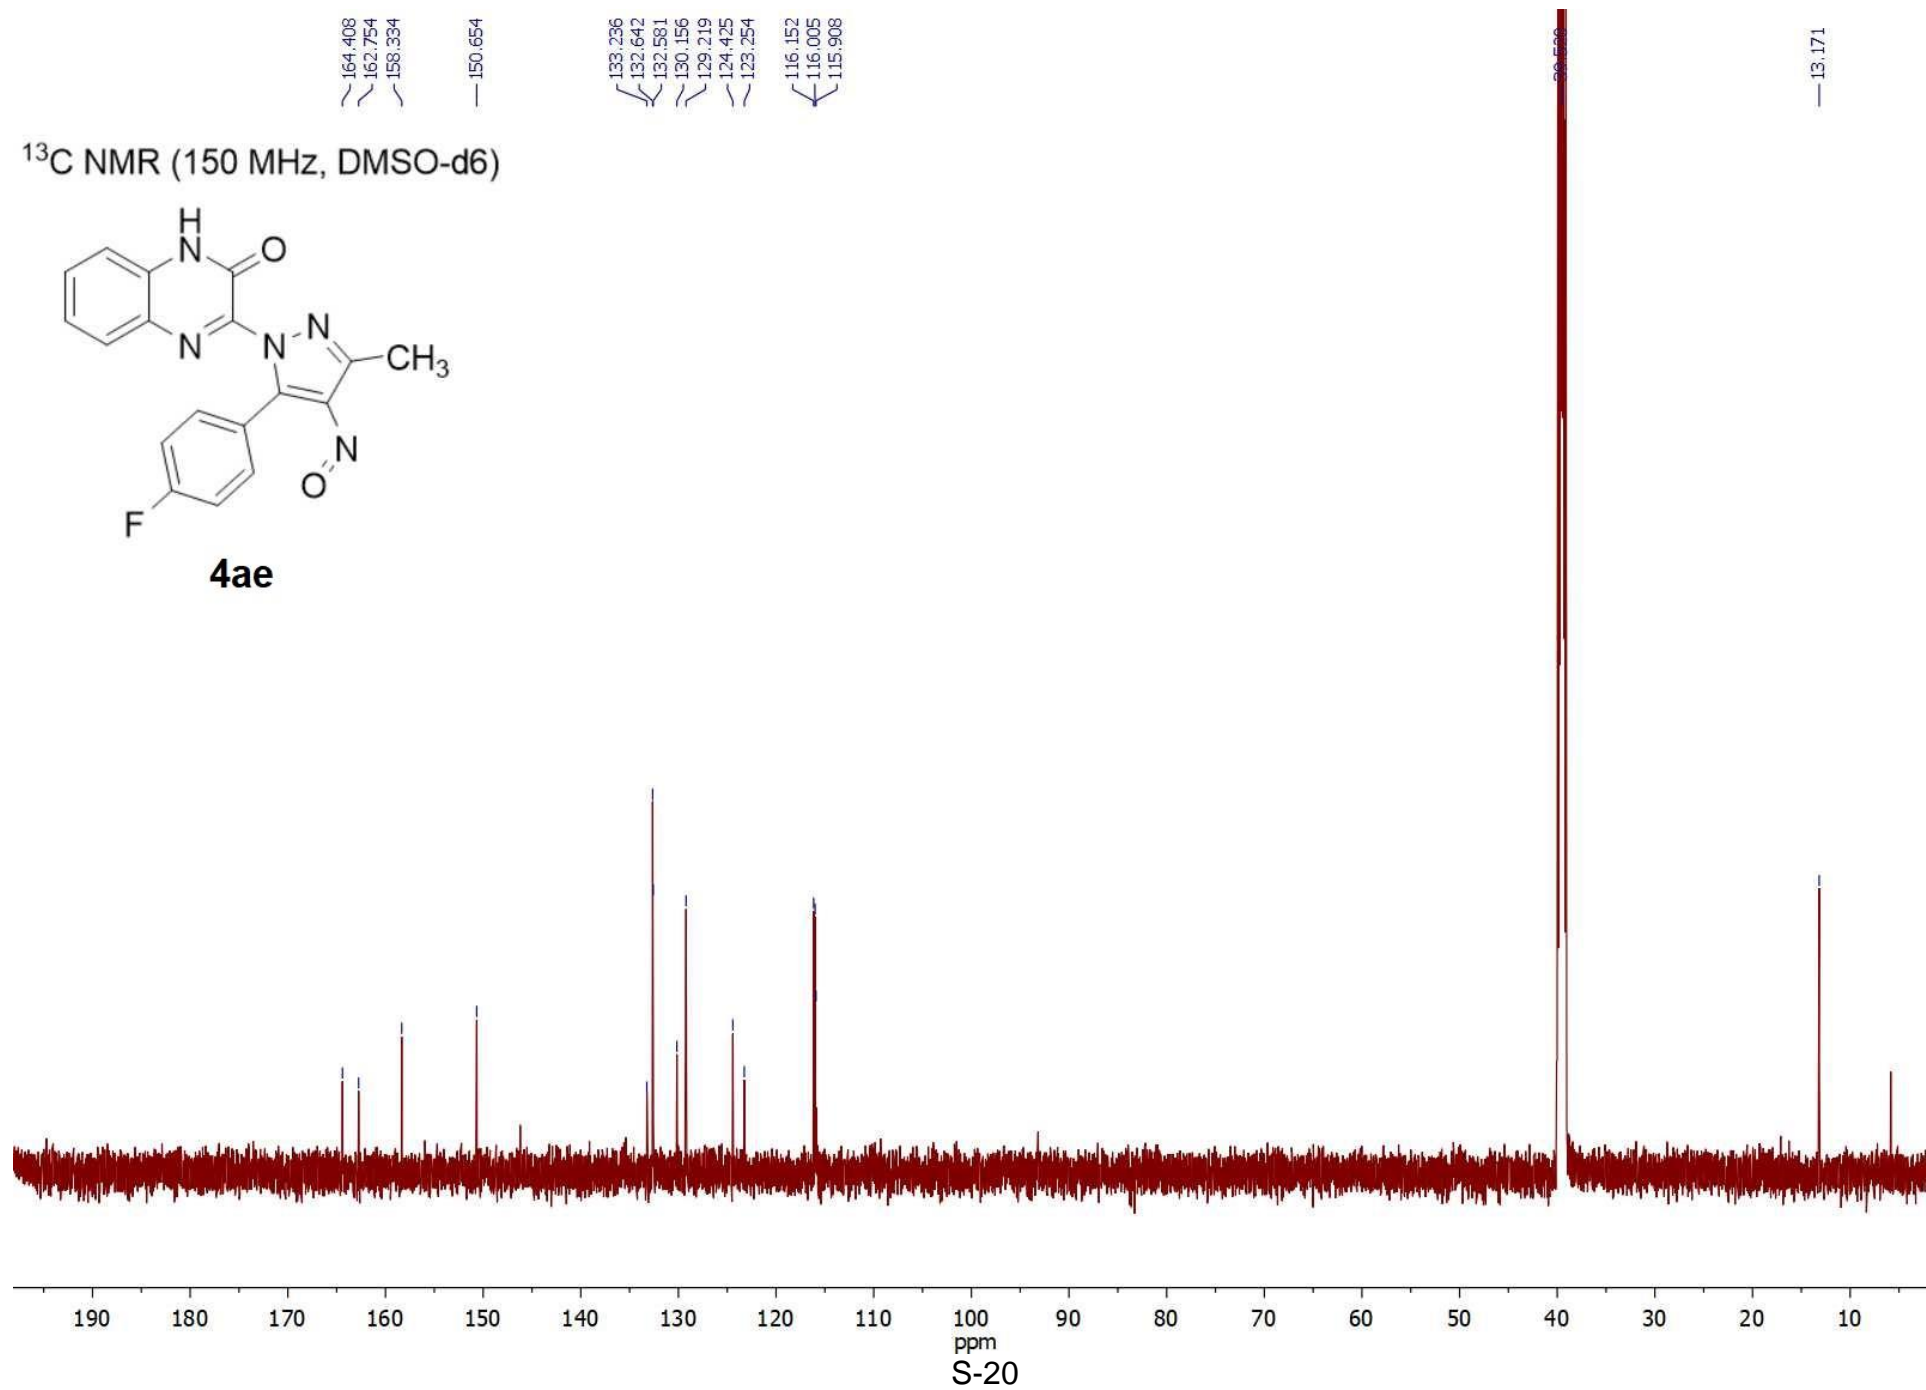

$^{19}\text{F}$  NMR (564 MHz, DMSO- $d_6$ )

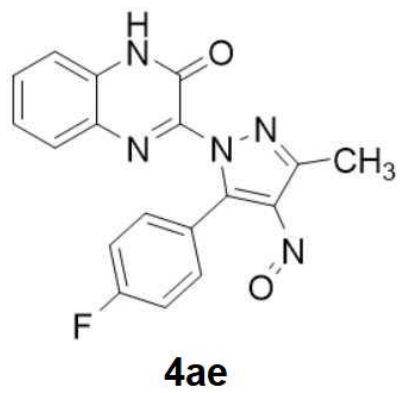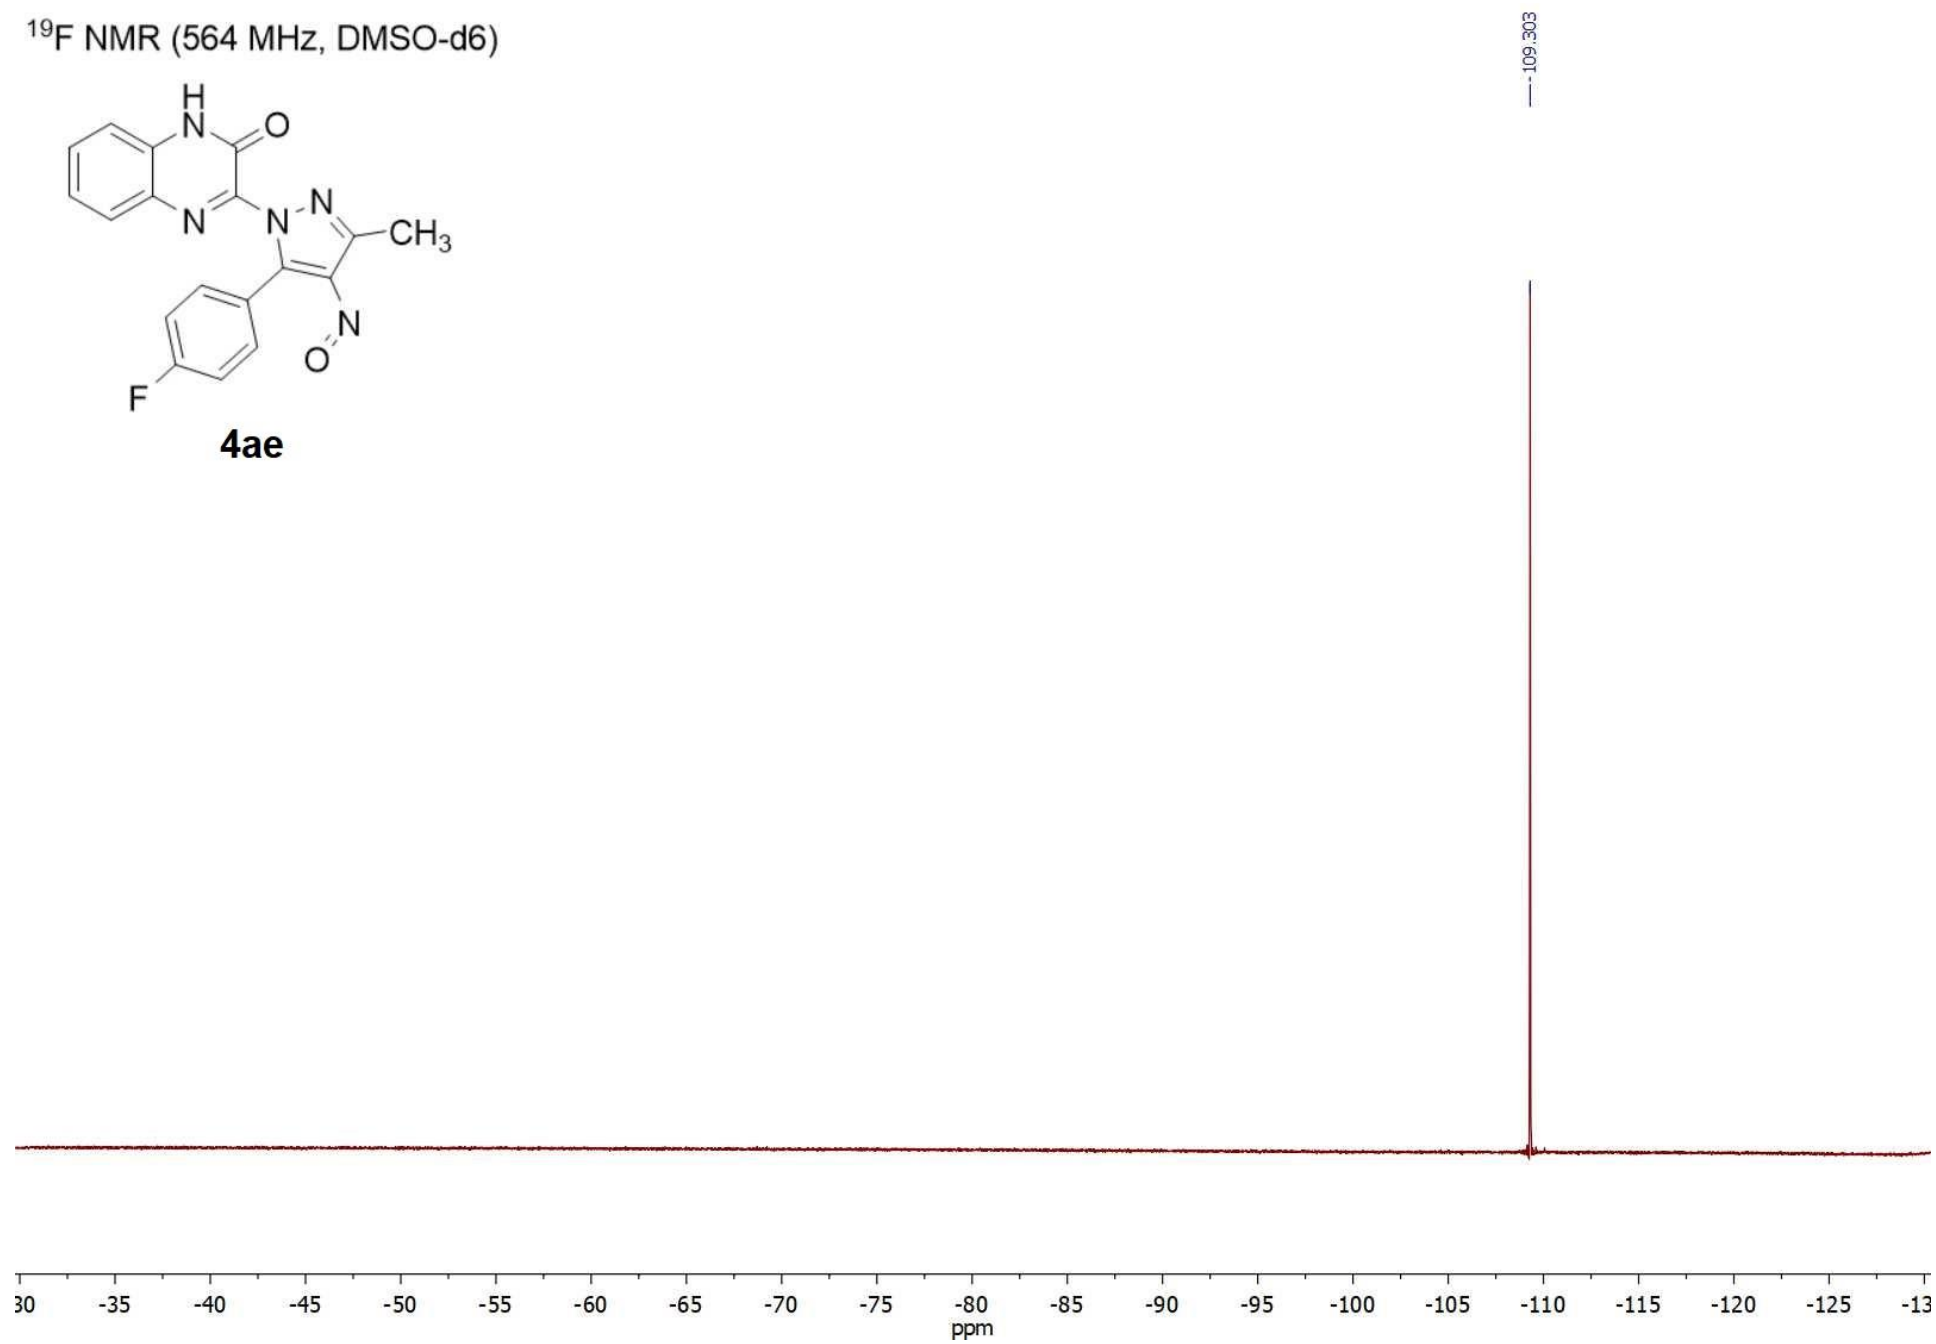

HSQC (DMSO-d6)

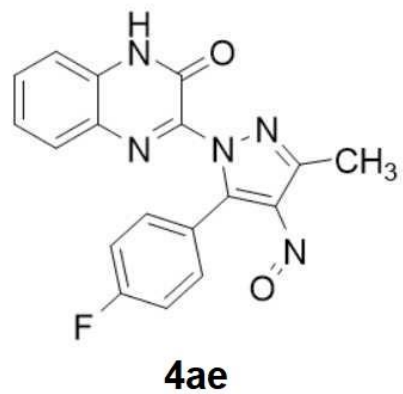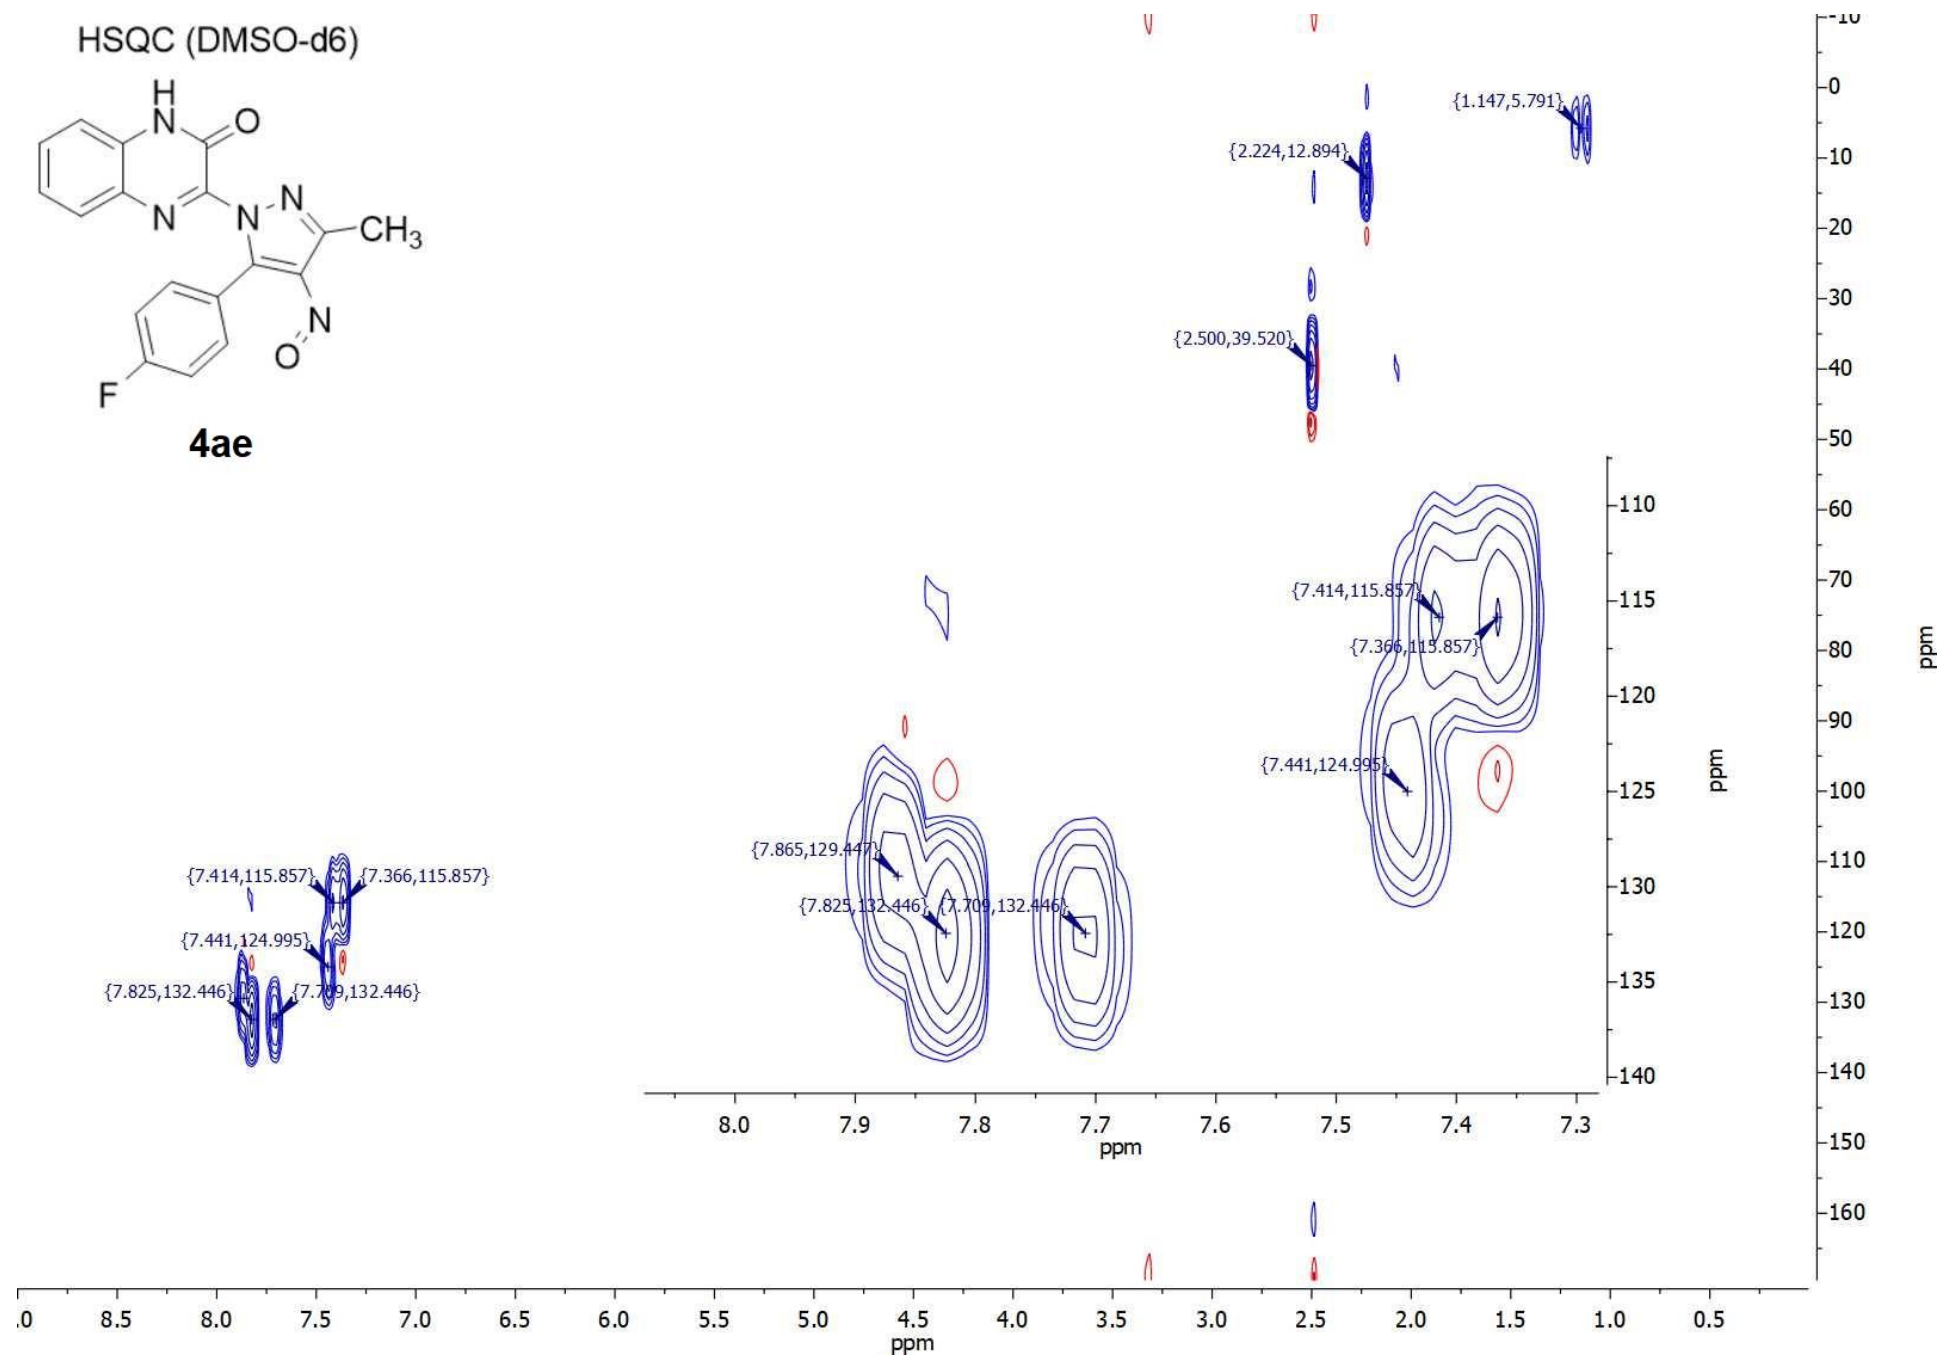

<sup>1</sup>H NMR (600 MHz, DMSO-d6)

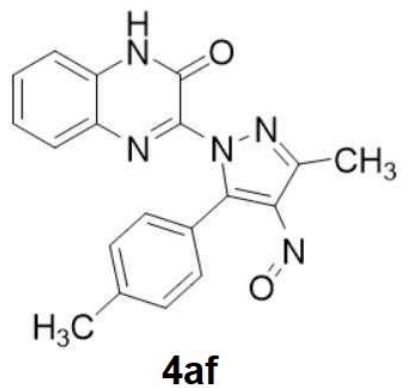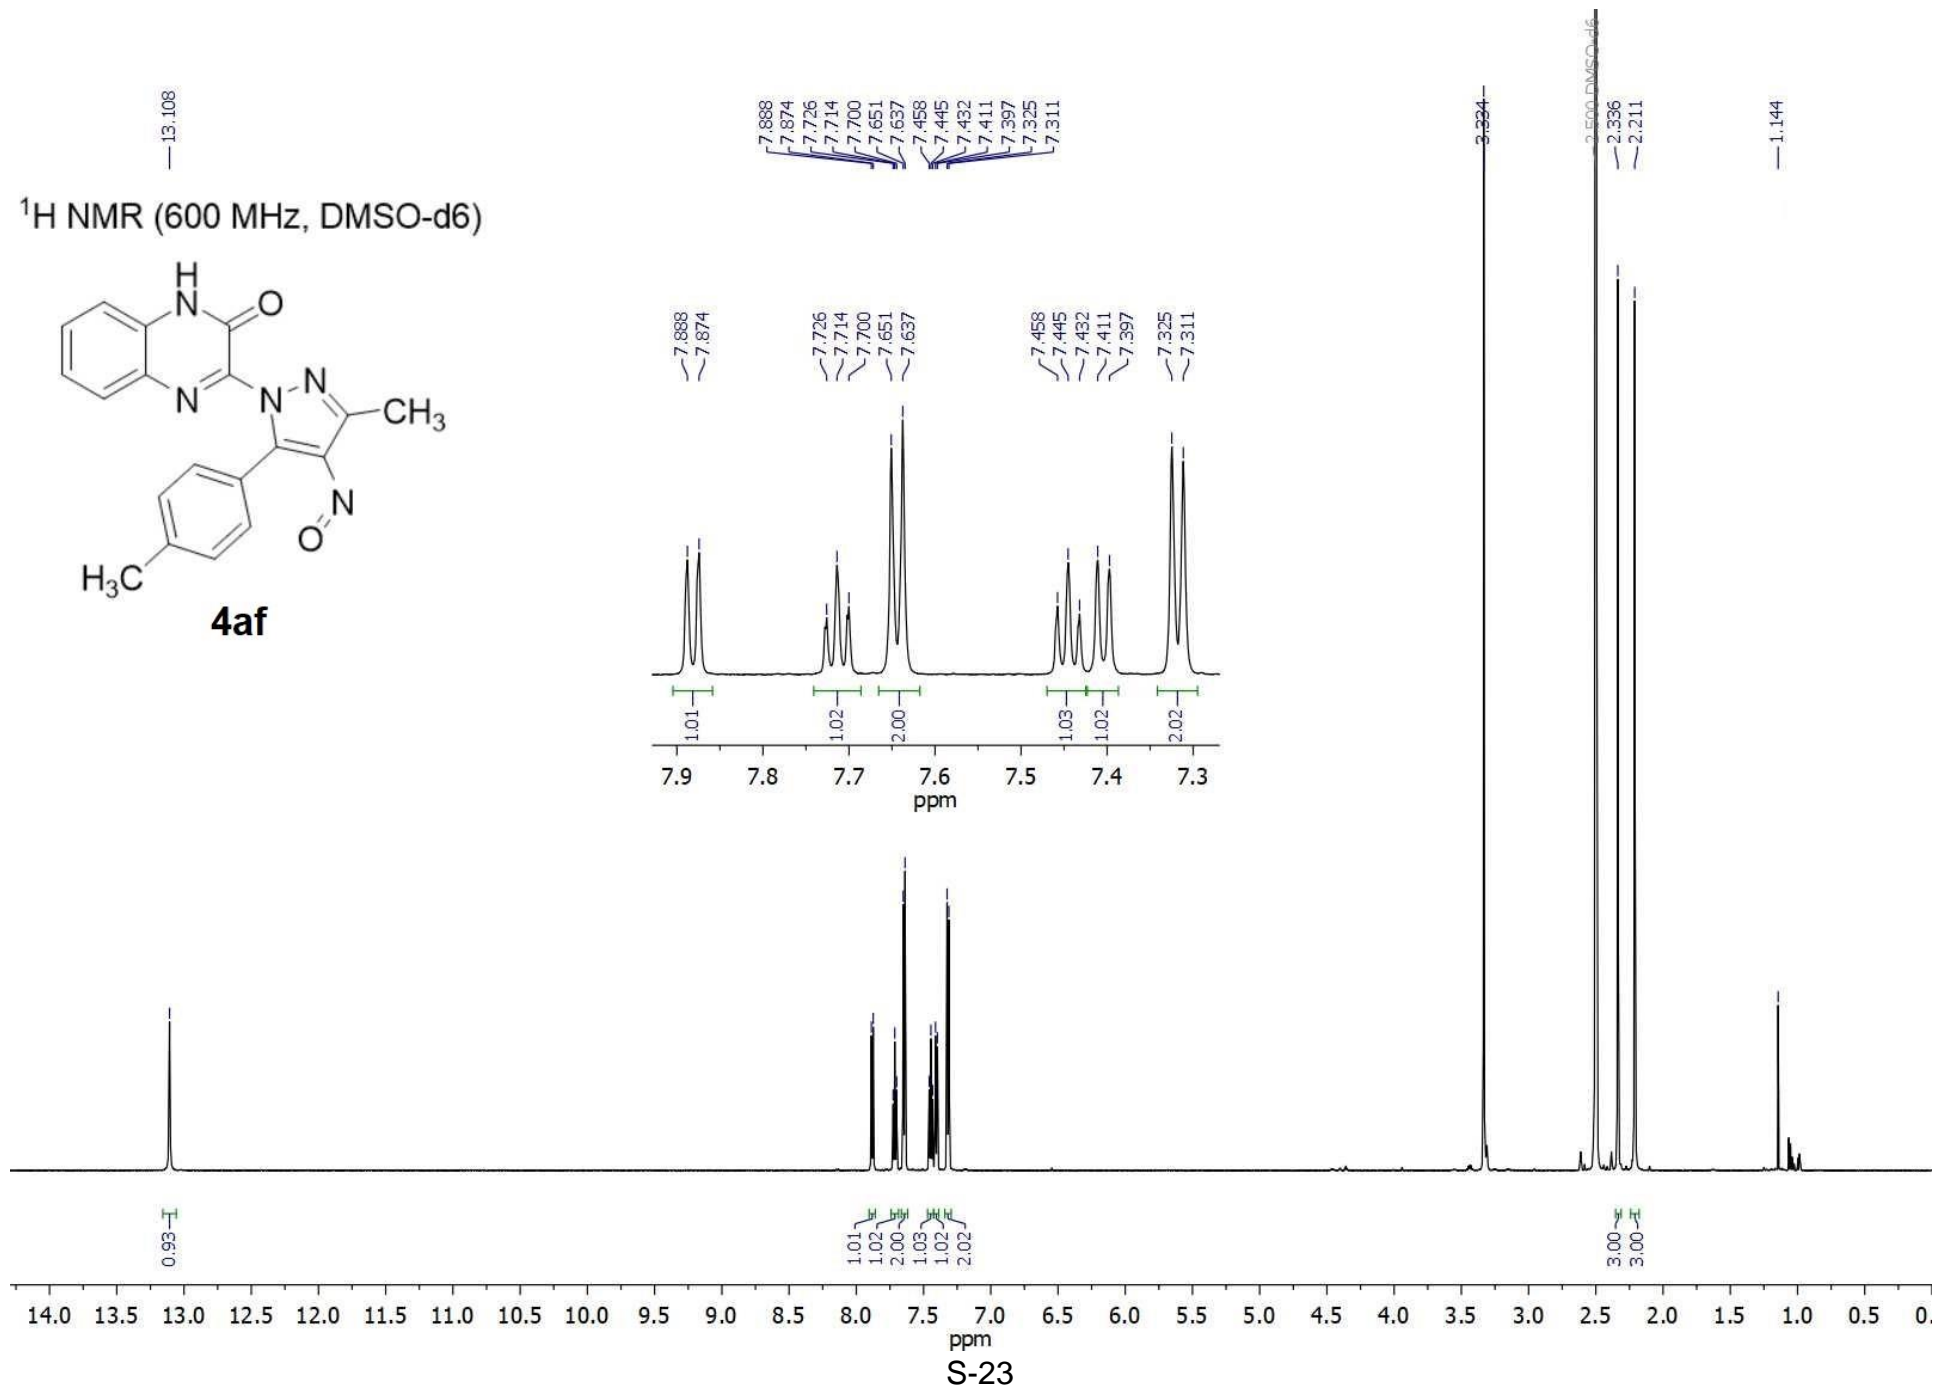

<sup>13</sup>C NMR (150 MHz, DMSO-d6)

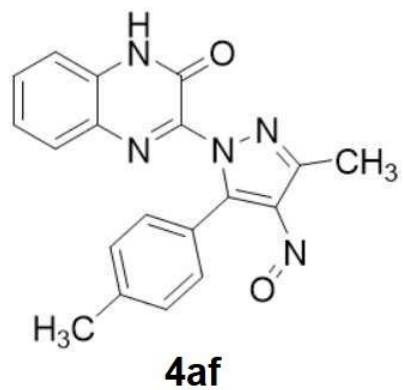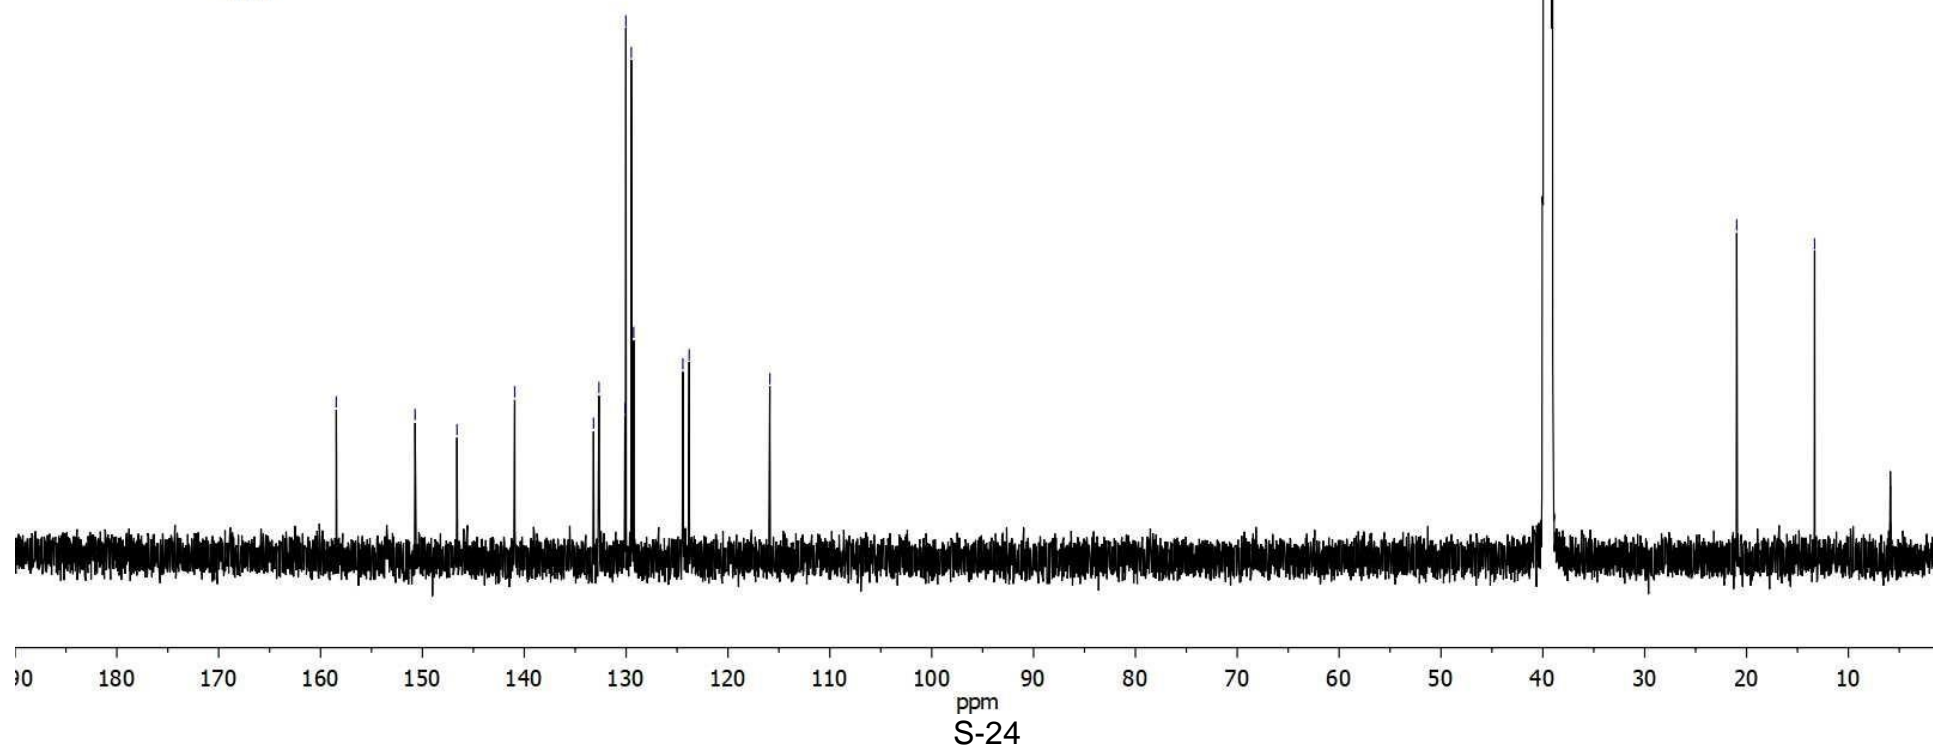



COSY (DMSO-d6)

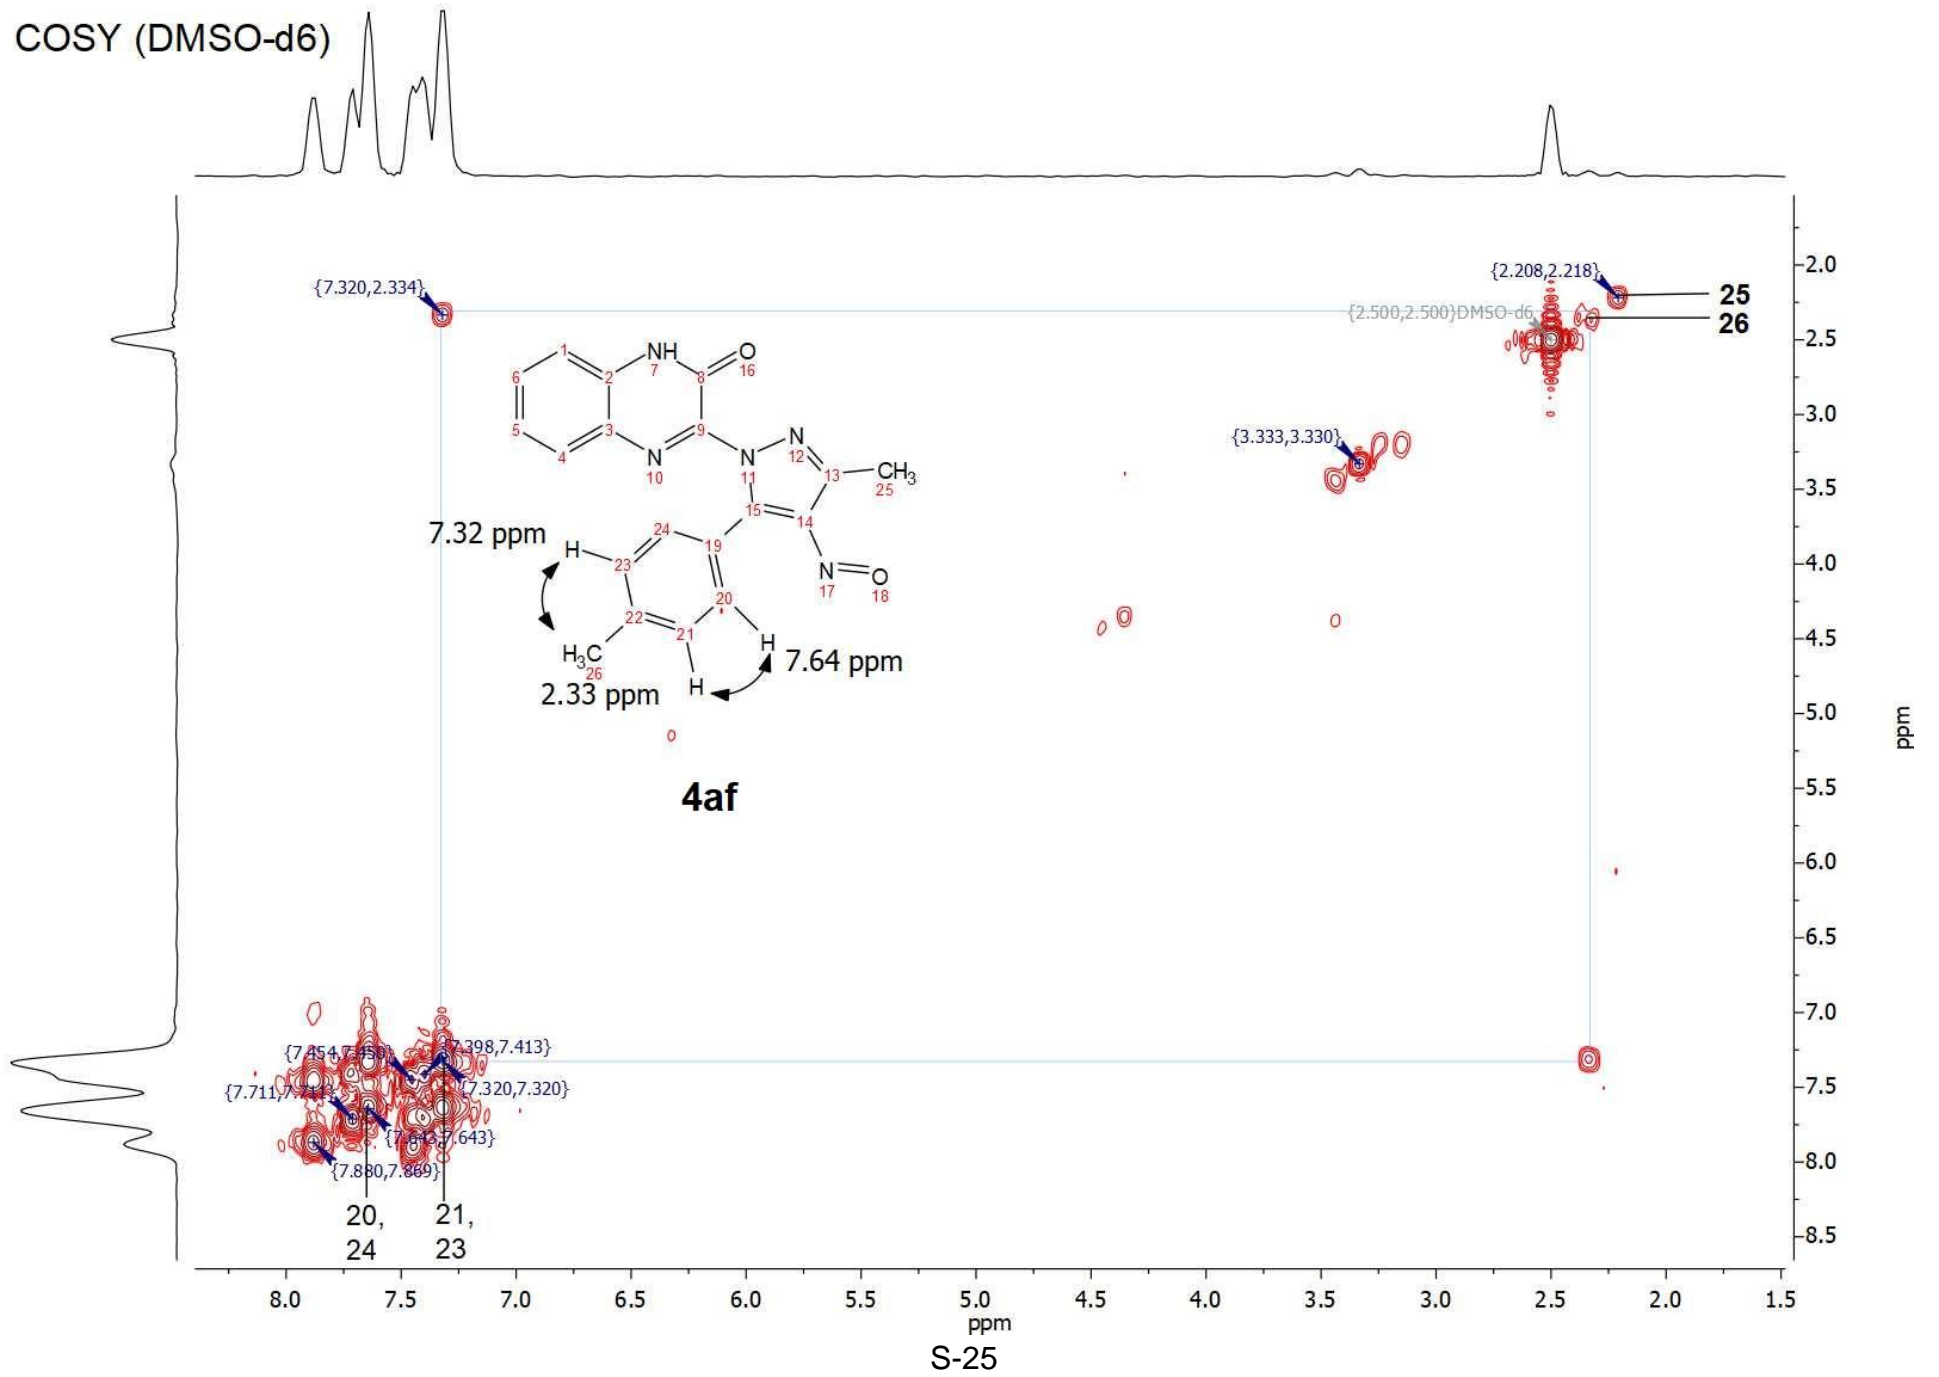

<sup>1</sup>H NMR (600 MHz, DMSO-d<sub>6</sub>)

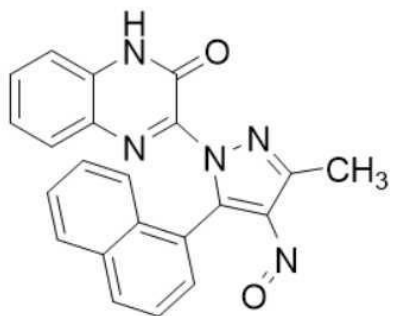

4ag

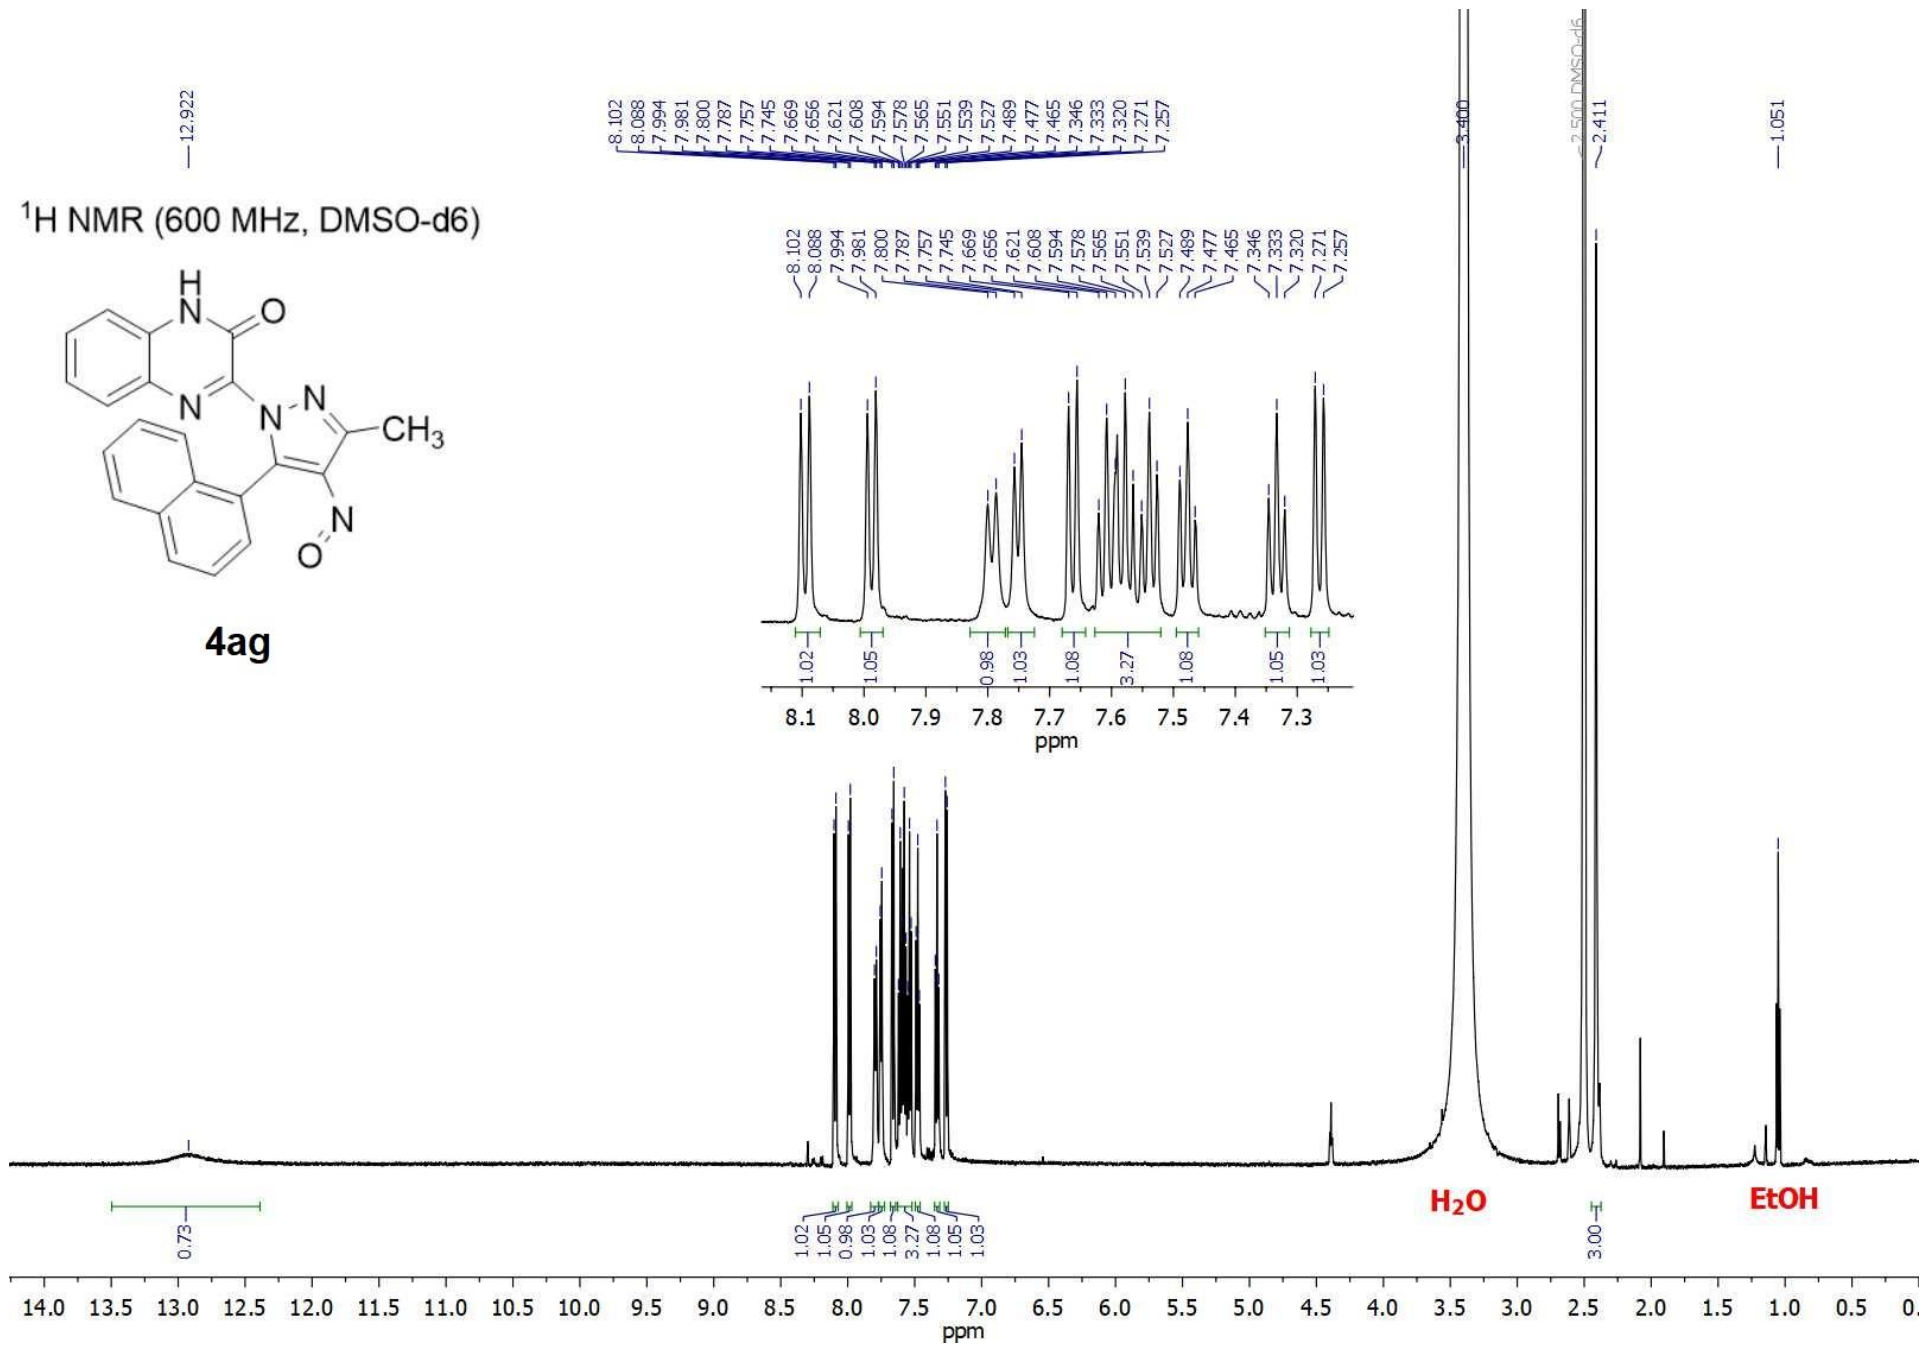

<sup>13</sup>C NMR (150 MHz, DMSO-d6)

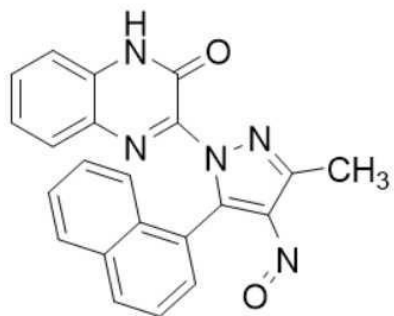

**4ag**

159.648  
145.928  
132.951  
132.543  
131.589  
131.069  
129.921  
129.889  
129.014  
128.344  
127.182  
126.612  
125.461  
125.108  
124.314  
124.271  
115.944

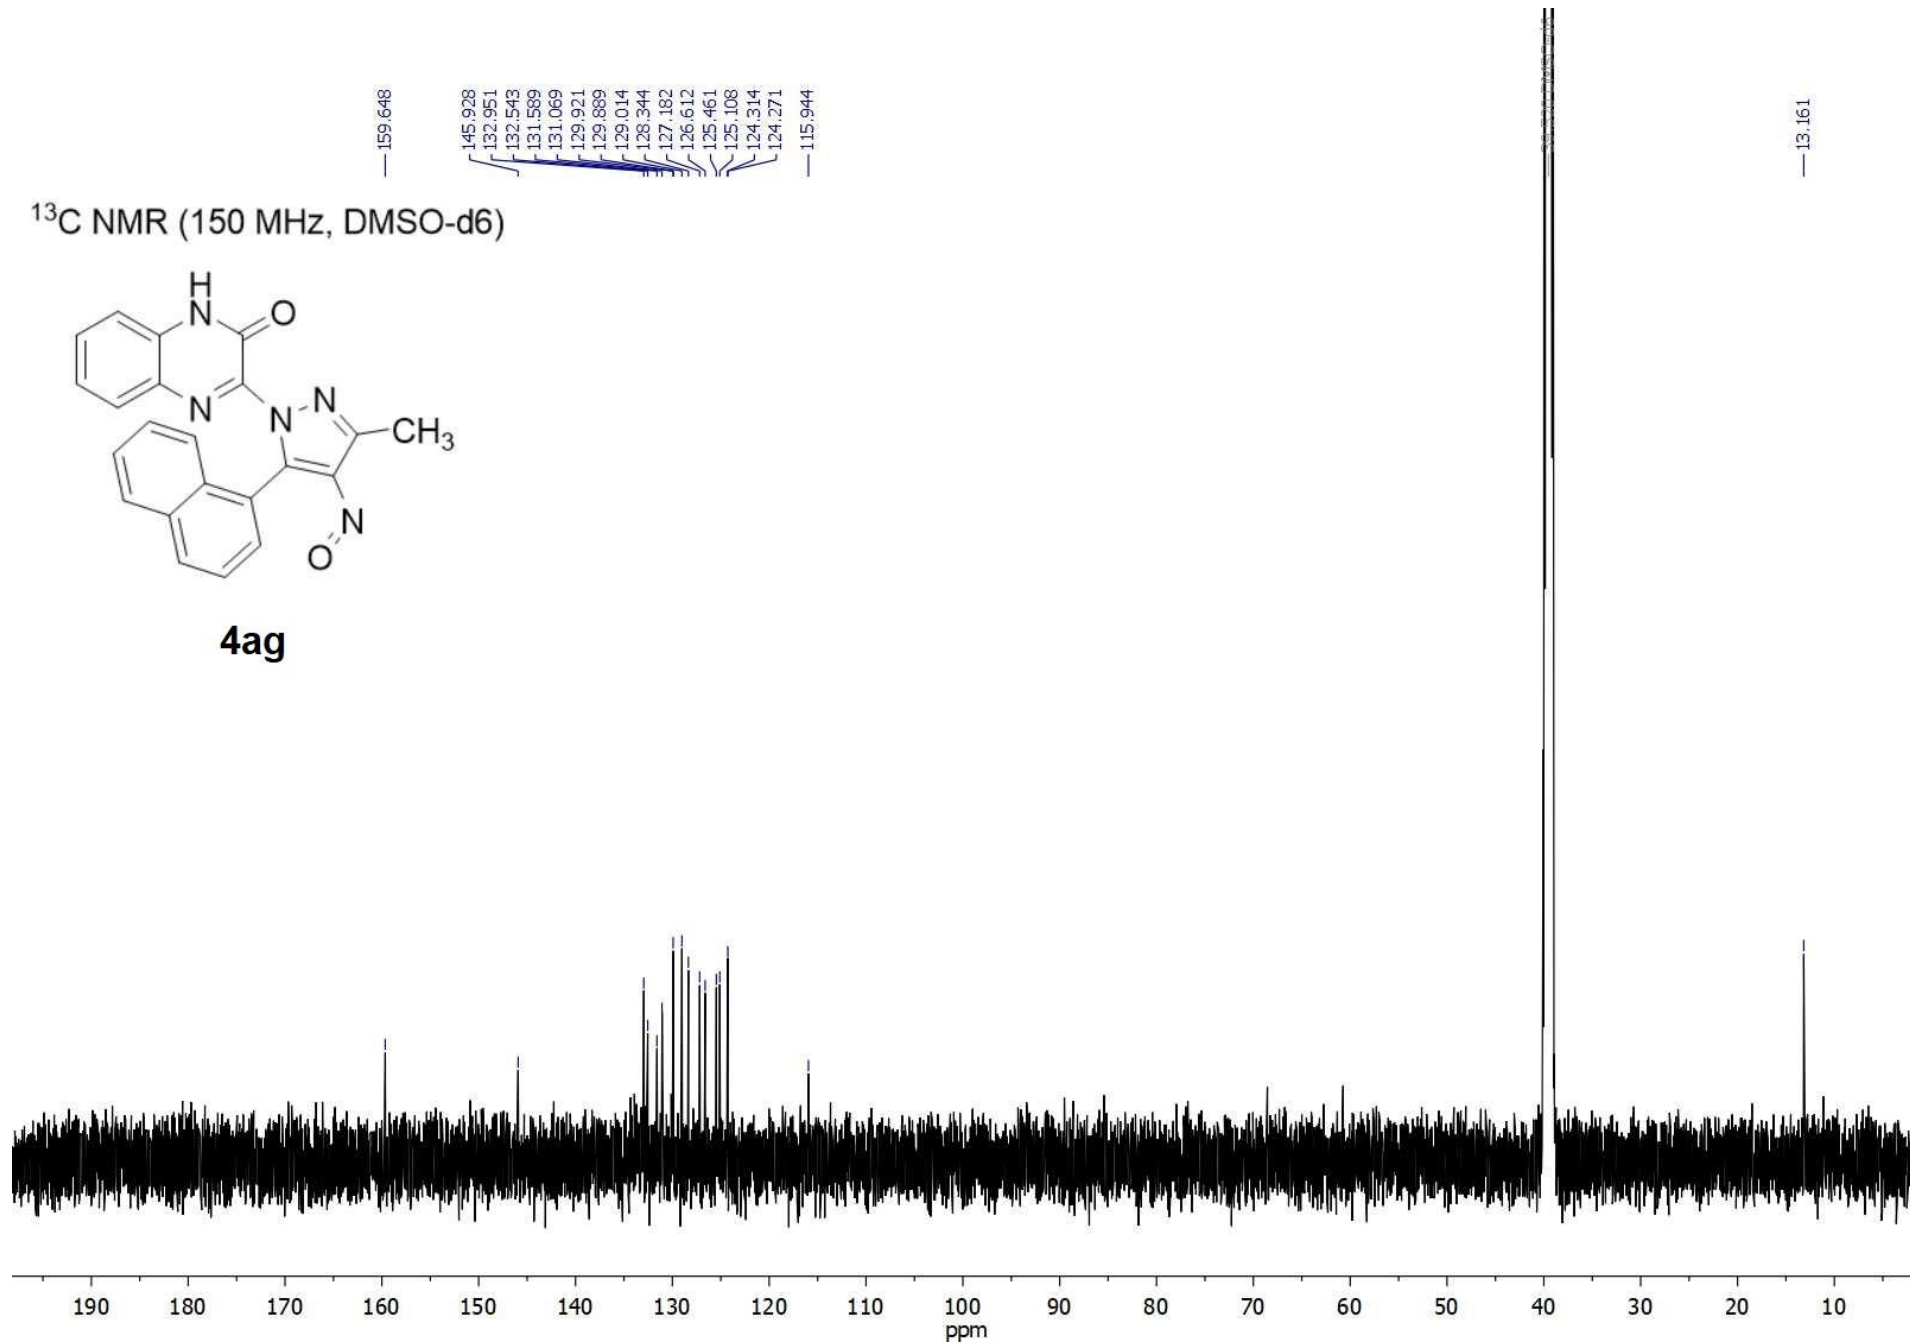

<sup>1</sup>H NMR (600 MHz, DMSO-d6)

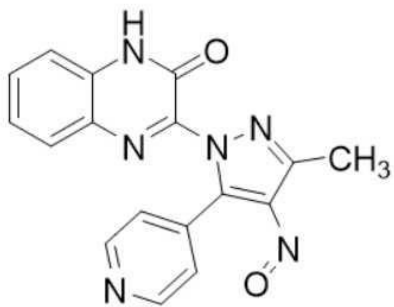

**4ah**

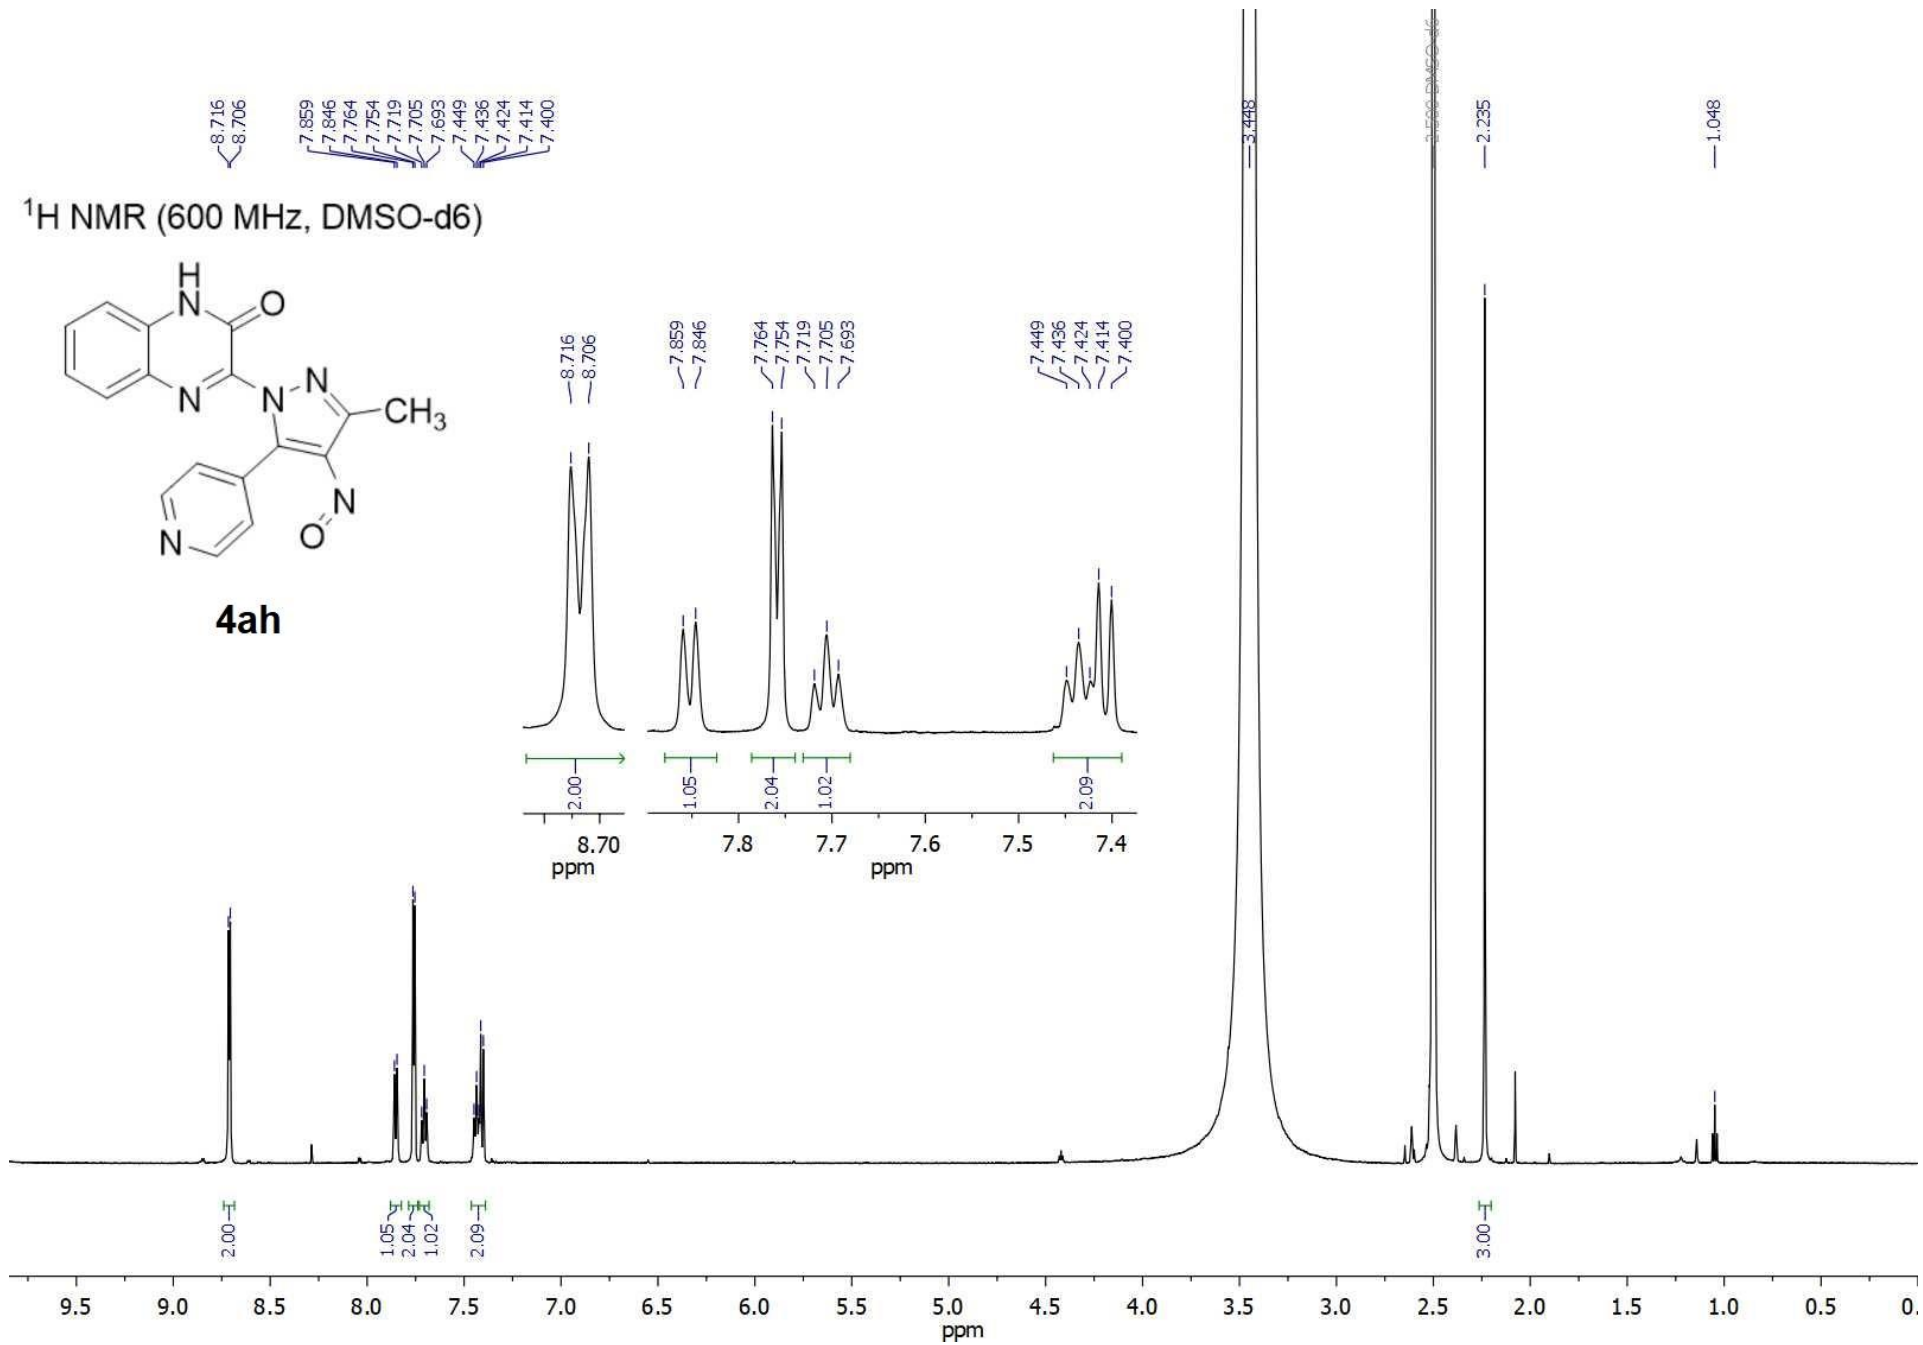

<sup>13</sup>C NMR (150 MHz, DMSO-d6)

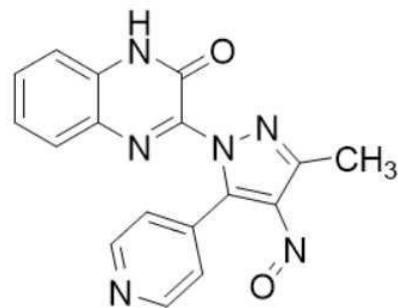

**4h**

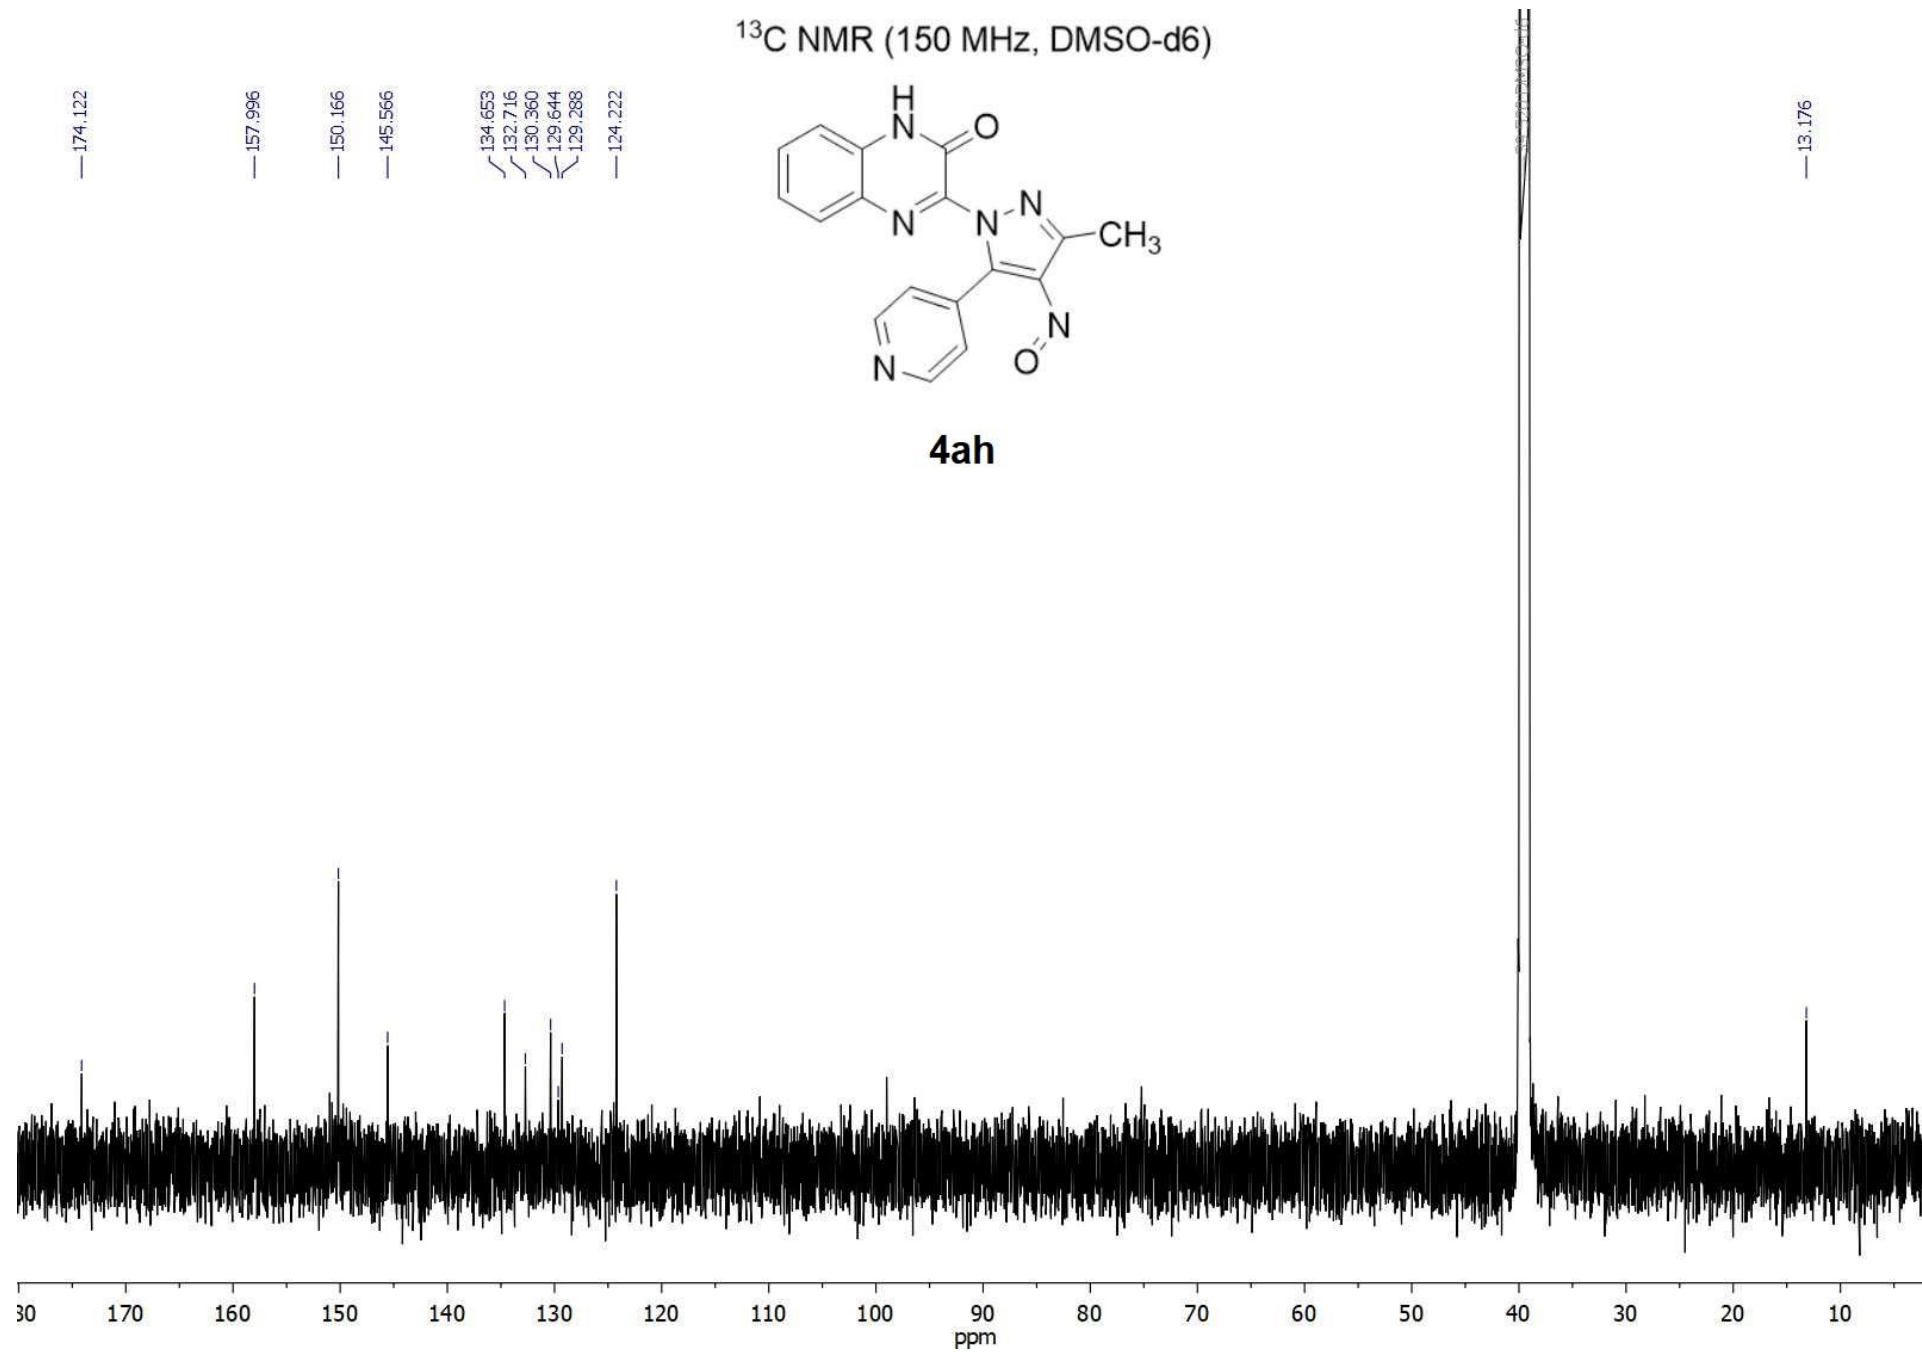

<sup>1</sup>H NMR (600 MHz, DMSO-d<sub>6</sub>)

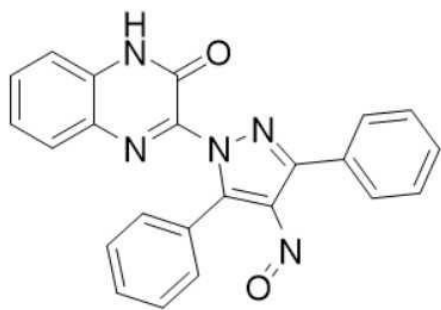

**4ai**

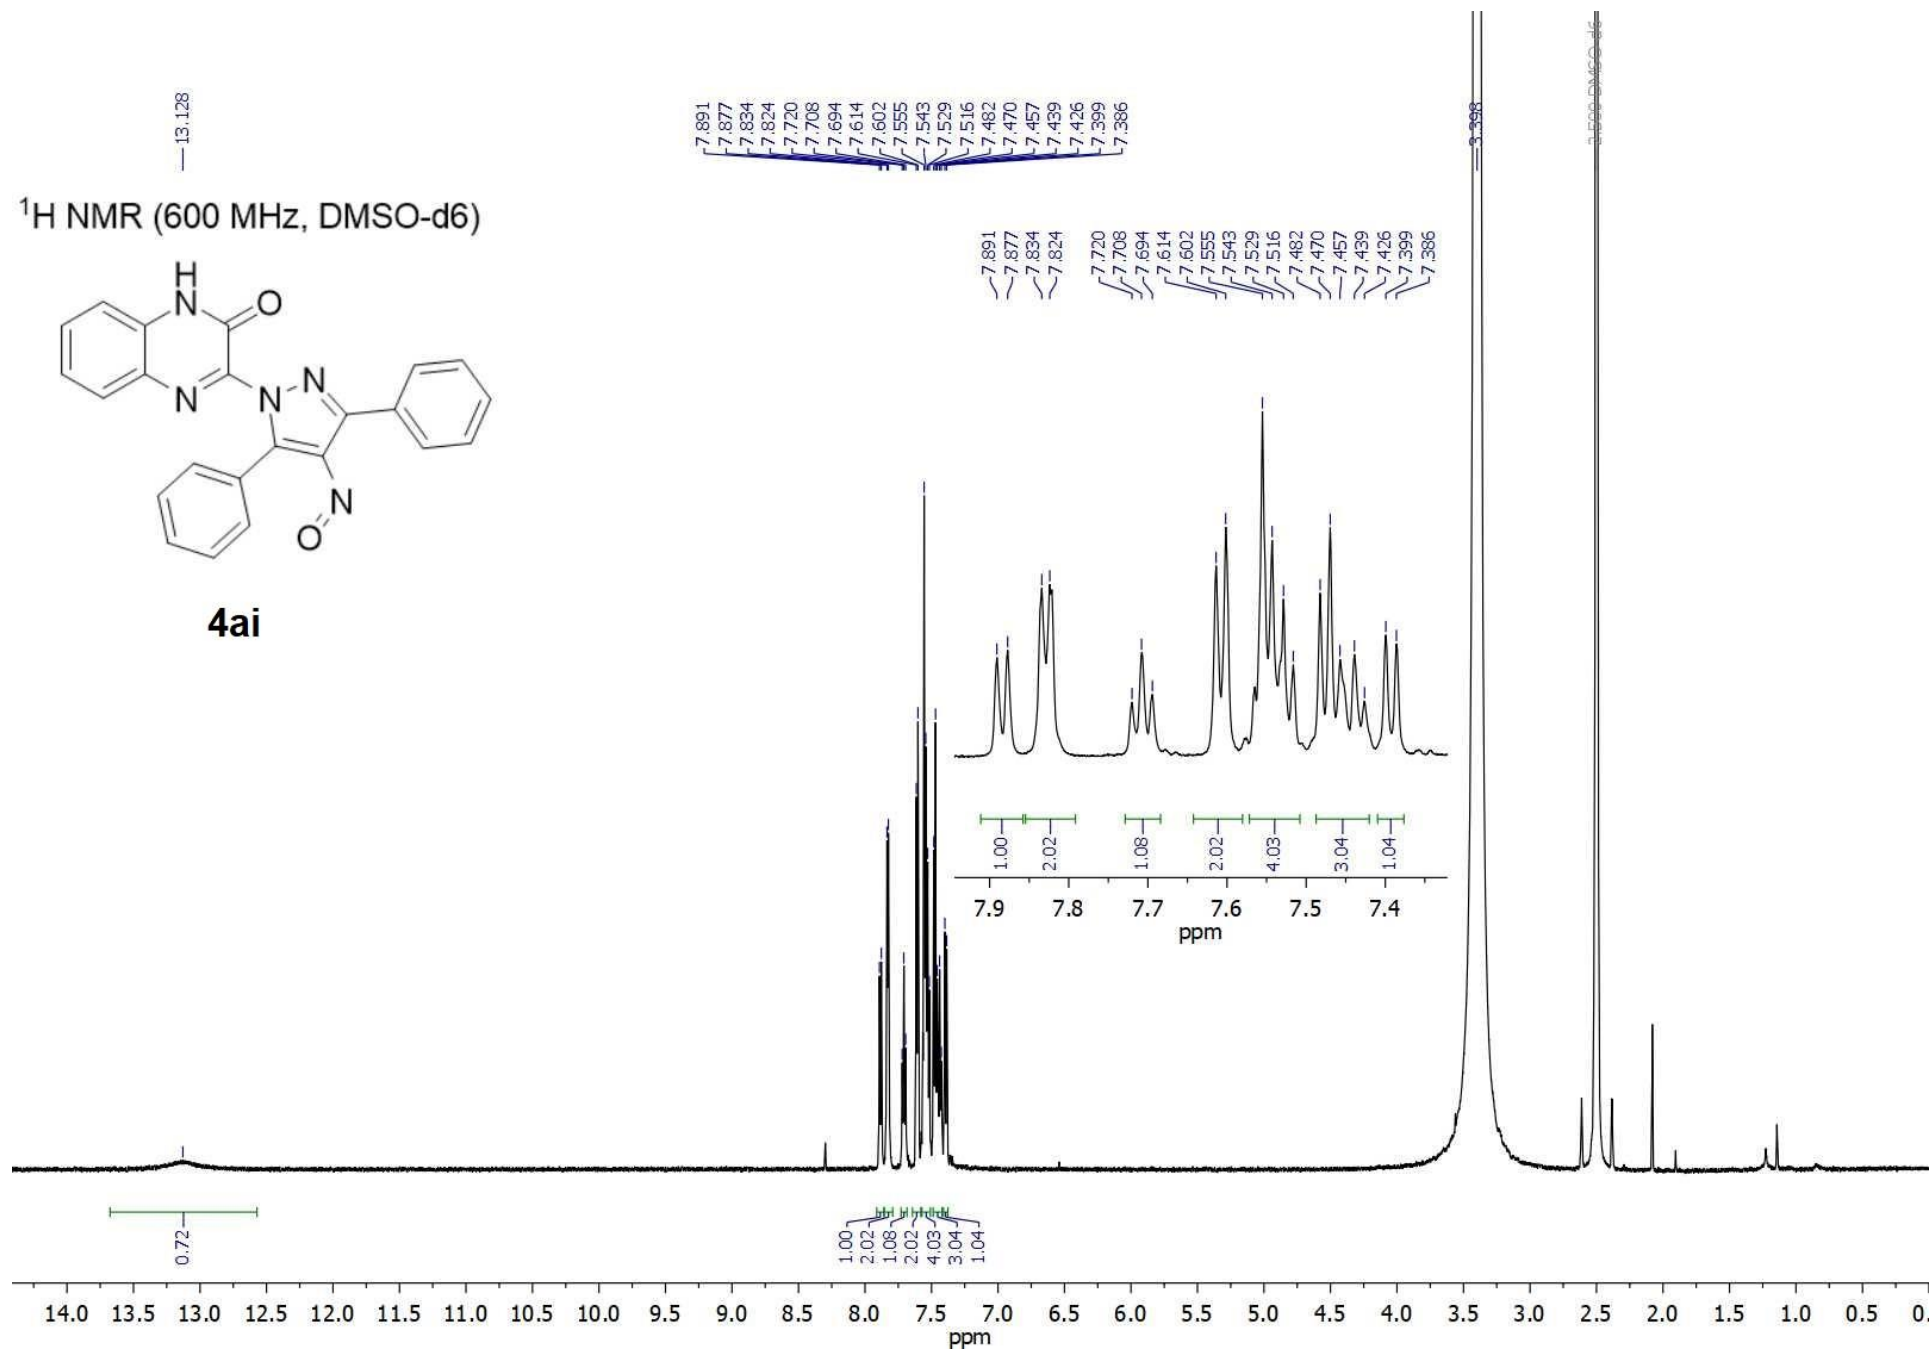

$^{13}\text{C}$  NMR (150 MHz, DMSO-d<sub>6</sub>)

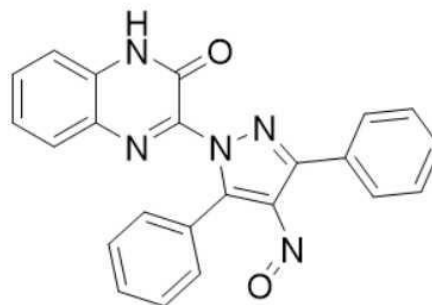

**4ai**

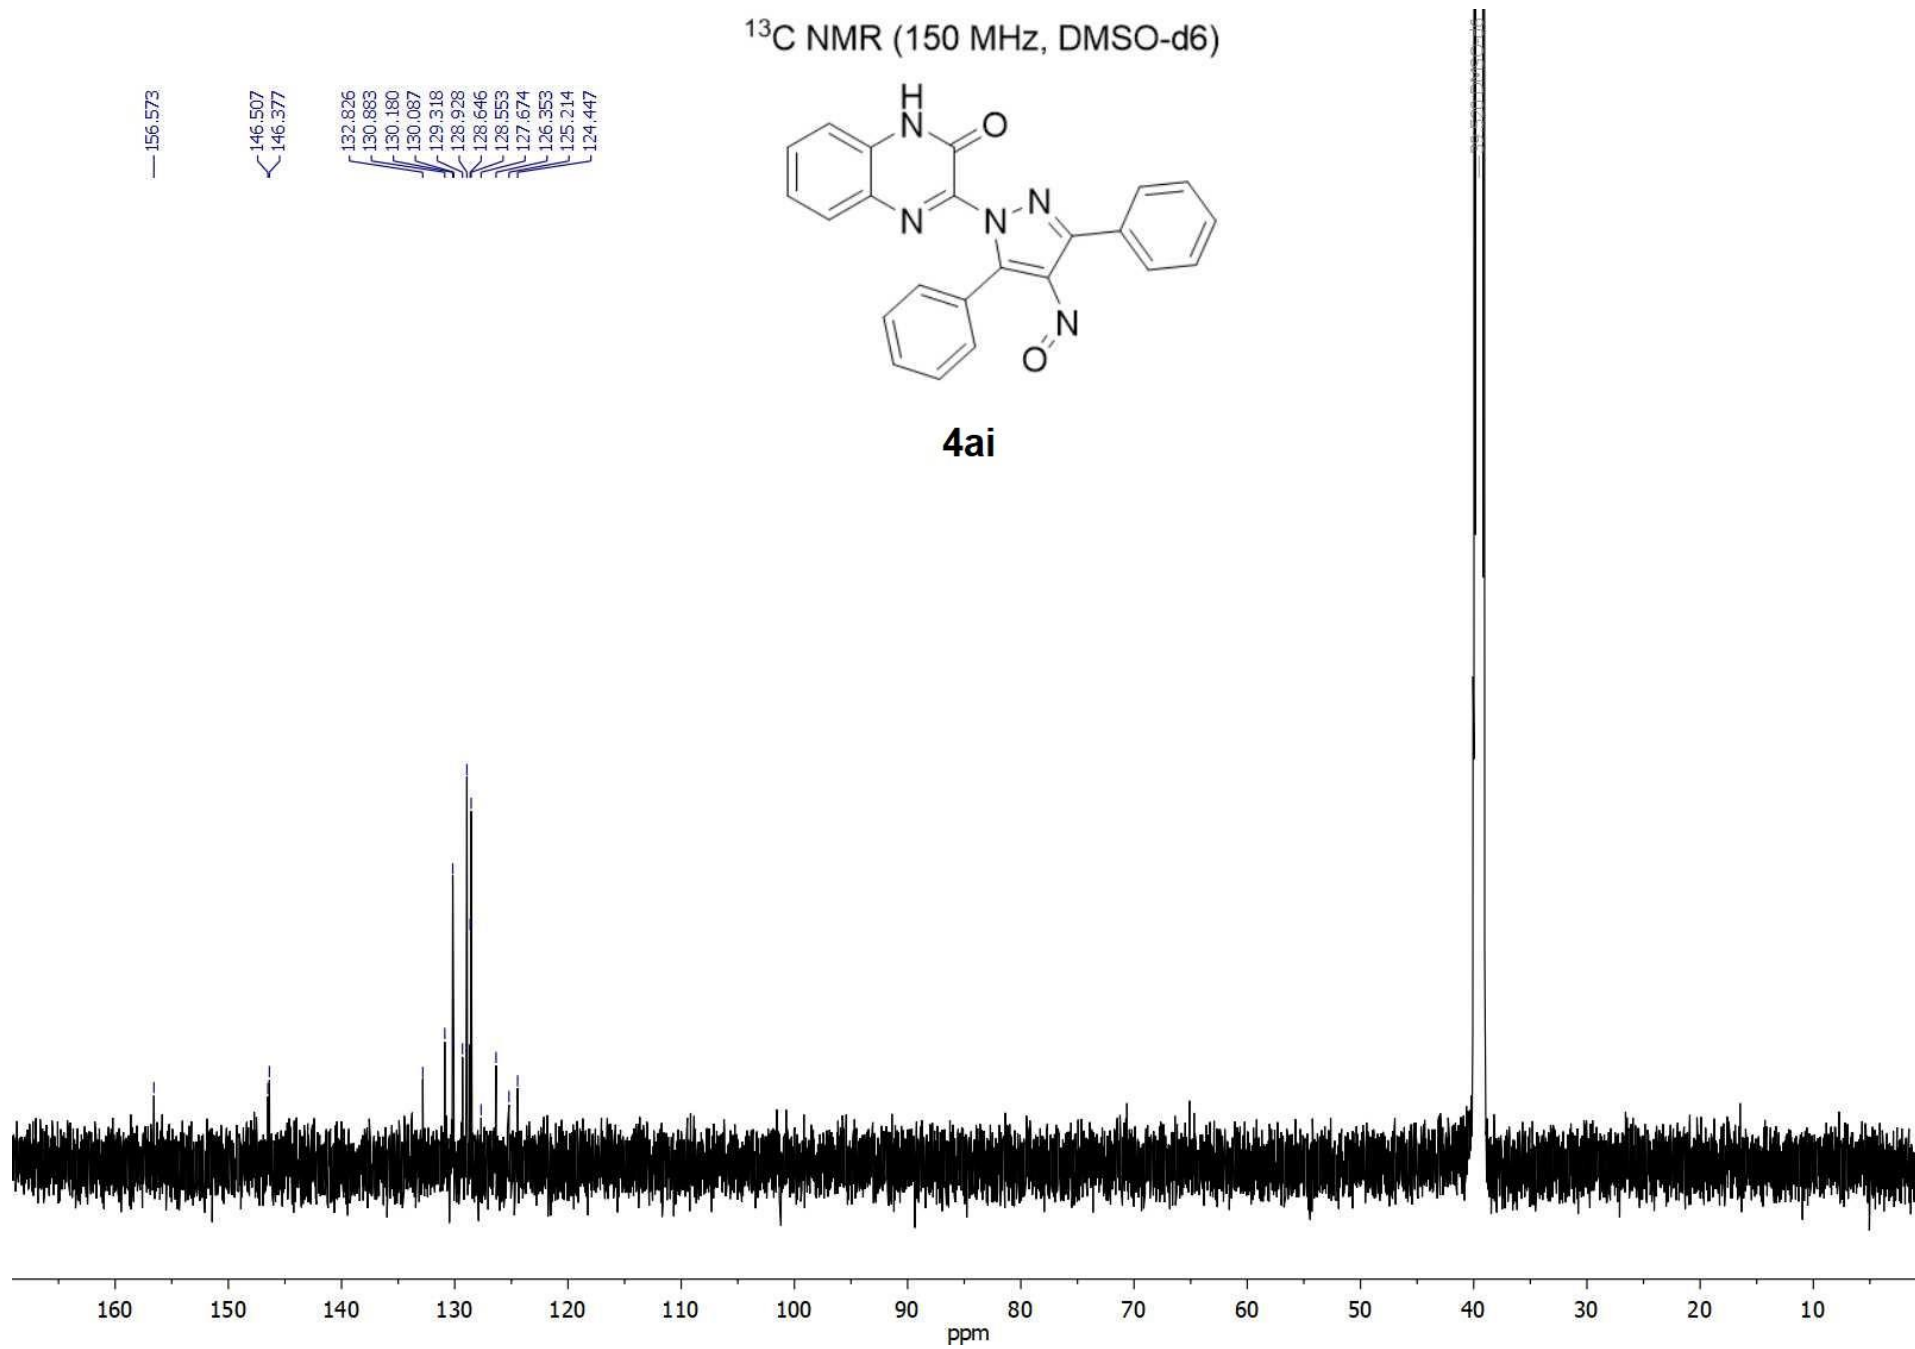



<sup>1</sup>H NMR (600 MHz, CDCl<sub>3</sub>)

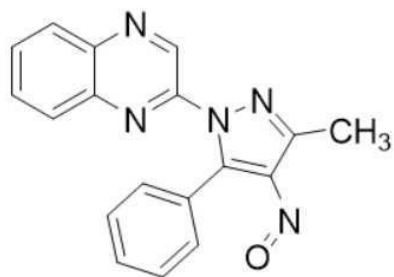

**4bb**

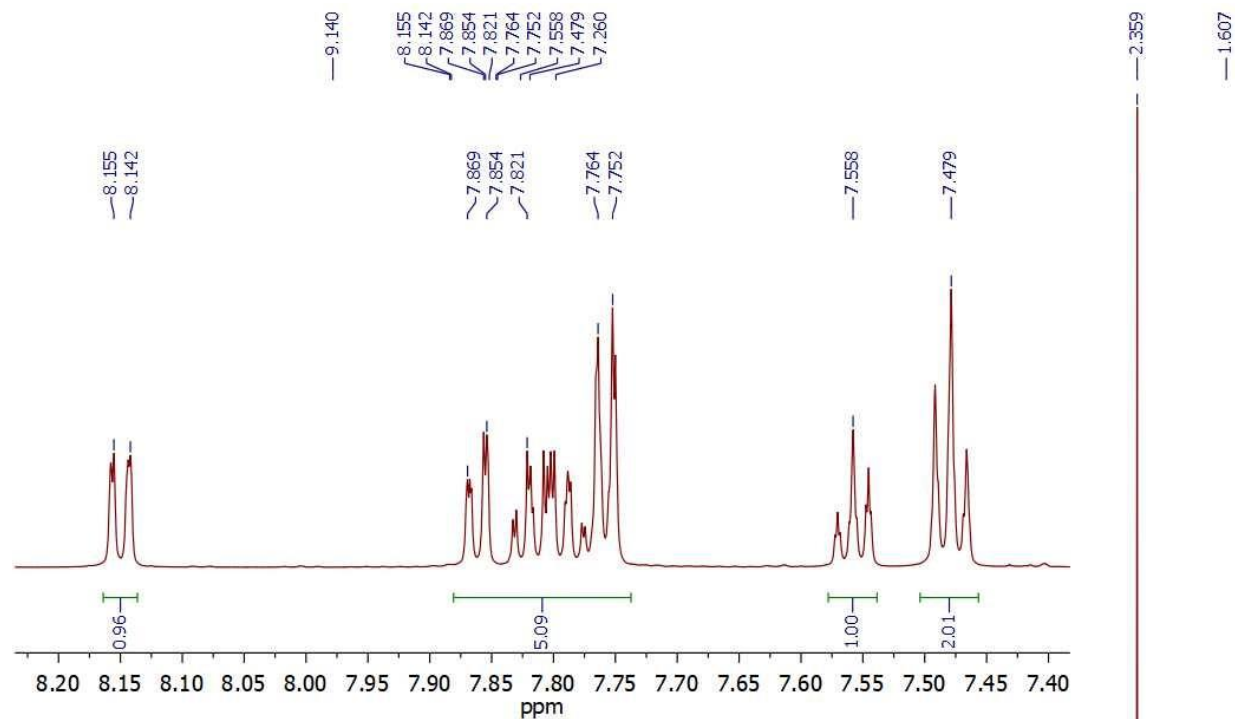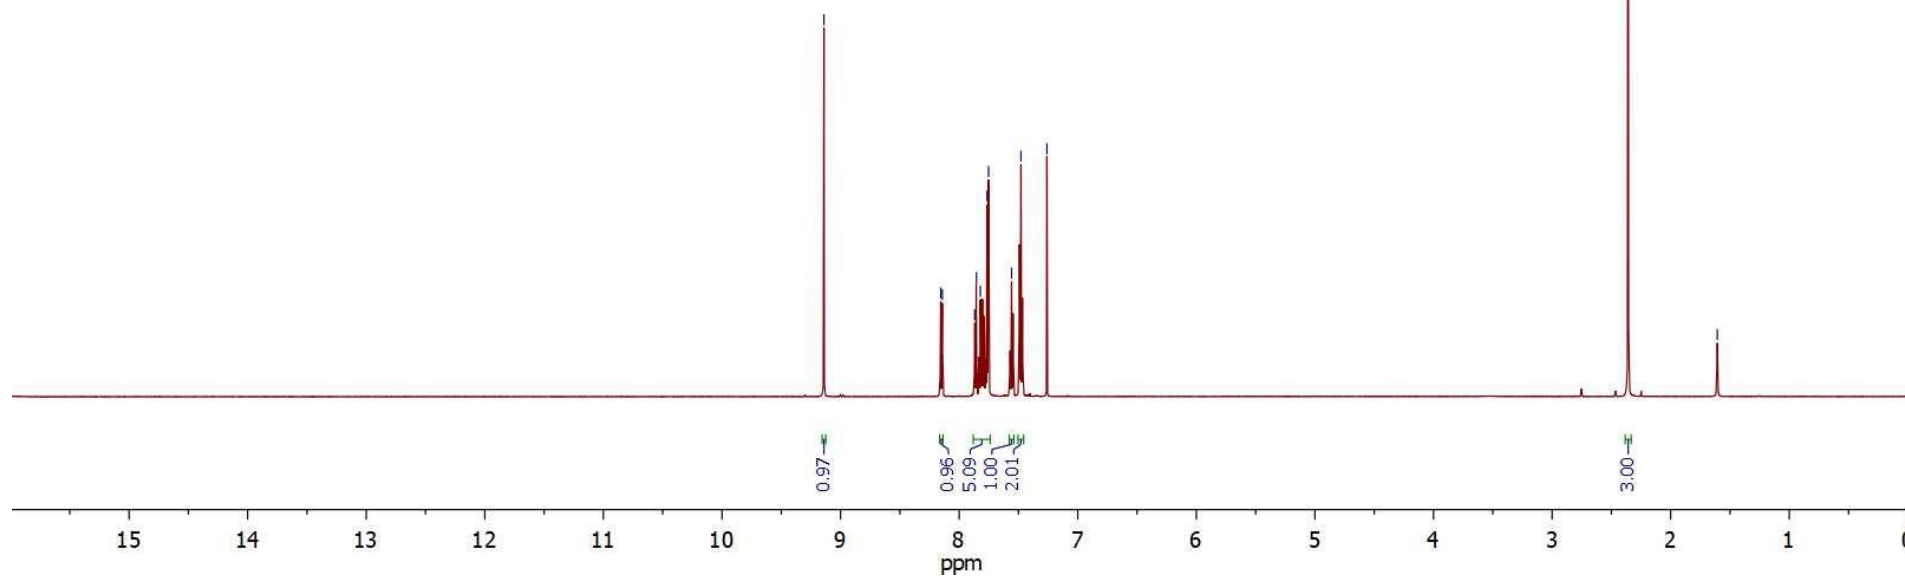



<sup>13</sup>C NMR (150 MHz, CDCl<sub>3</sub>)

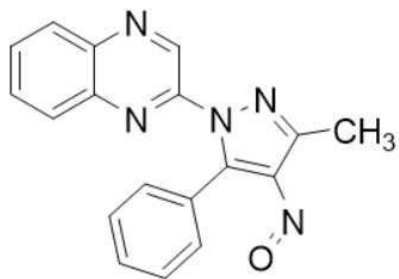

**4bb**

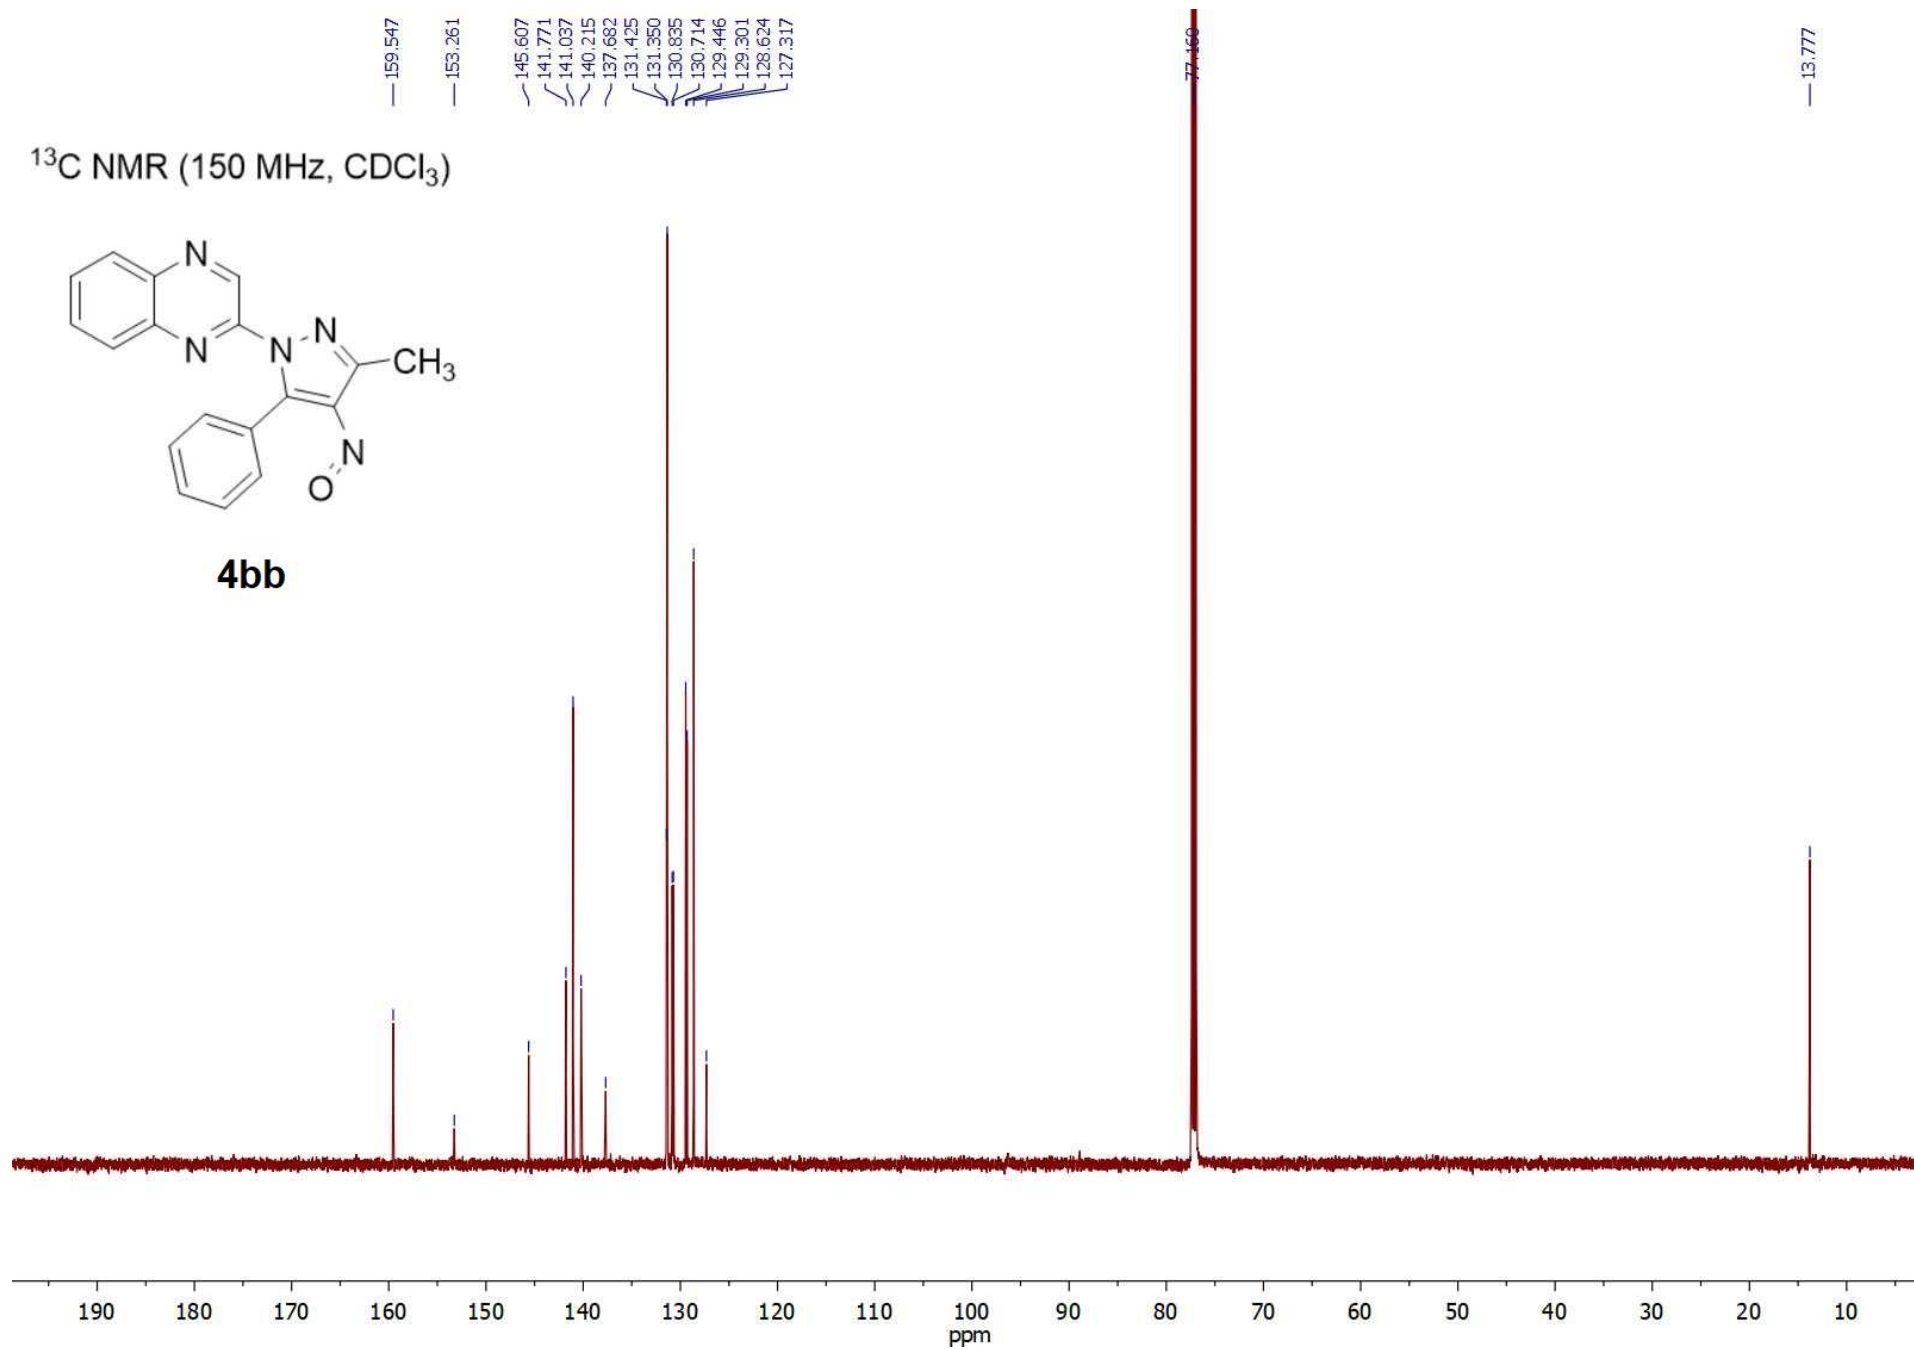

HSQC (CDCl<sub>3</sub>)

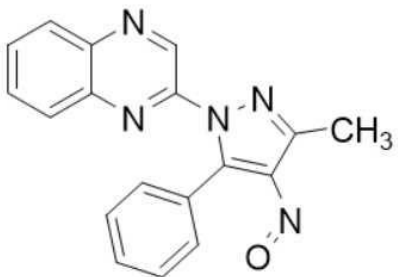

4b

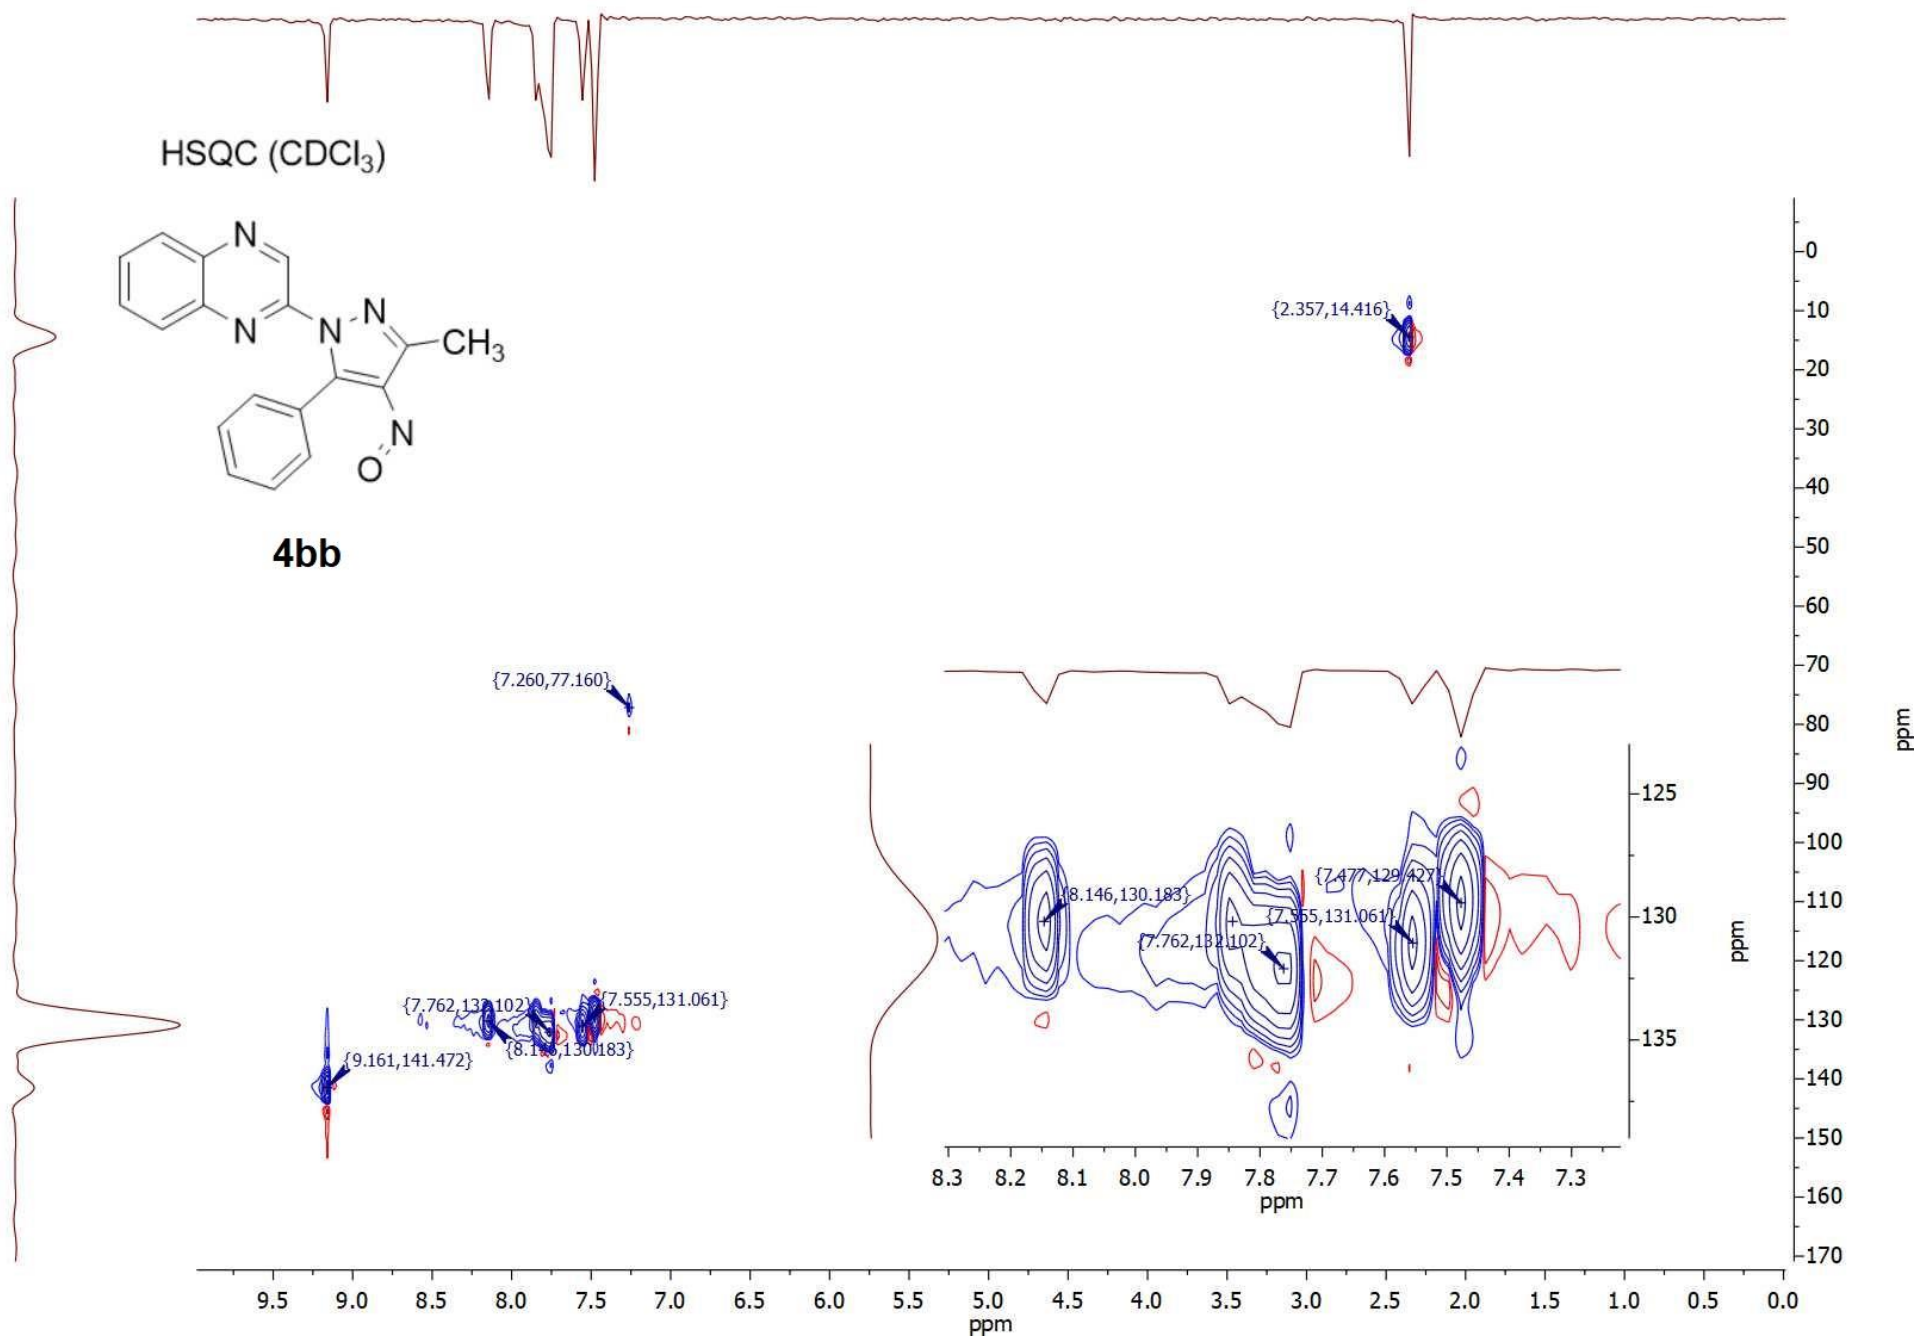

$^1\text{H}$  NMR (600 MHz,  $\text{CDCl}_3$ )

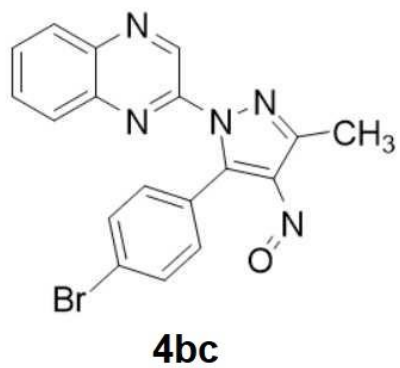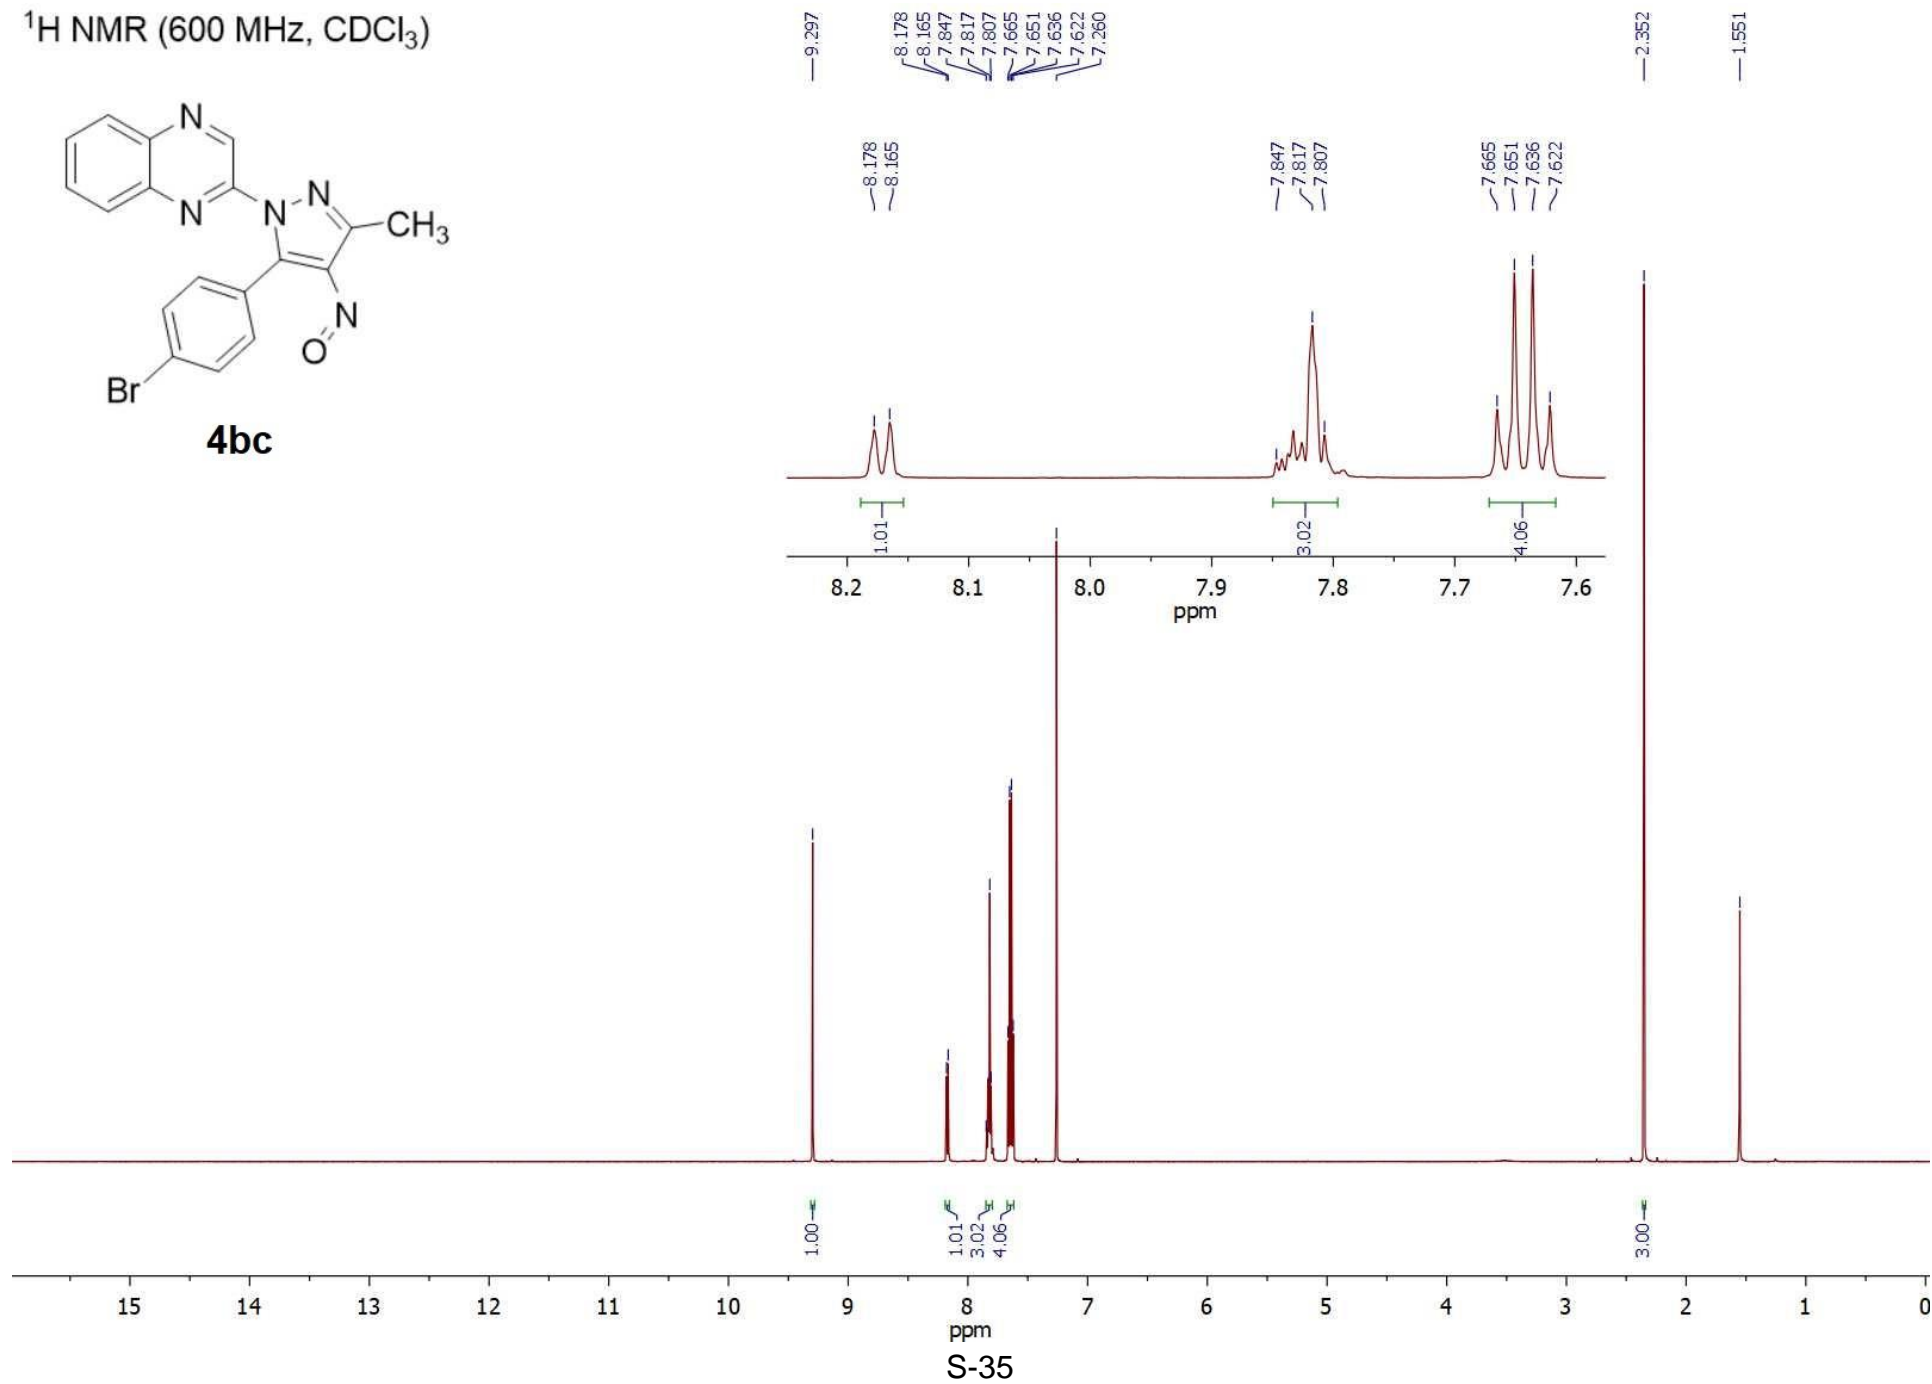

<sup>13</sup>C NMR (150 MHz, CDCl<sub>3</sub>)

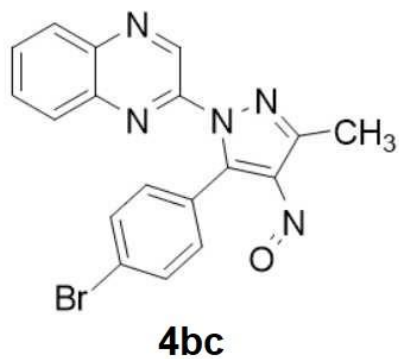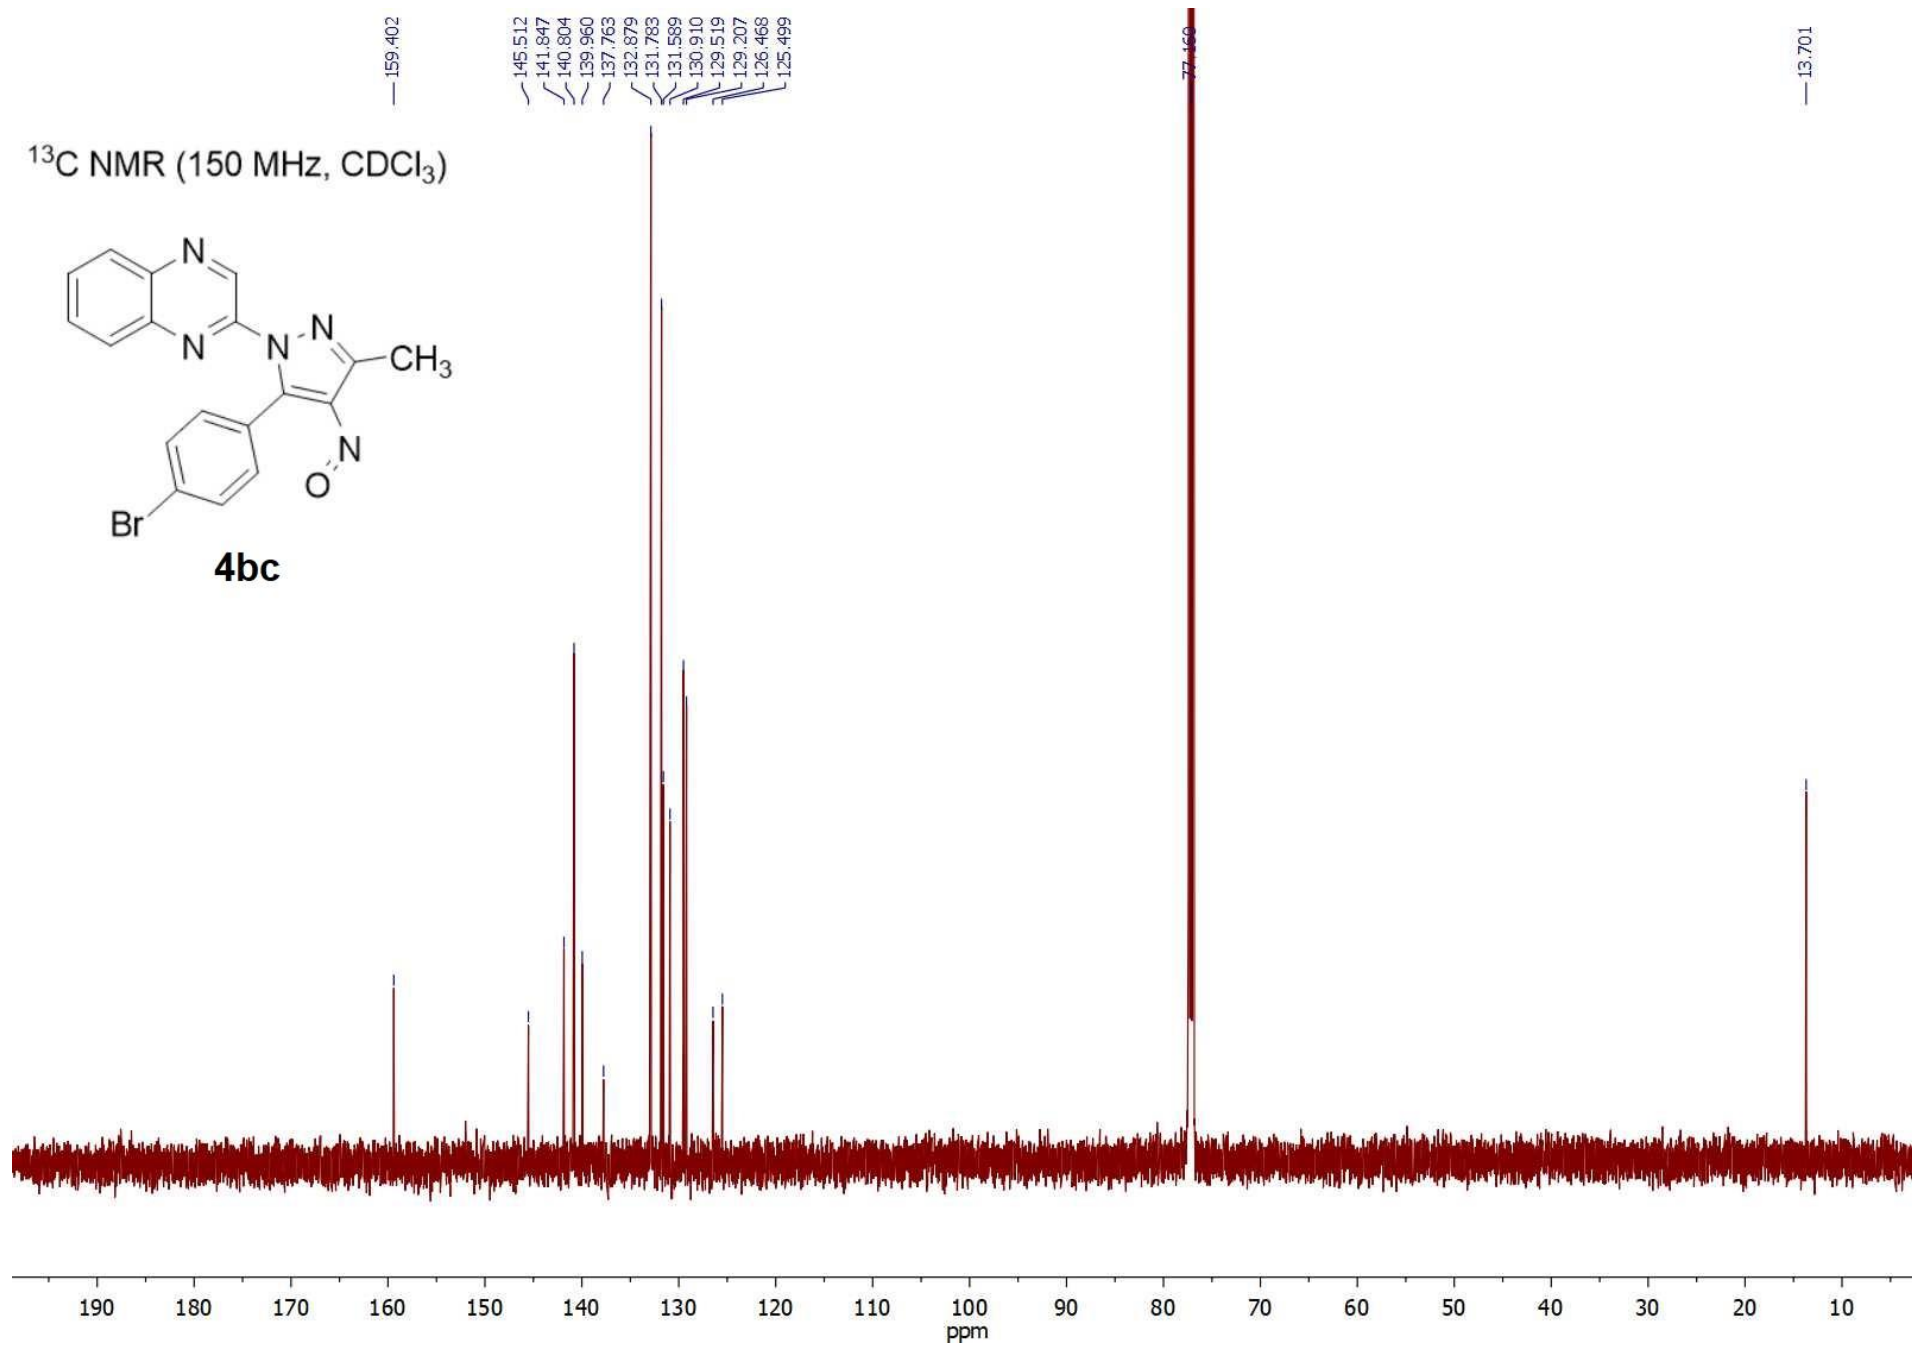

# HMBC (CDCl<sub>3</sub>)

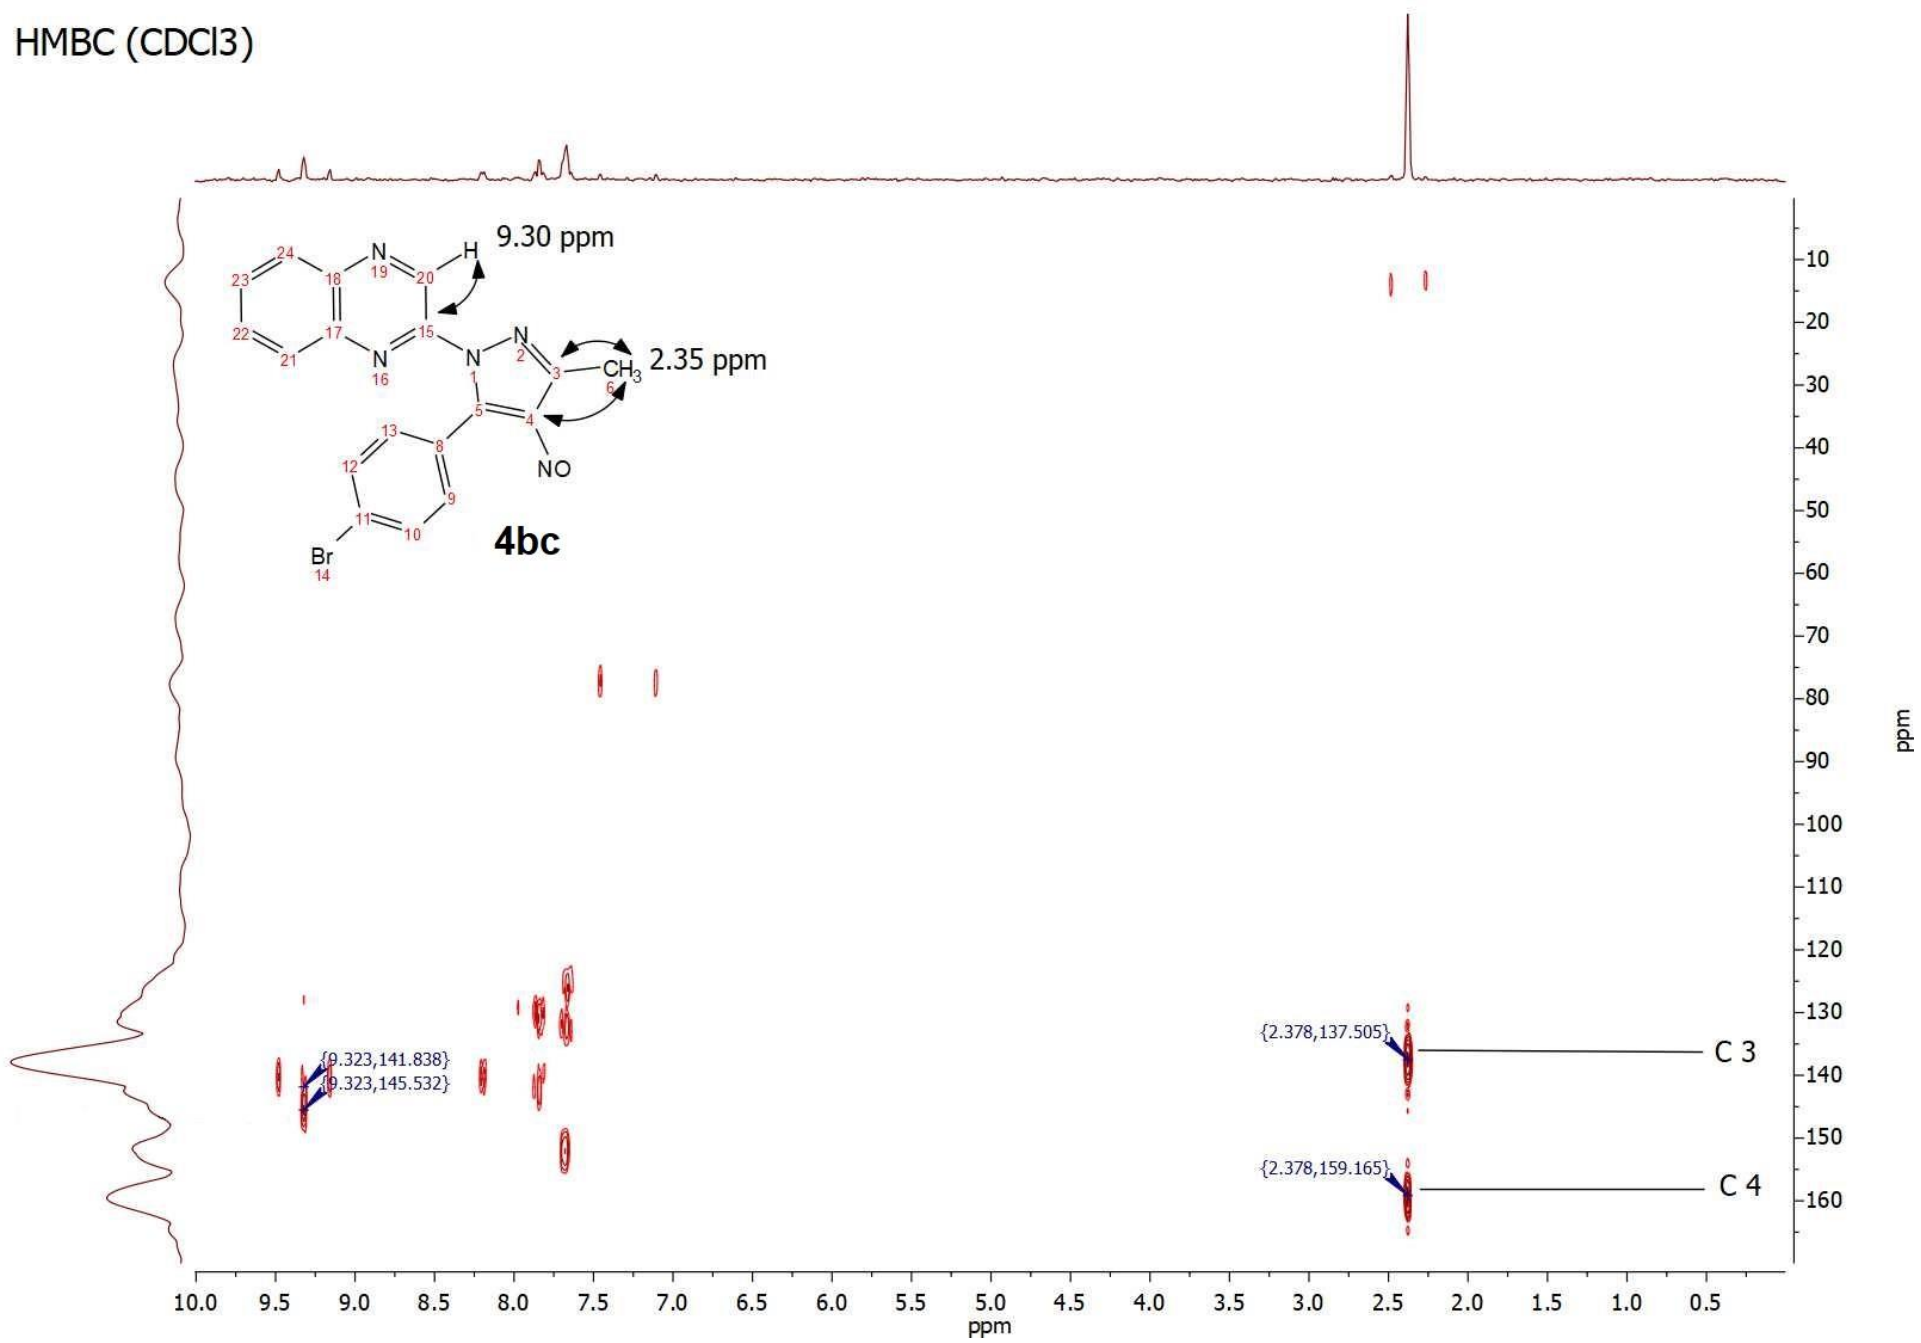

HSQC (CDCl<sub>3</sub>)

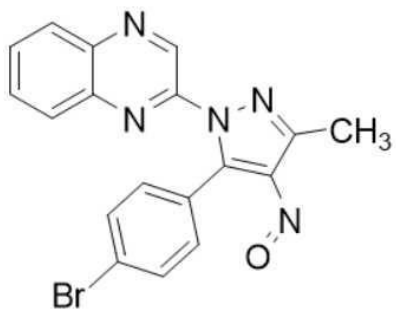

**4bc**

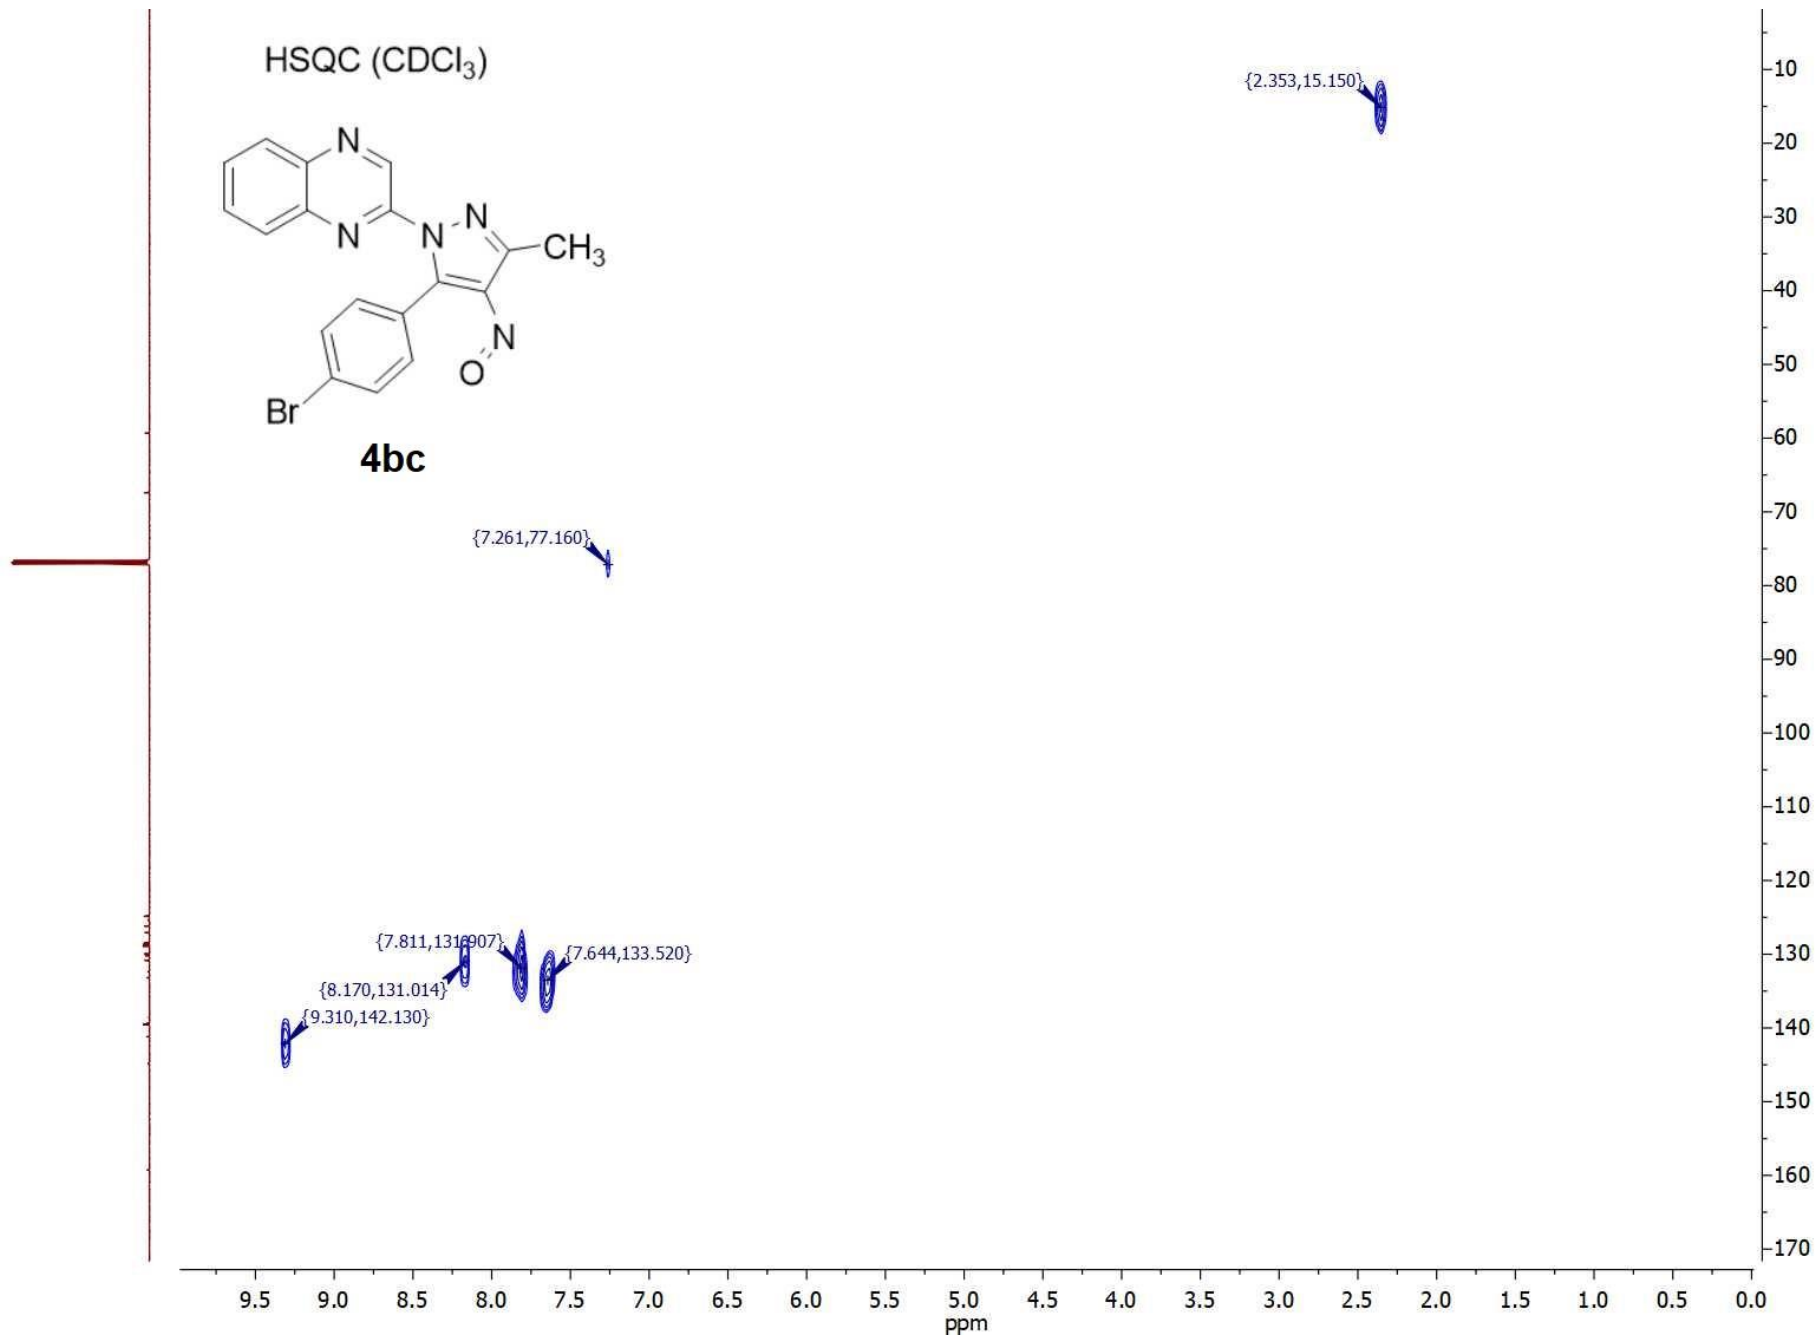

$^1\text{H}$  NMR (600 MHz,  $\text{CDCl}_3$ )

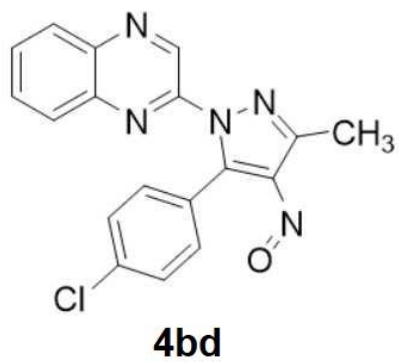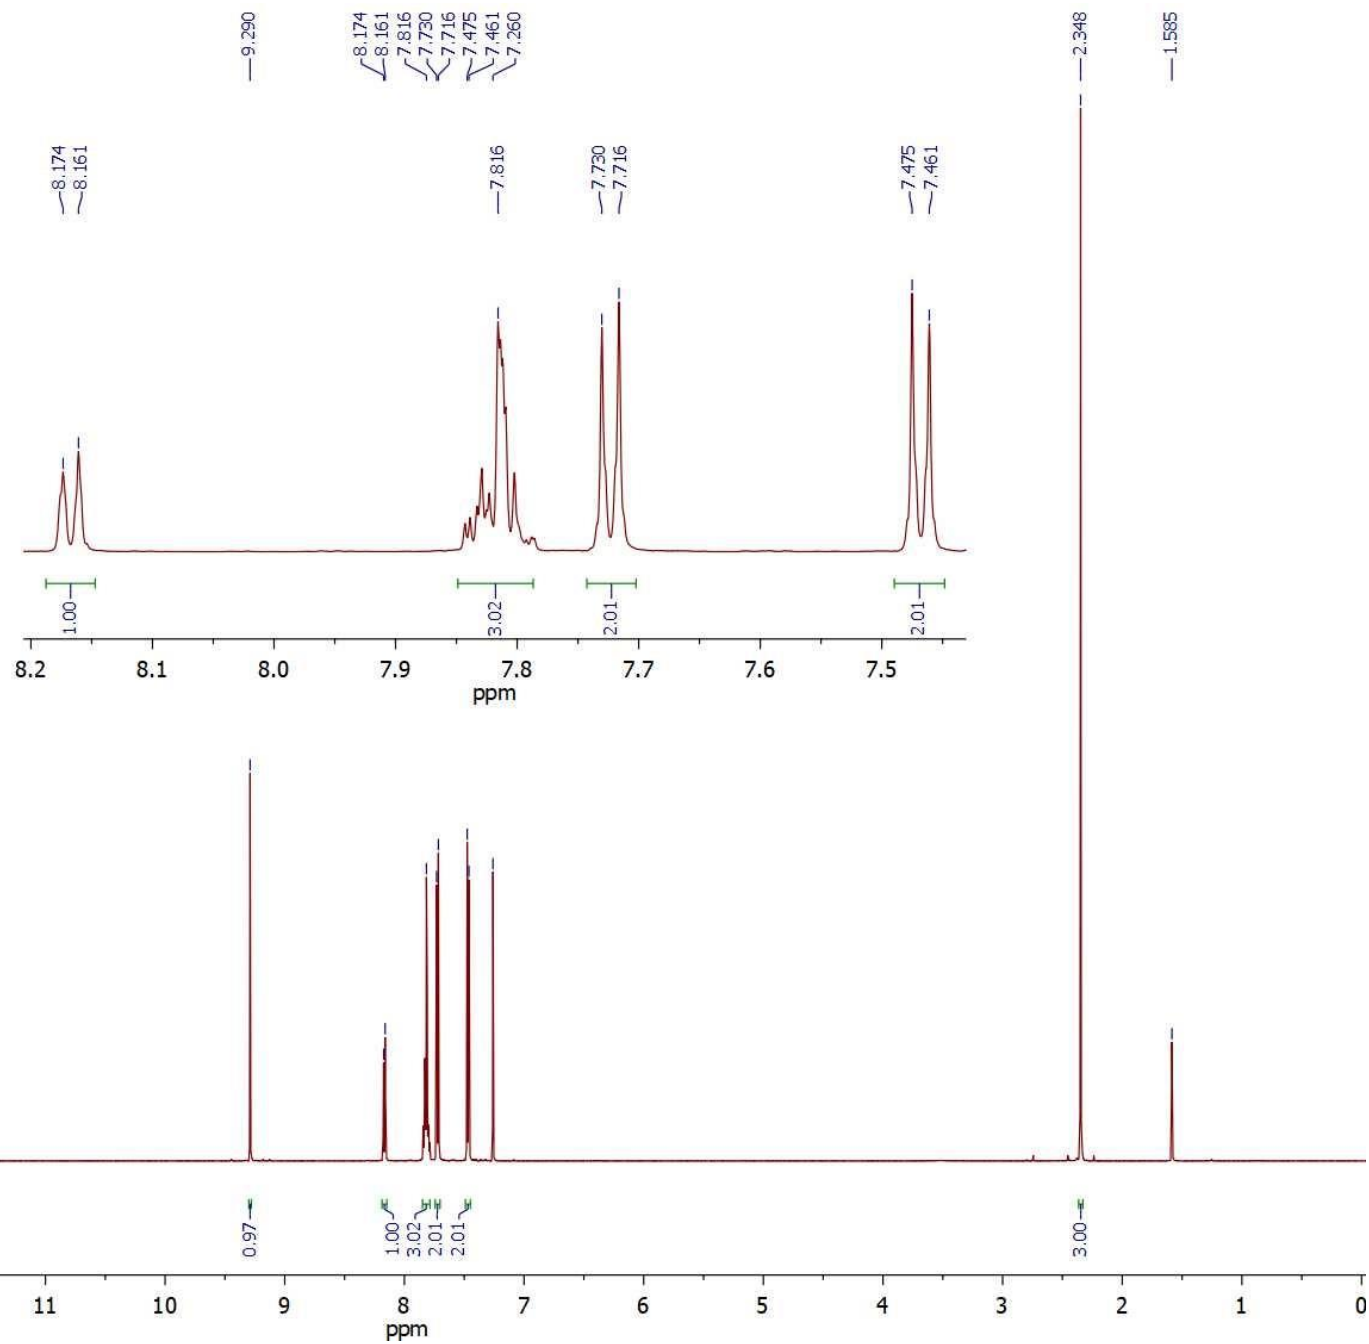

$^{13}\text{C}$  NMR (150 MHz,  $\text{CDCl}_3$ )

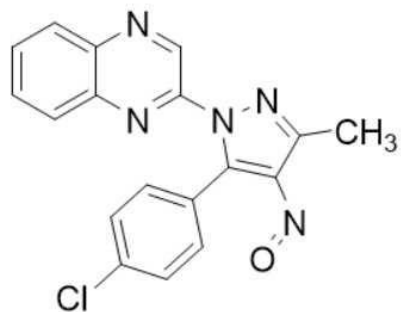

**4bd**

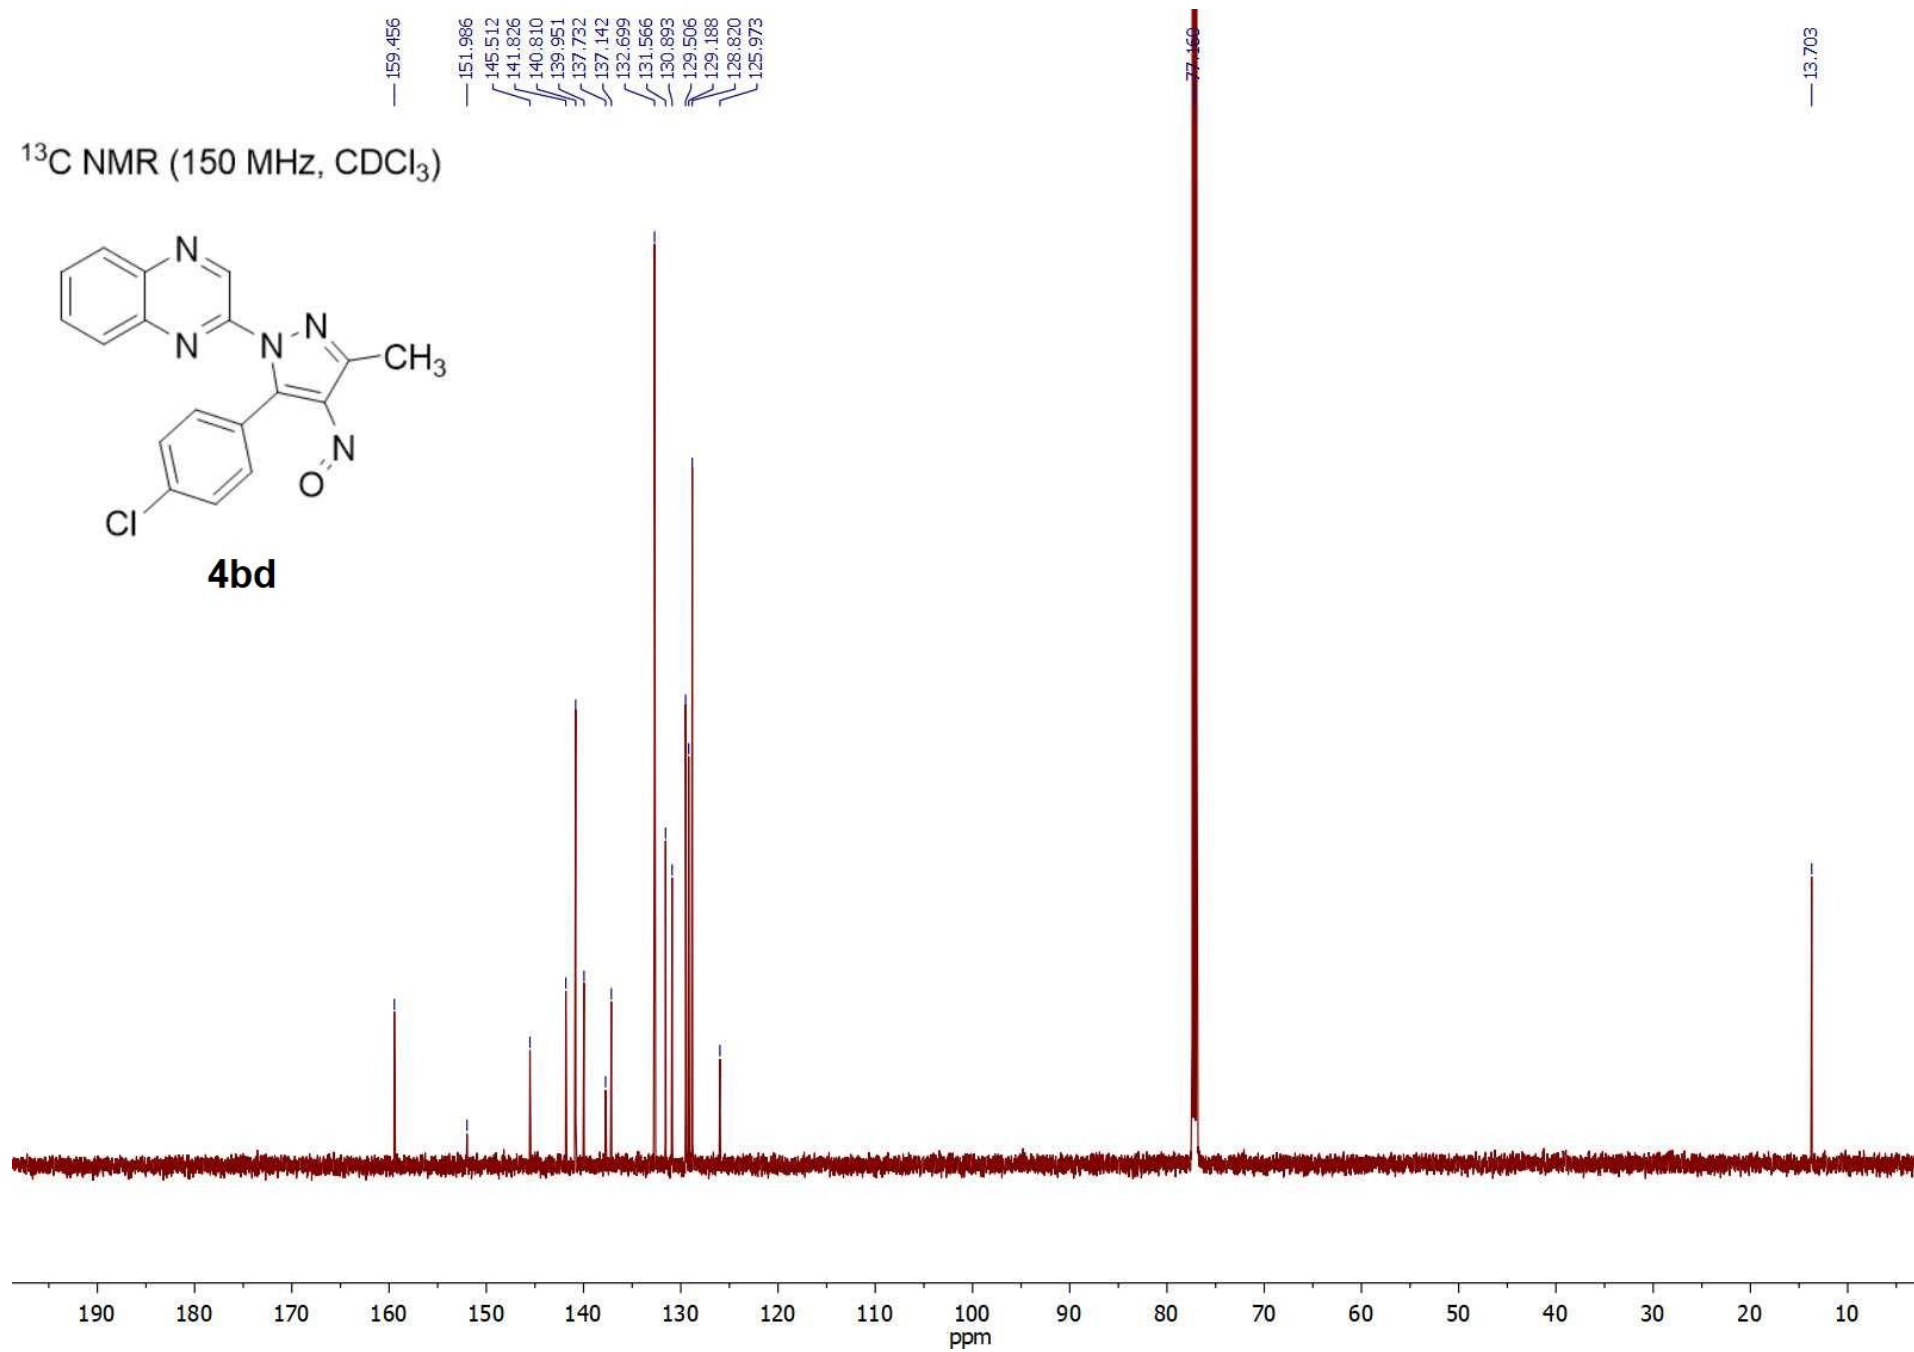

S-40



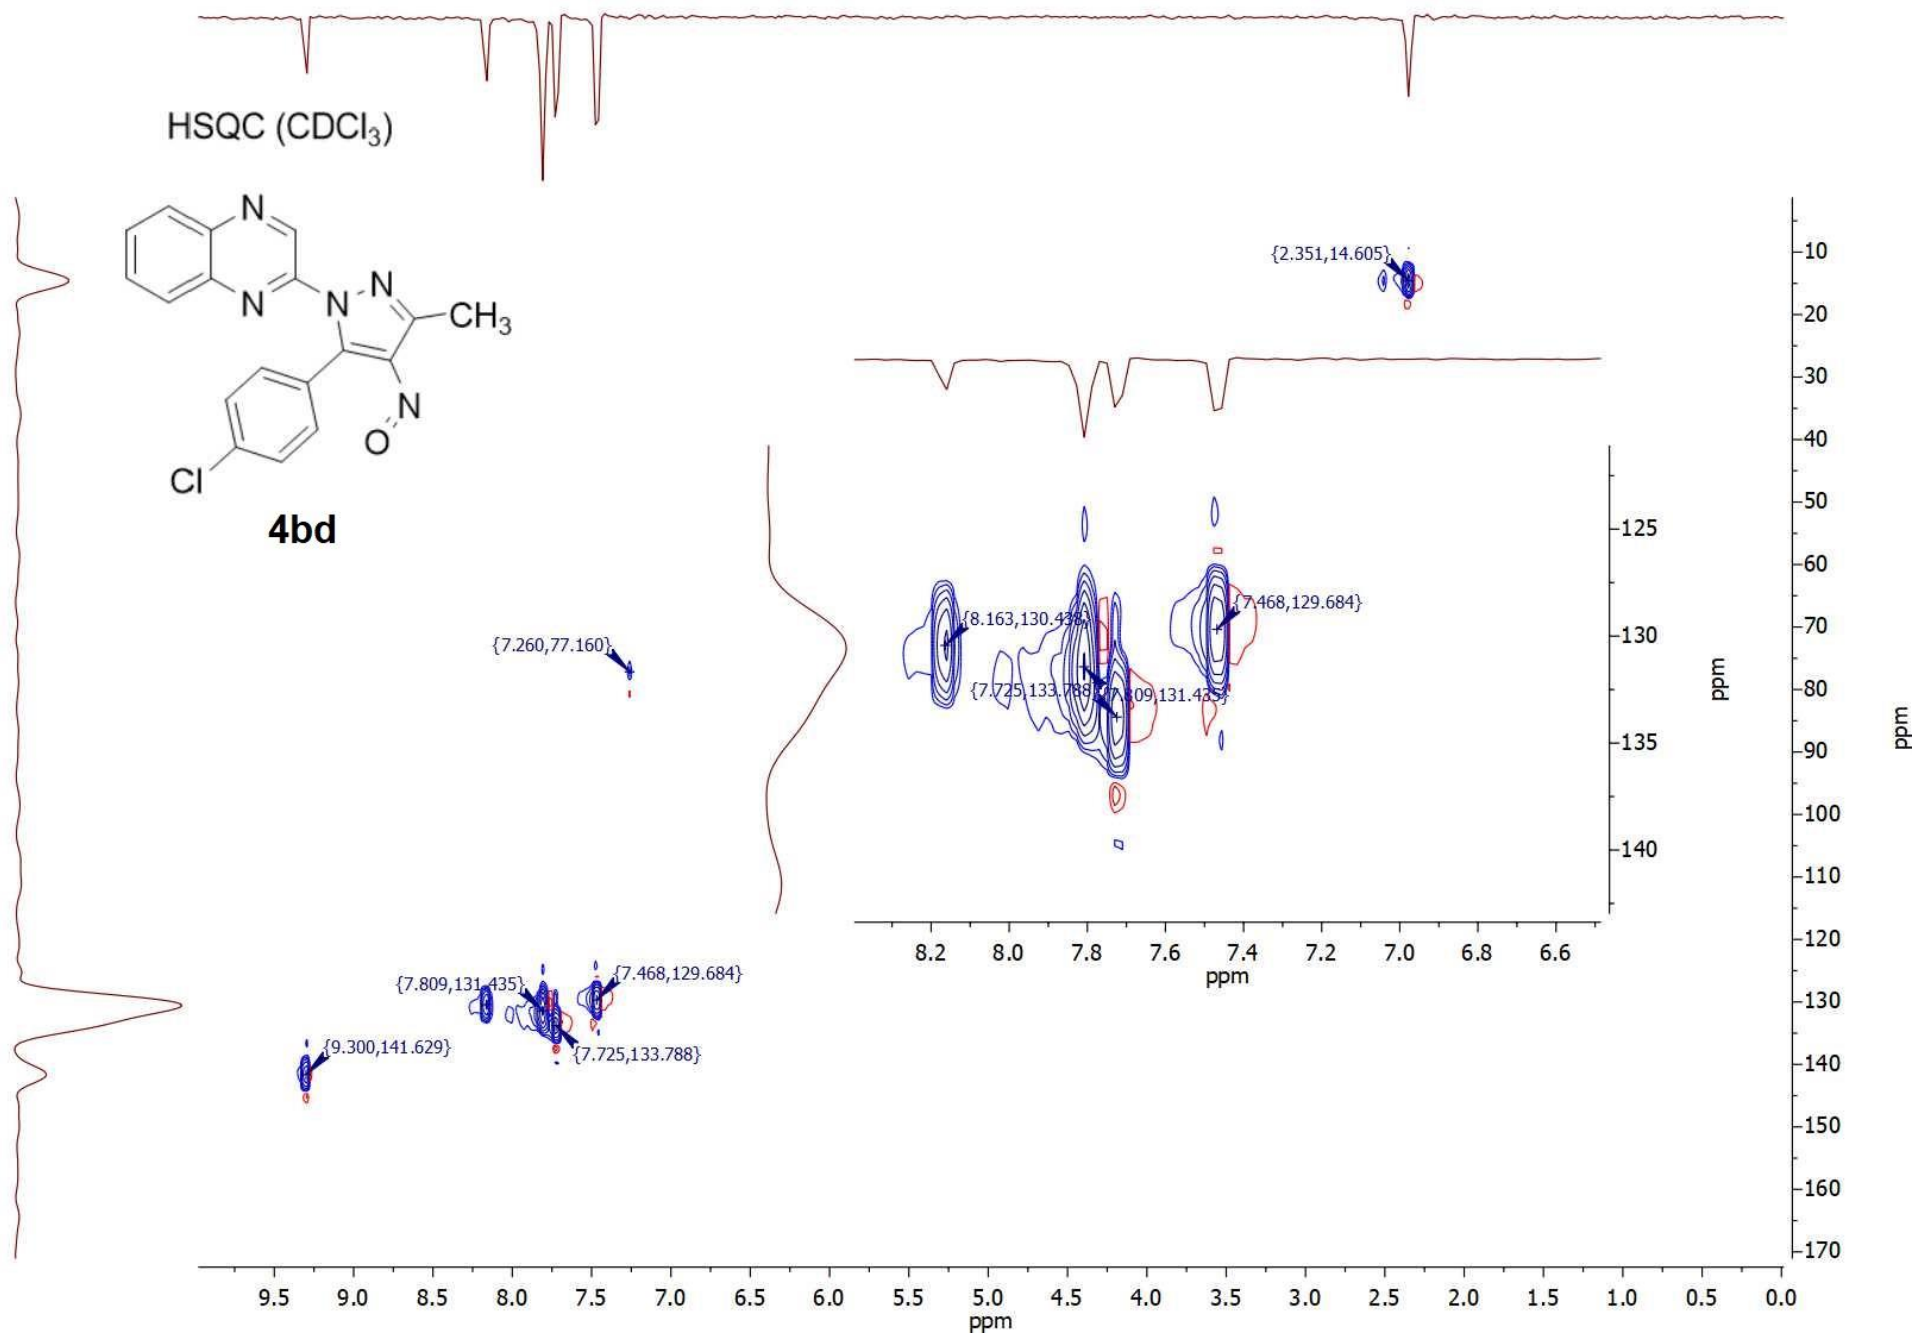

$^1\text{H}$  NMR (600 MHz,  $\text{CDCl}_3$ )

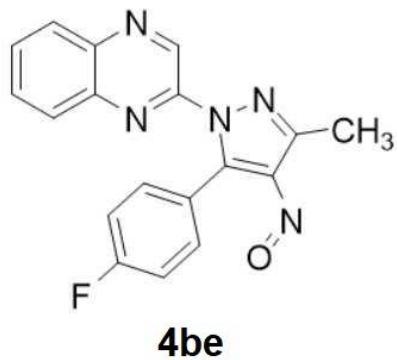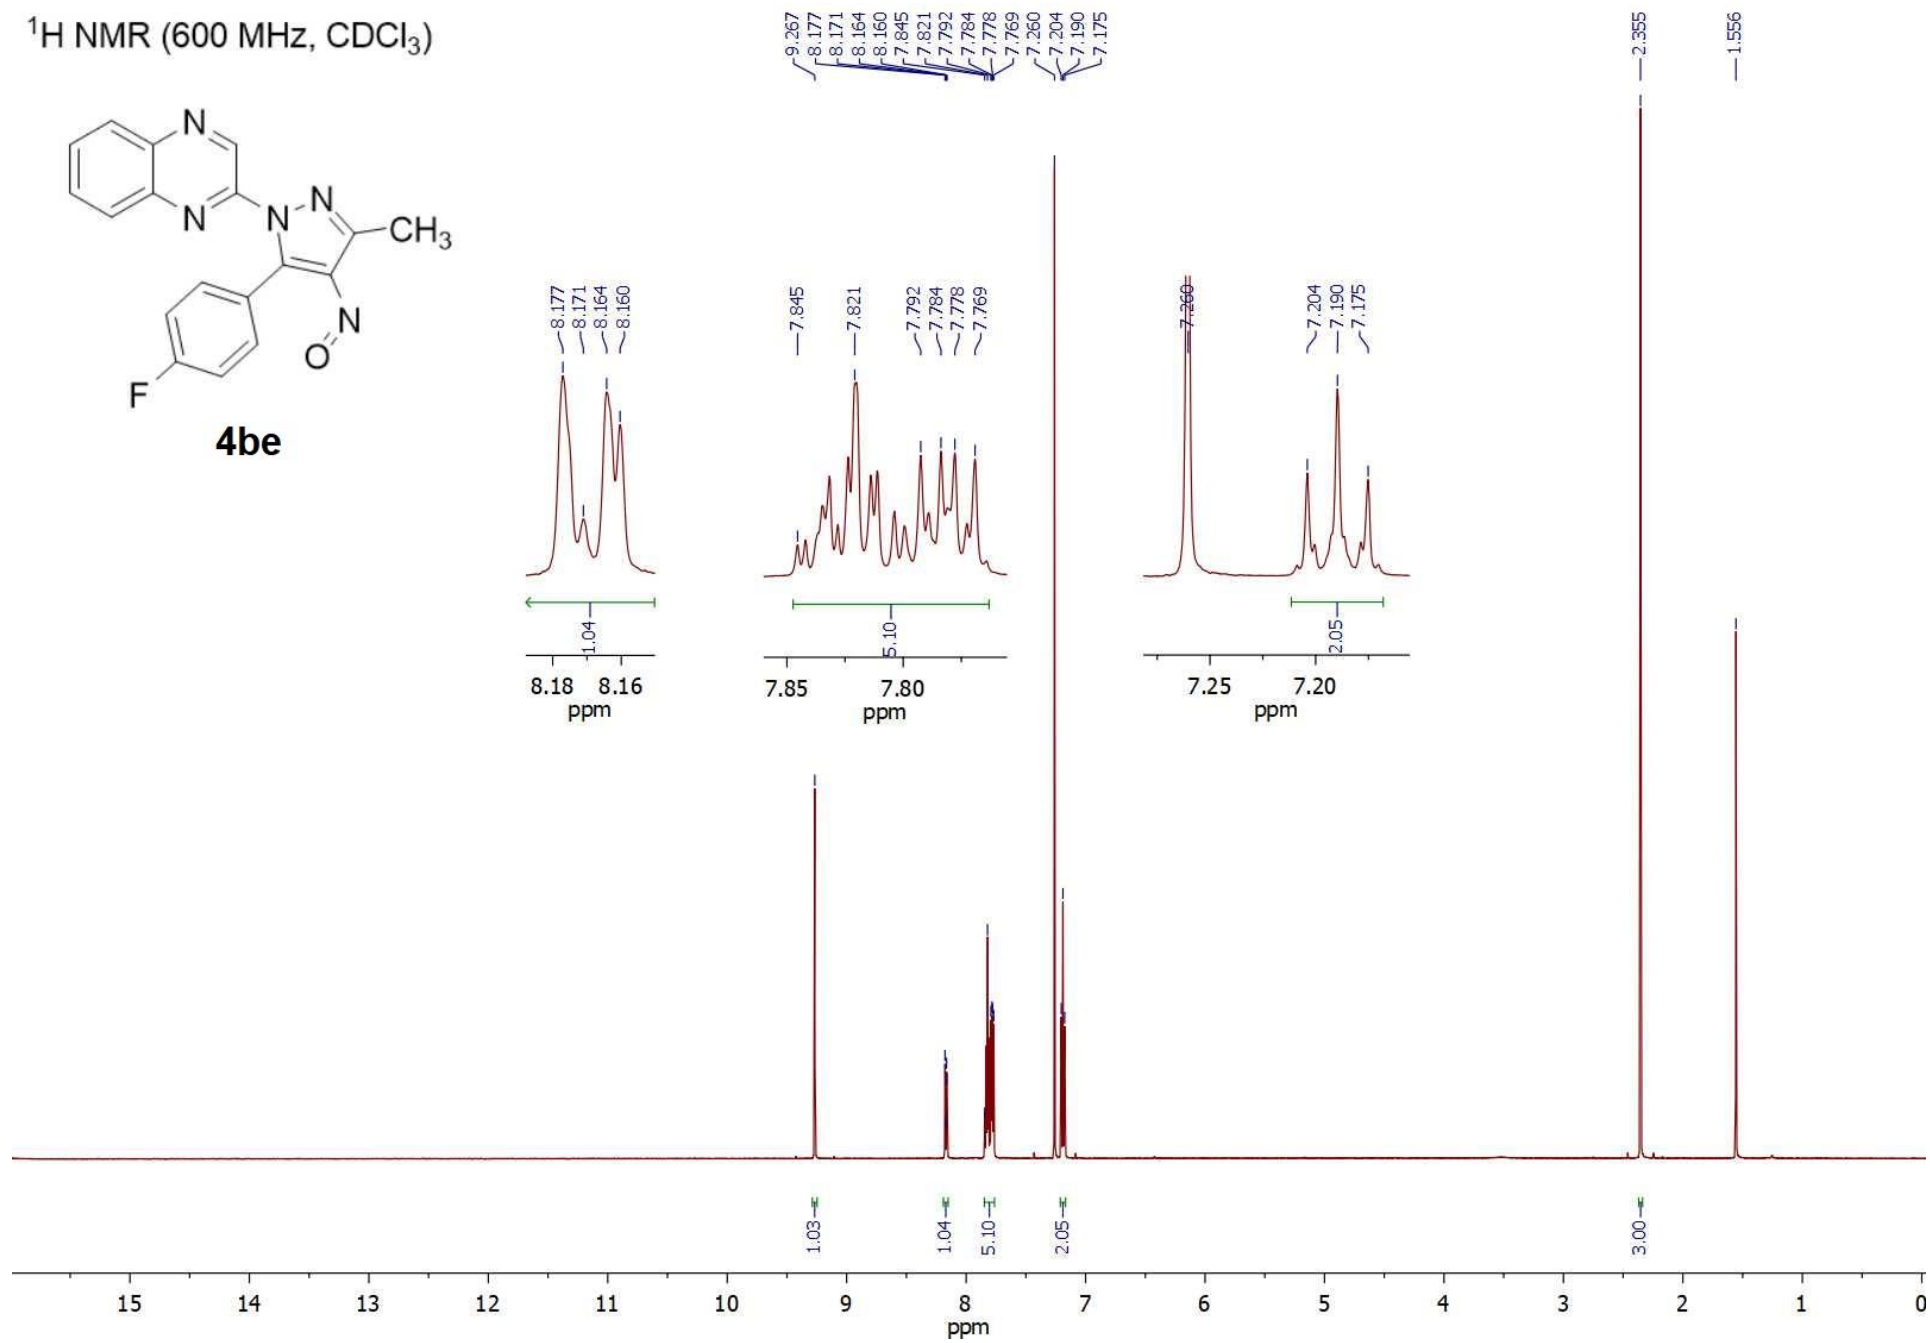

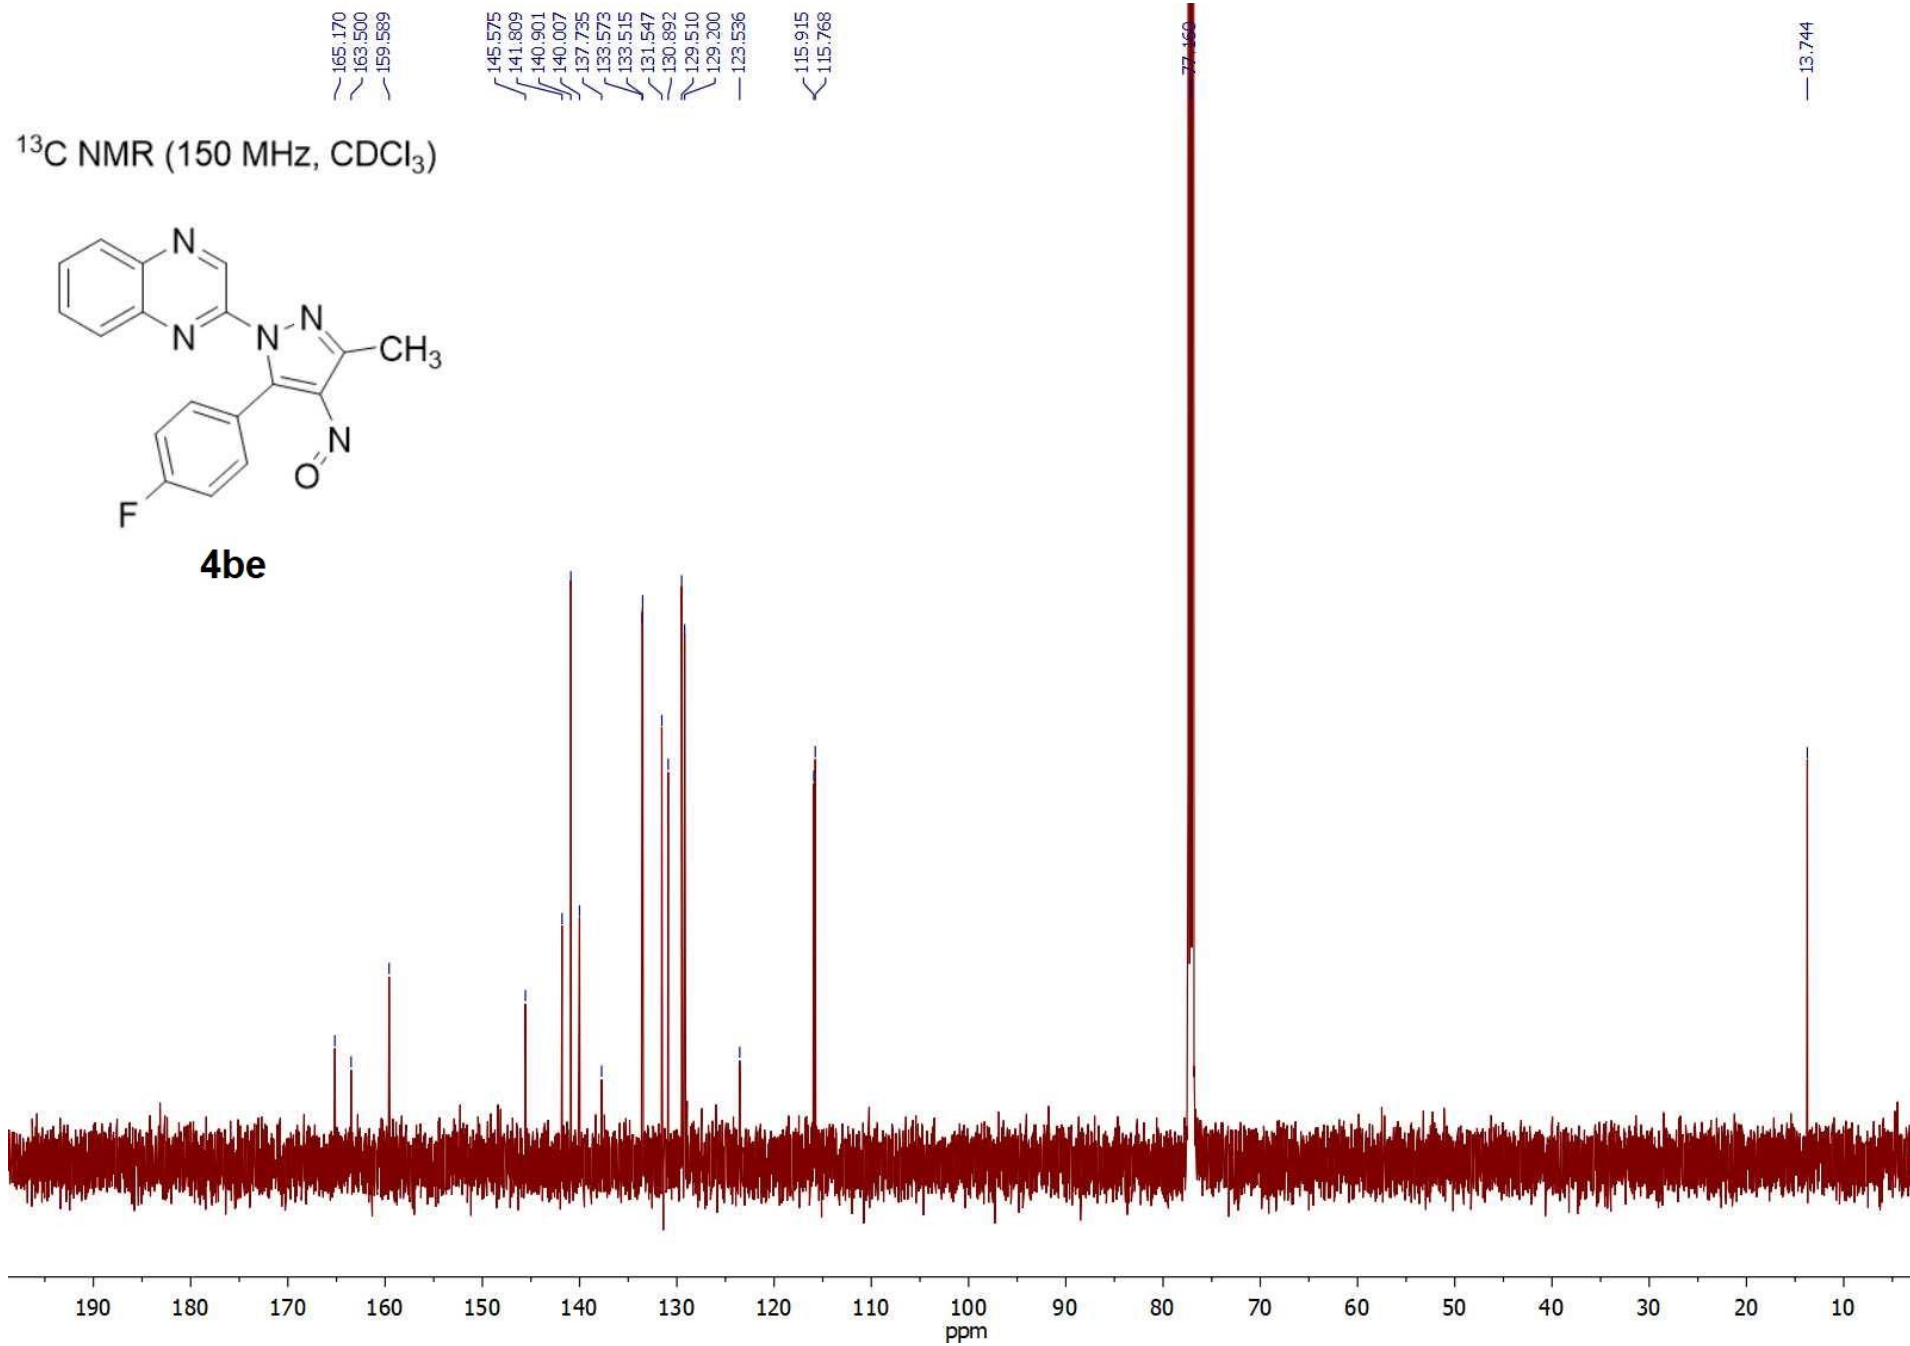

$^{19}\text{F}$  NMR (564 MHz,  $\text{CDCl}_3$ )

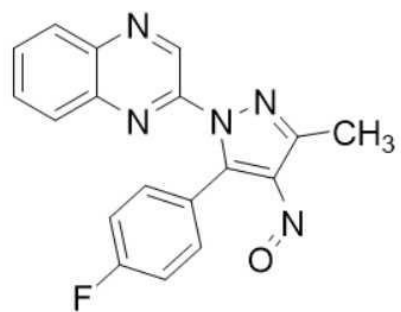

**4be**

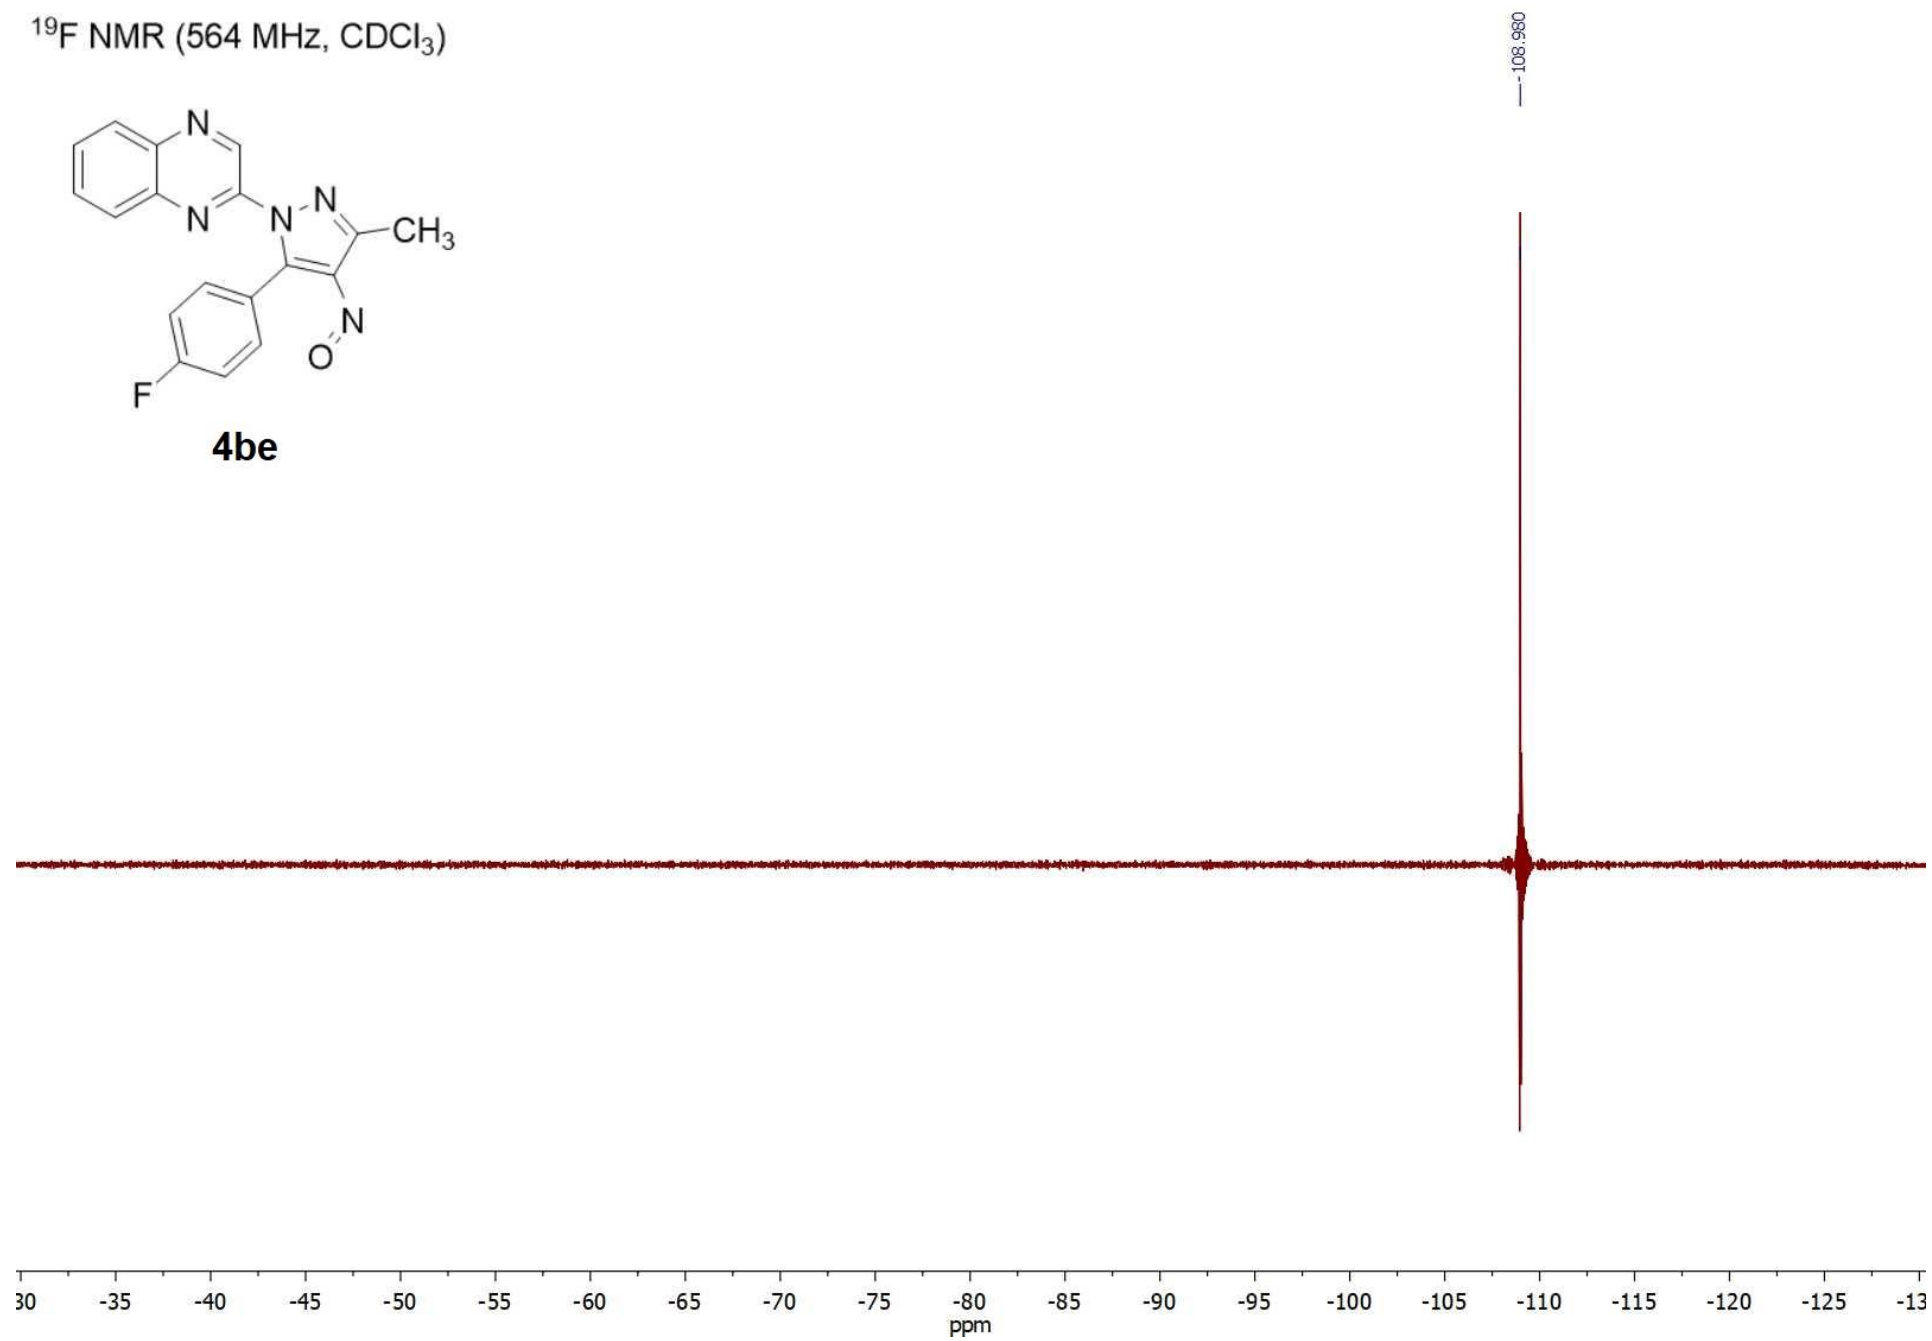

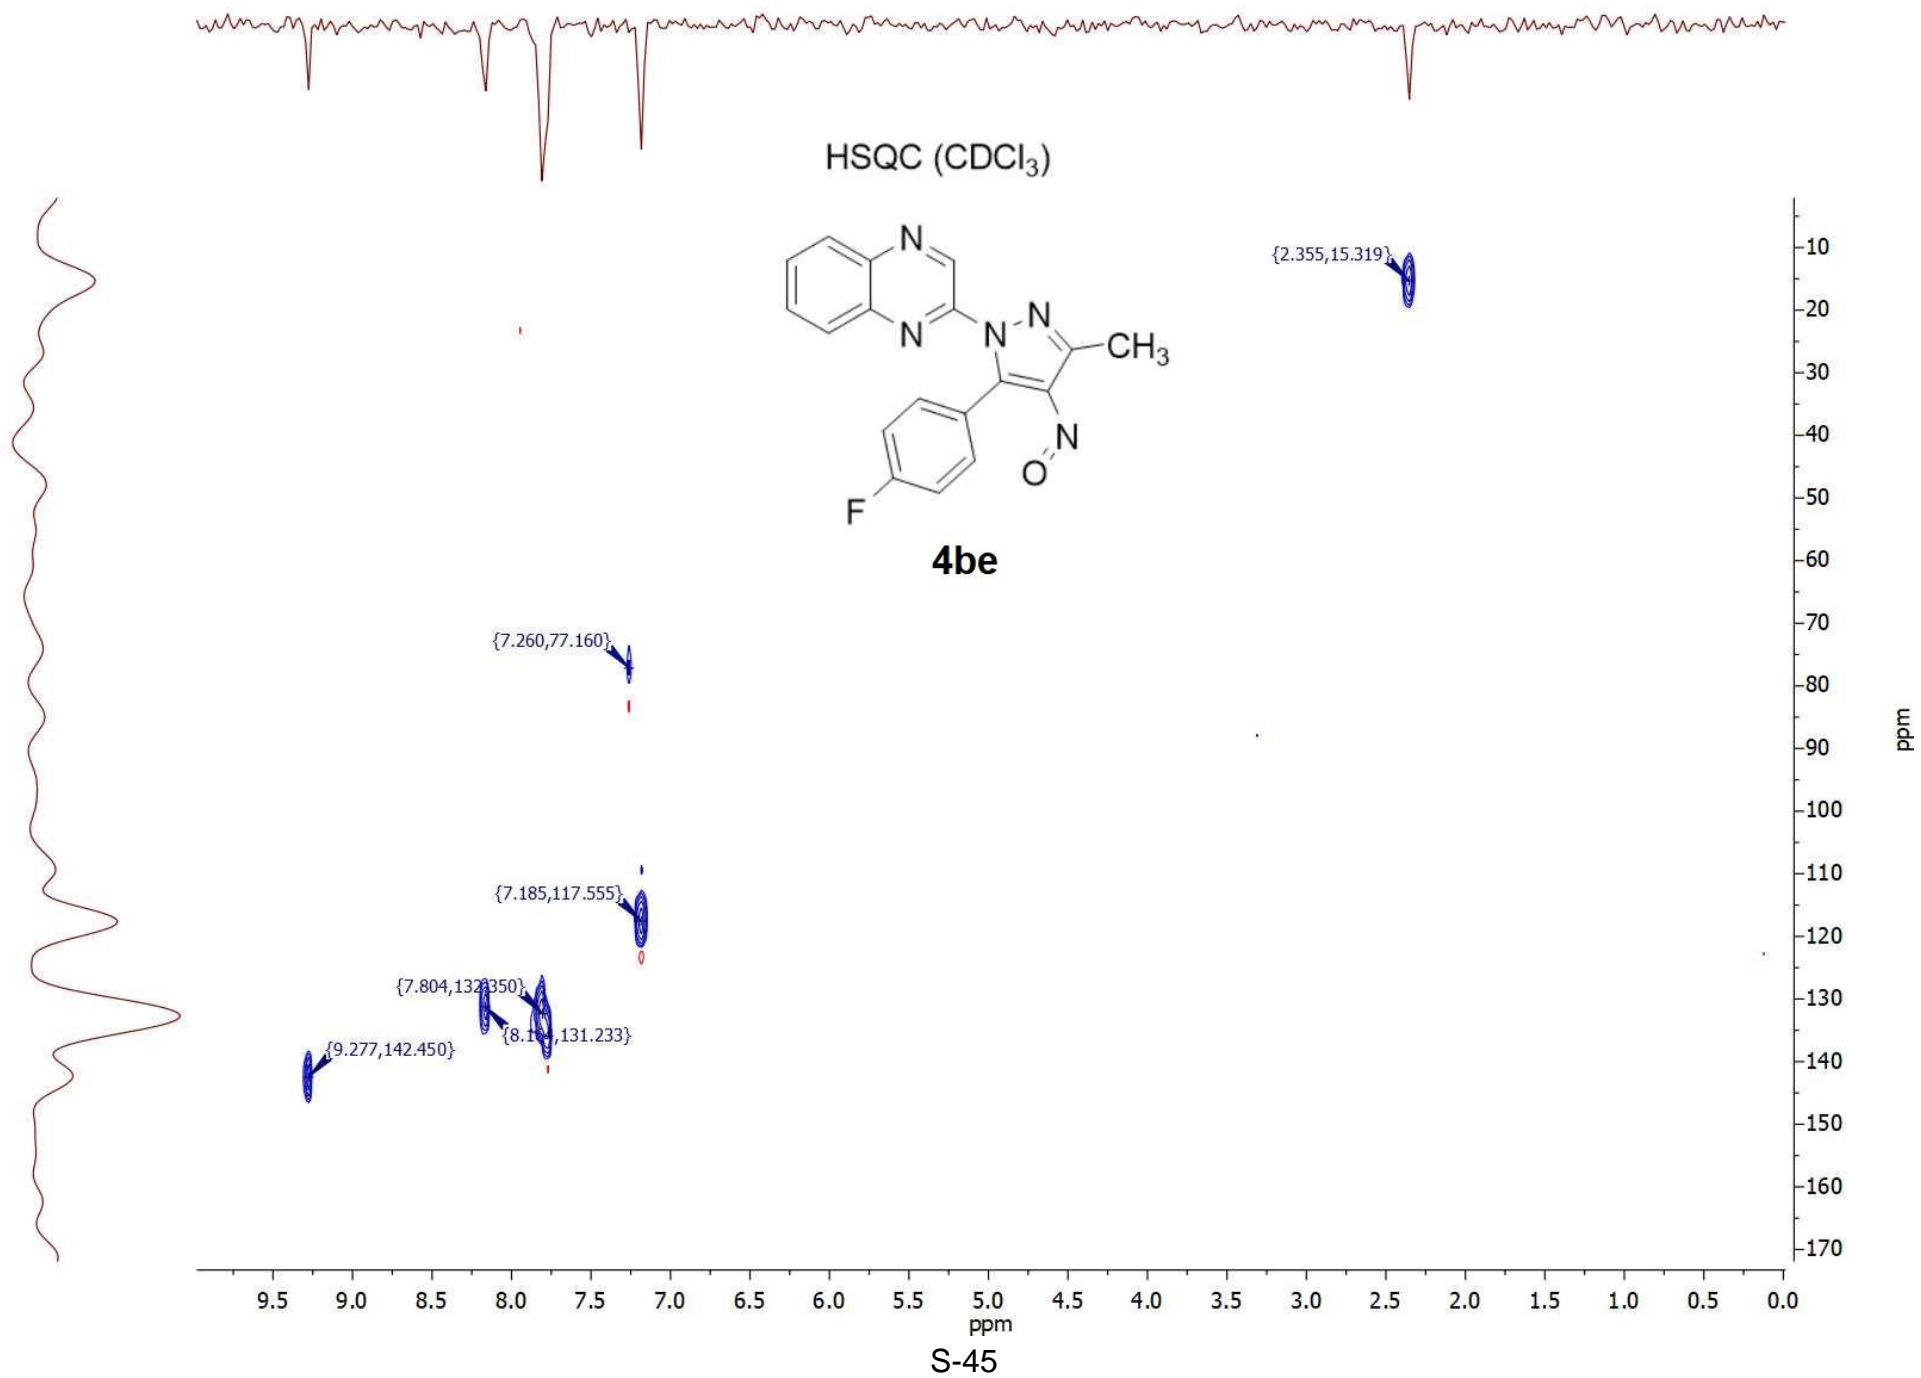

9.034  
8.159  
8.156  
8.143  
7.973  
7.961  
7.957  
7.848  
7.845  
7.836  
7.833  
7.829  
7.824  
7.820  
7.816  
7.813  
7.804  
7.801  
7.651  
7.637  
7.283  
7.270  
7.260

2.430  
2.353

1.589

$^1\text{H}$  NMR (600 MHz,  $\text{CDCl}_3$ )

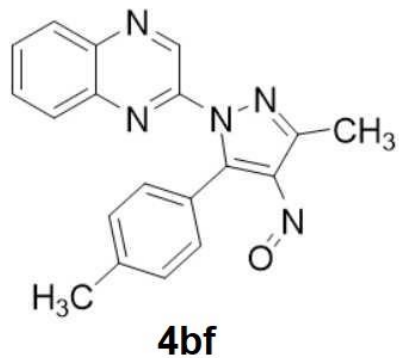

8.159  
8.156  
8.143

7.973  
7.961  
7.957

7.848  
7.845  
7.836  
7.833  
7.829  
7.824  
7.820  
7.816  
7.813  
7.804  
7.801

7.651  
7.637

7.283  
7.270  
7.260

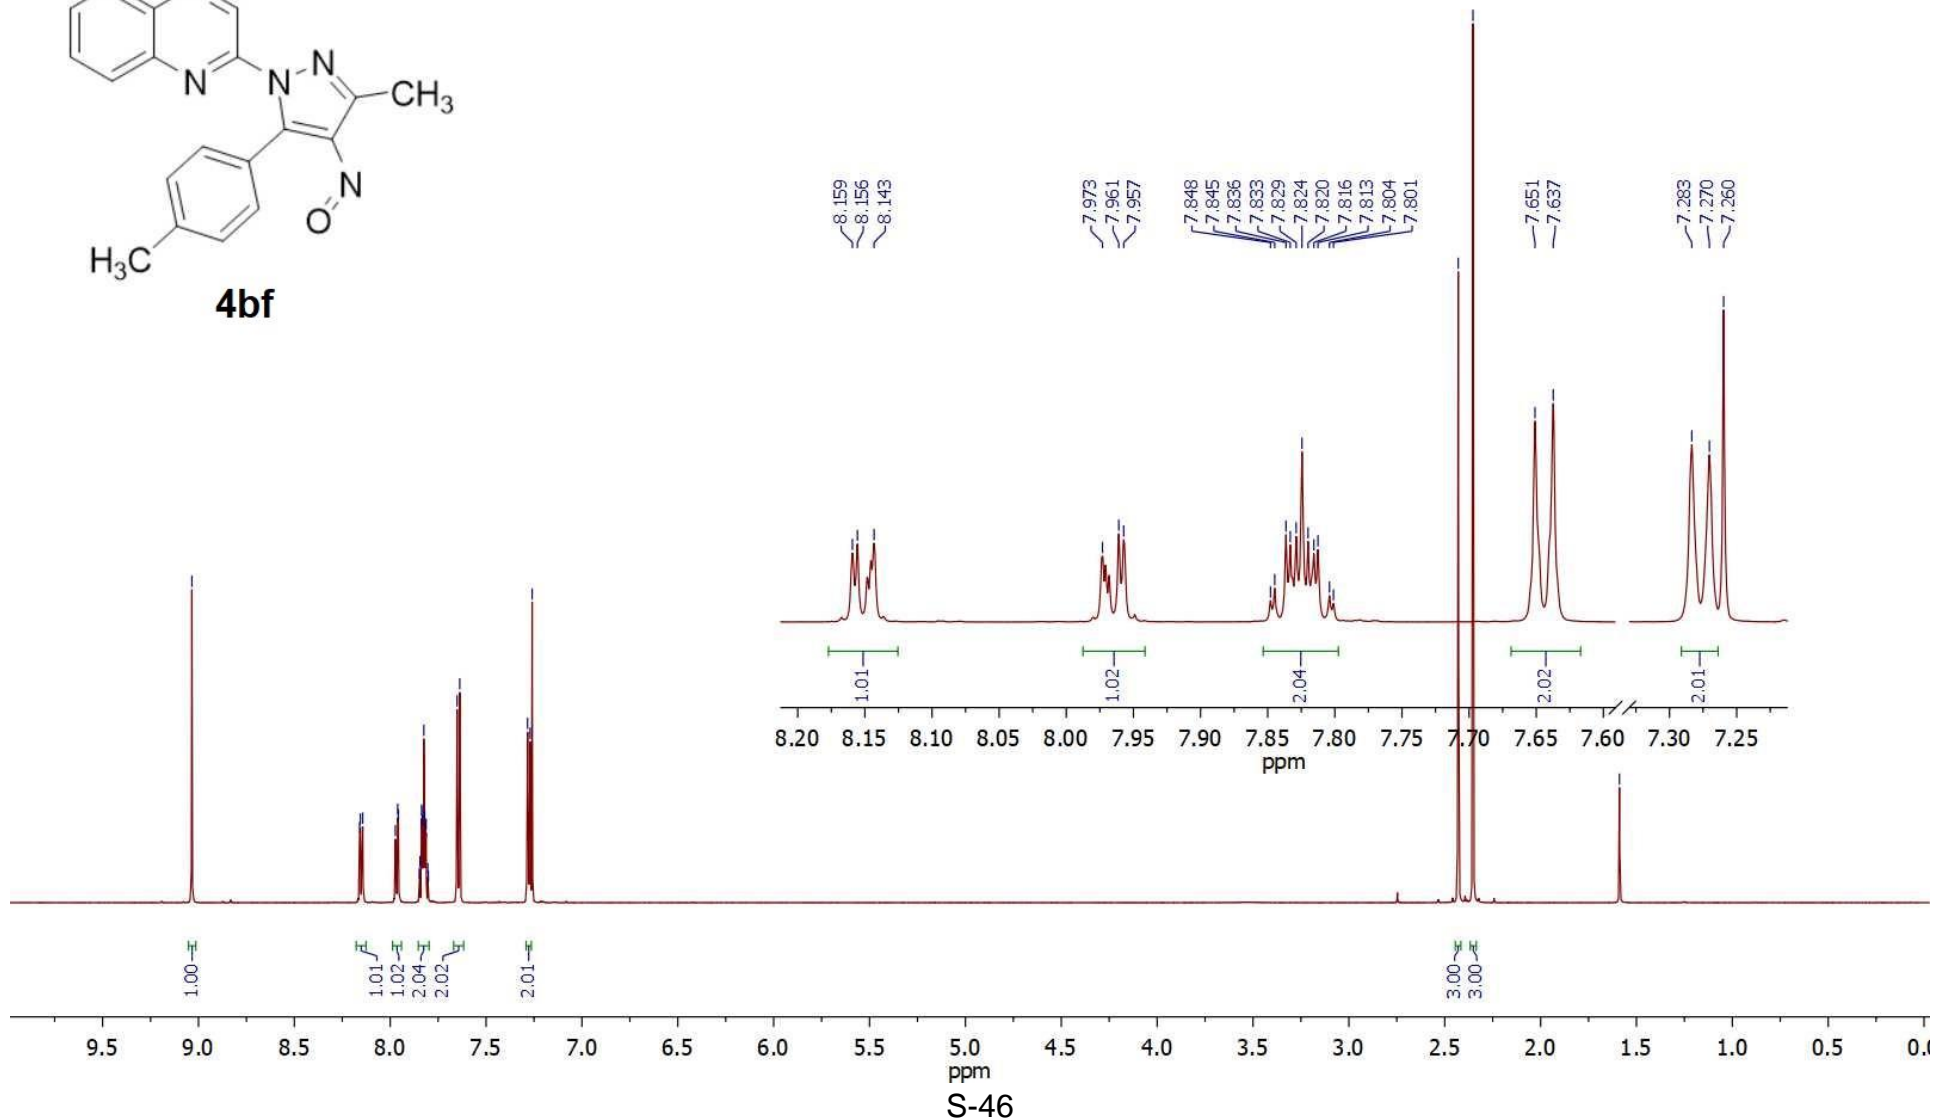

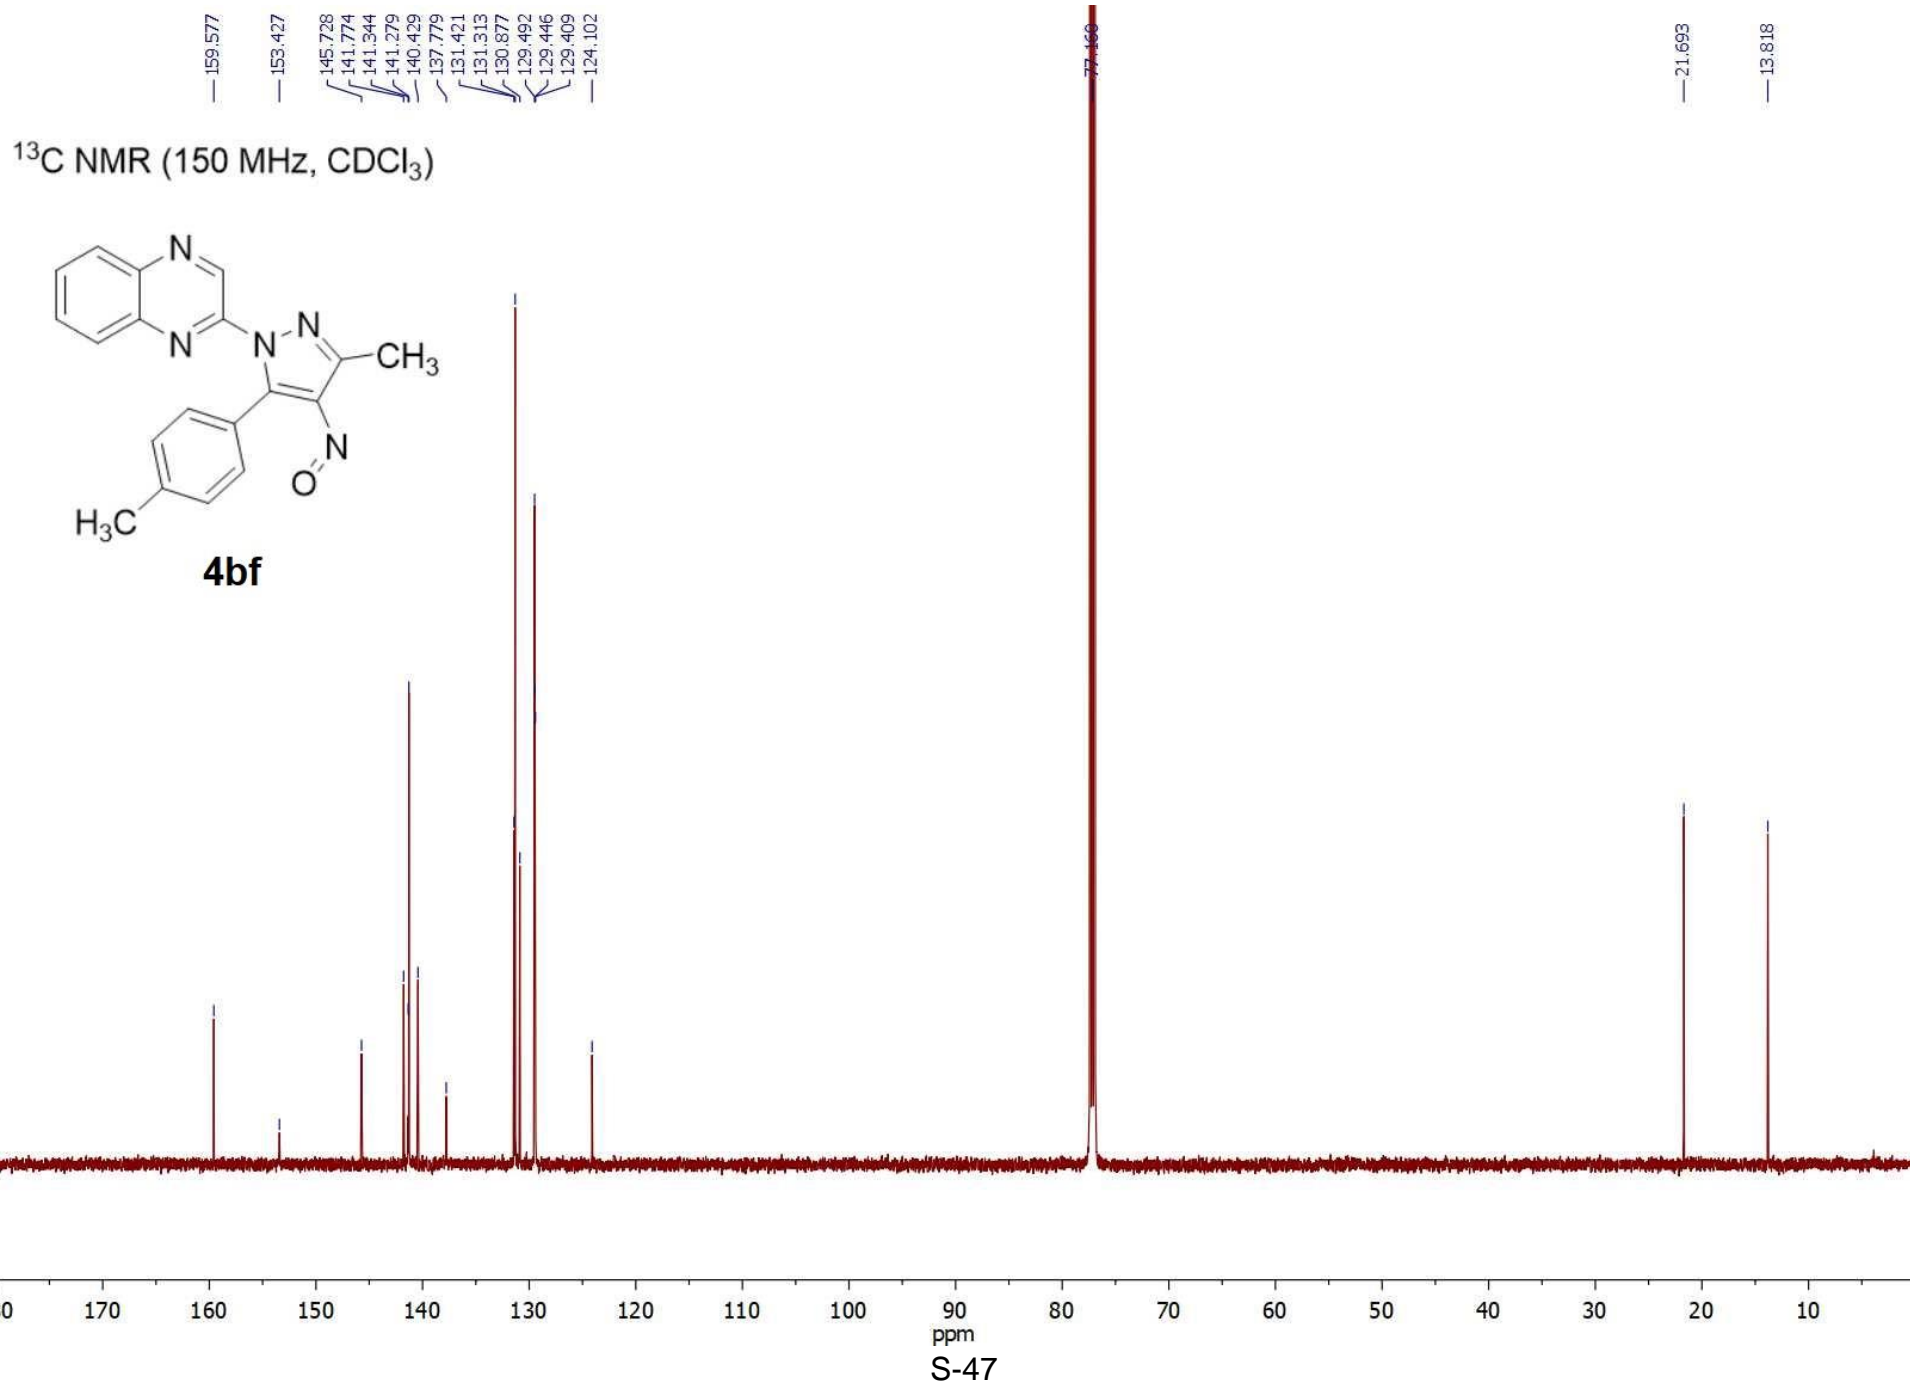

COSY (CDCl<sub>3</sub>)

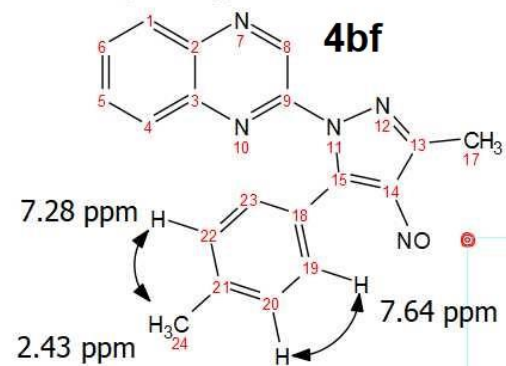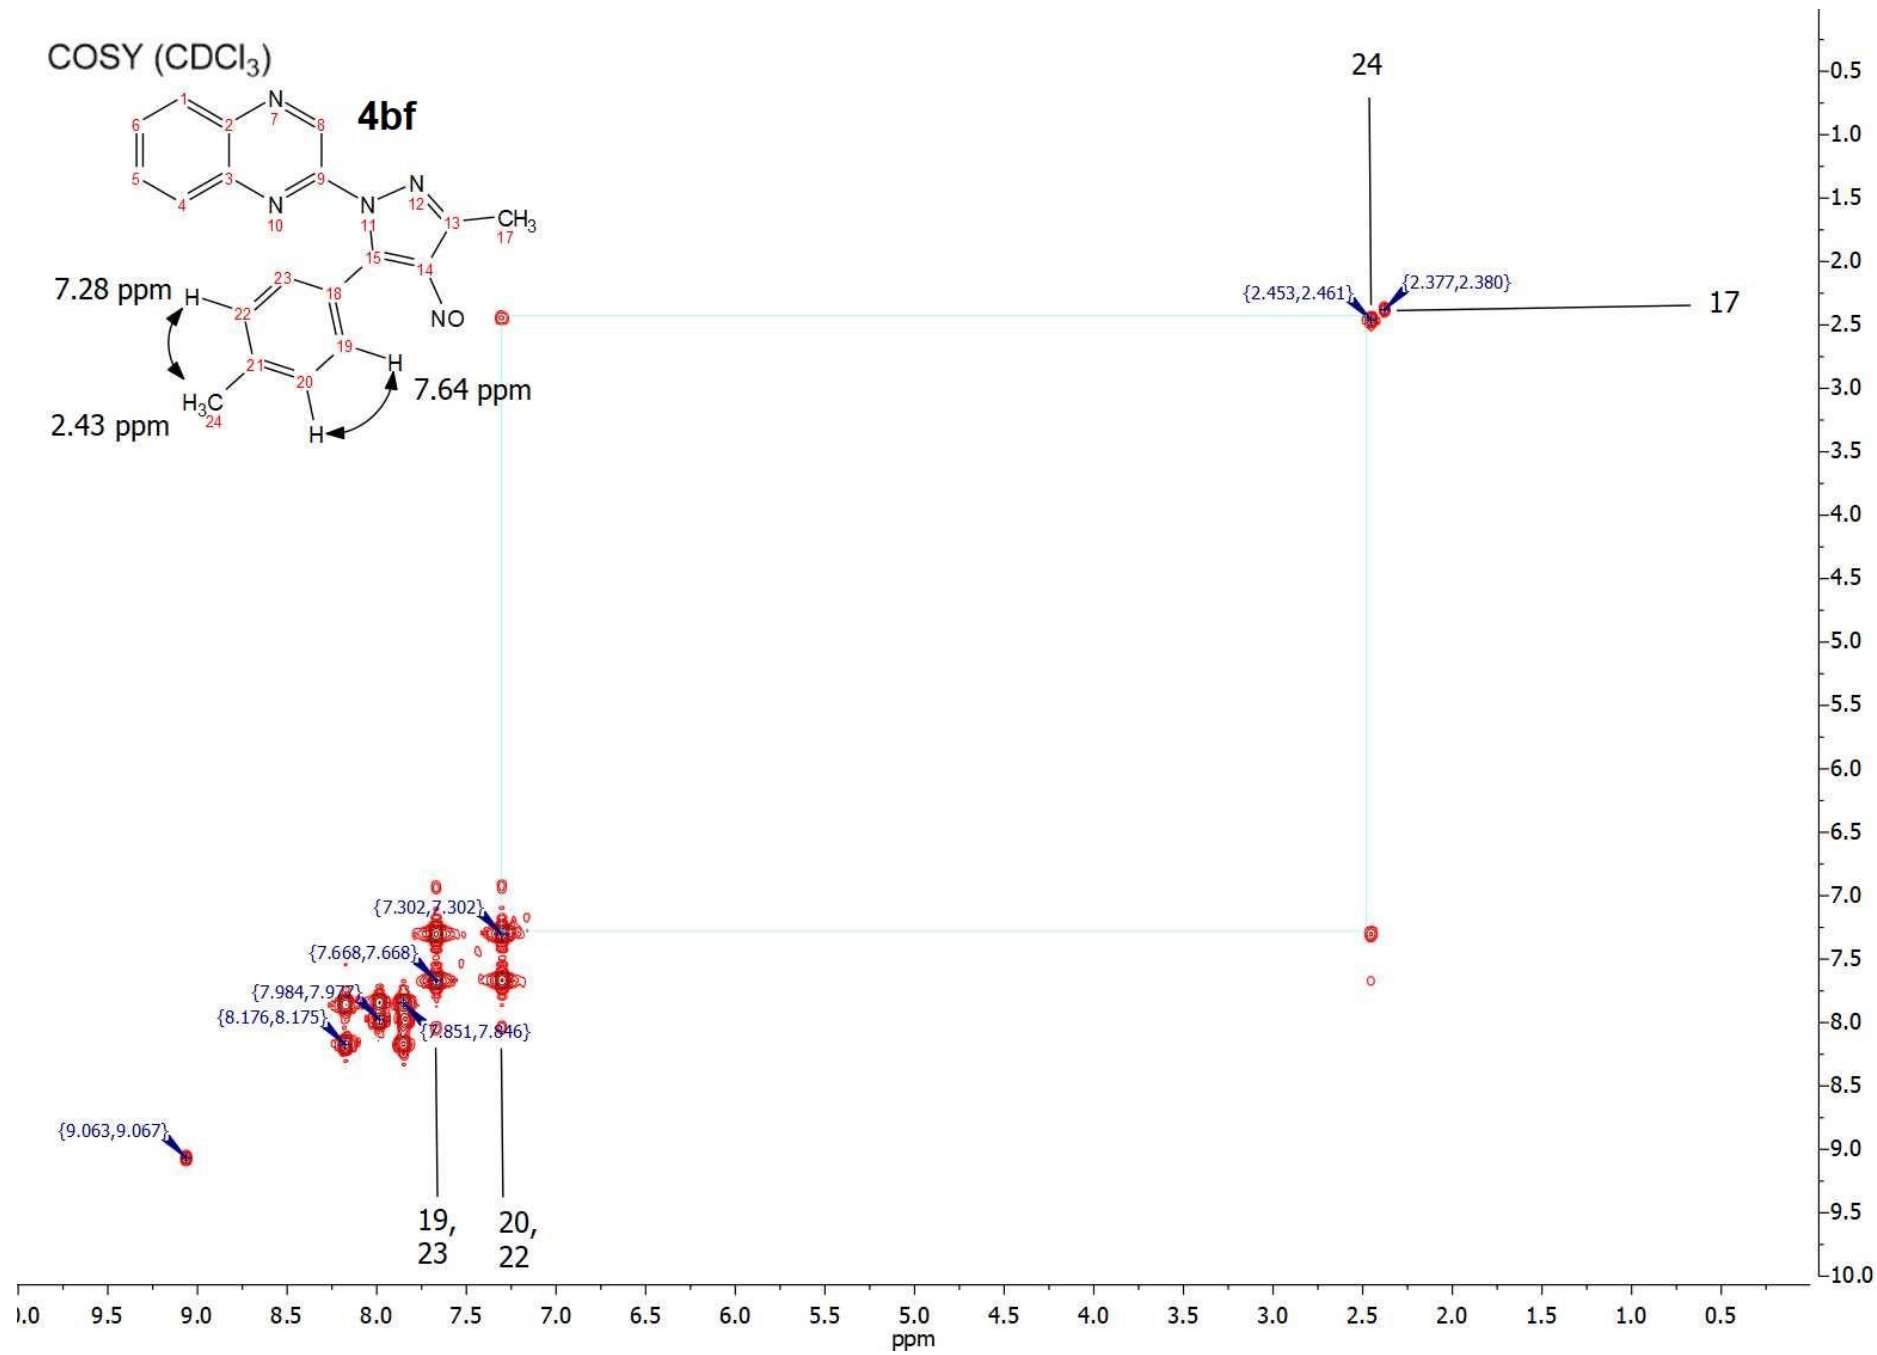



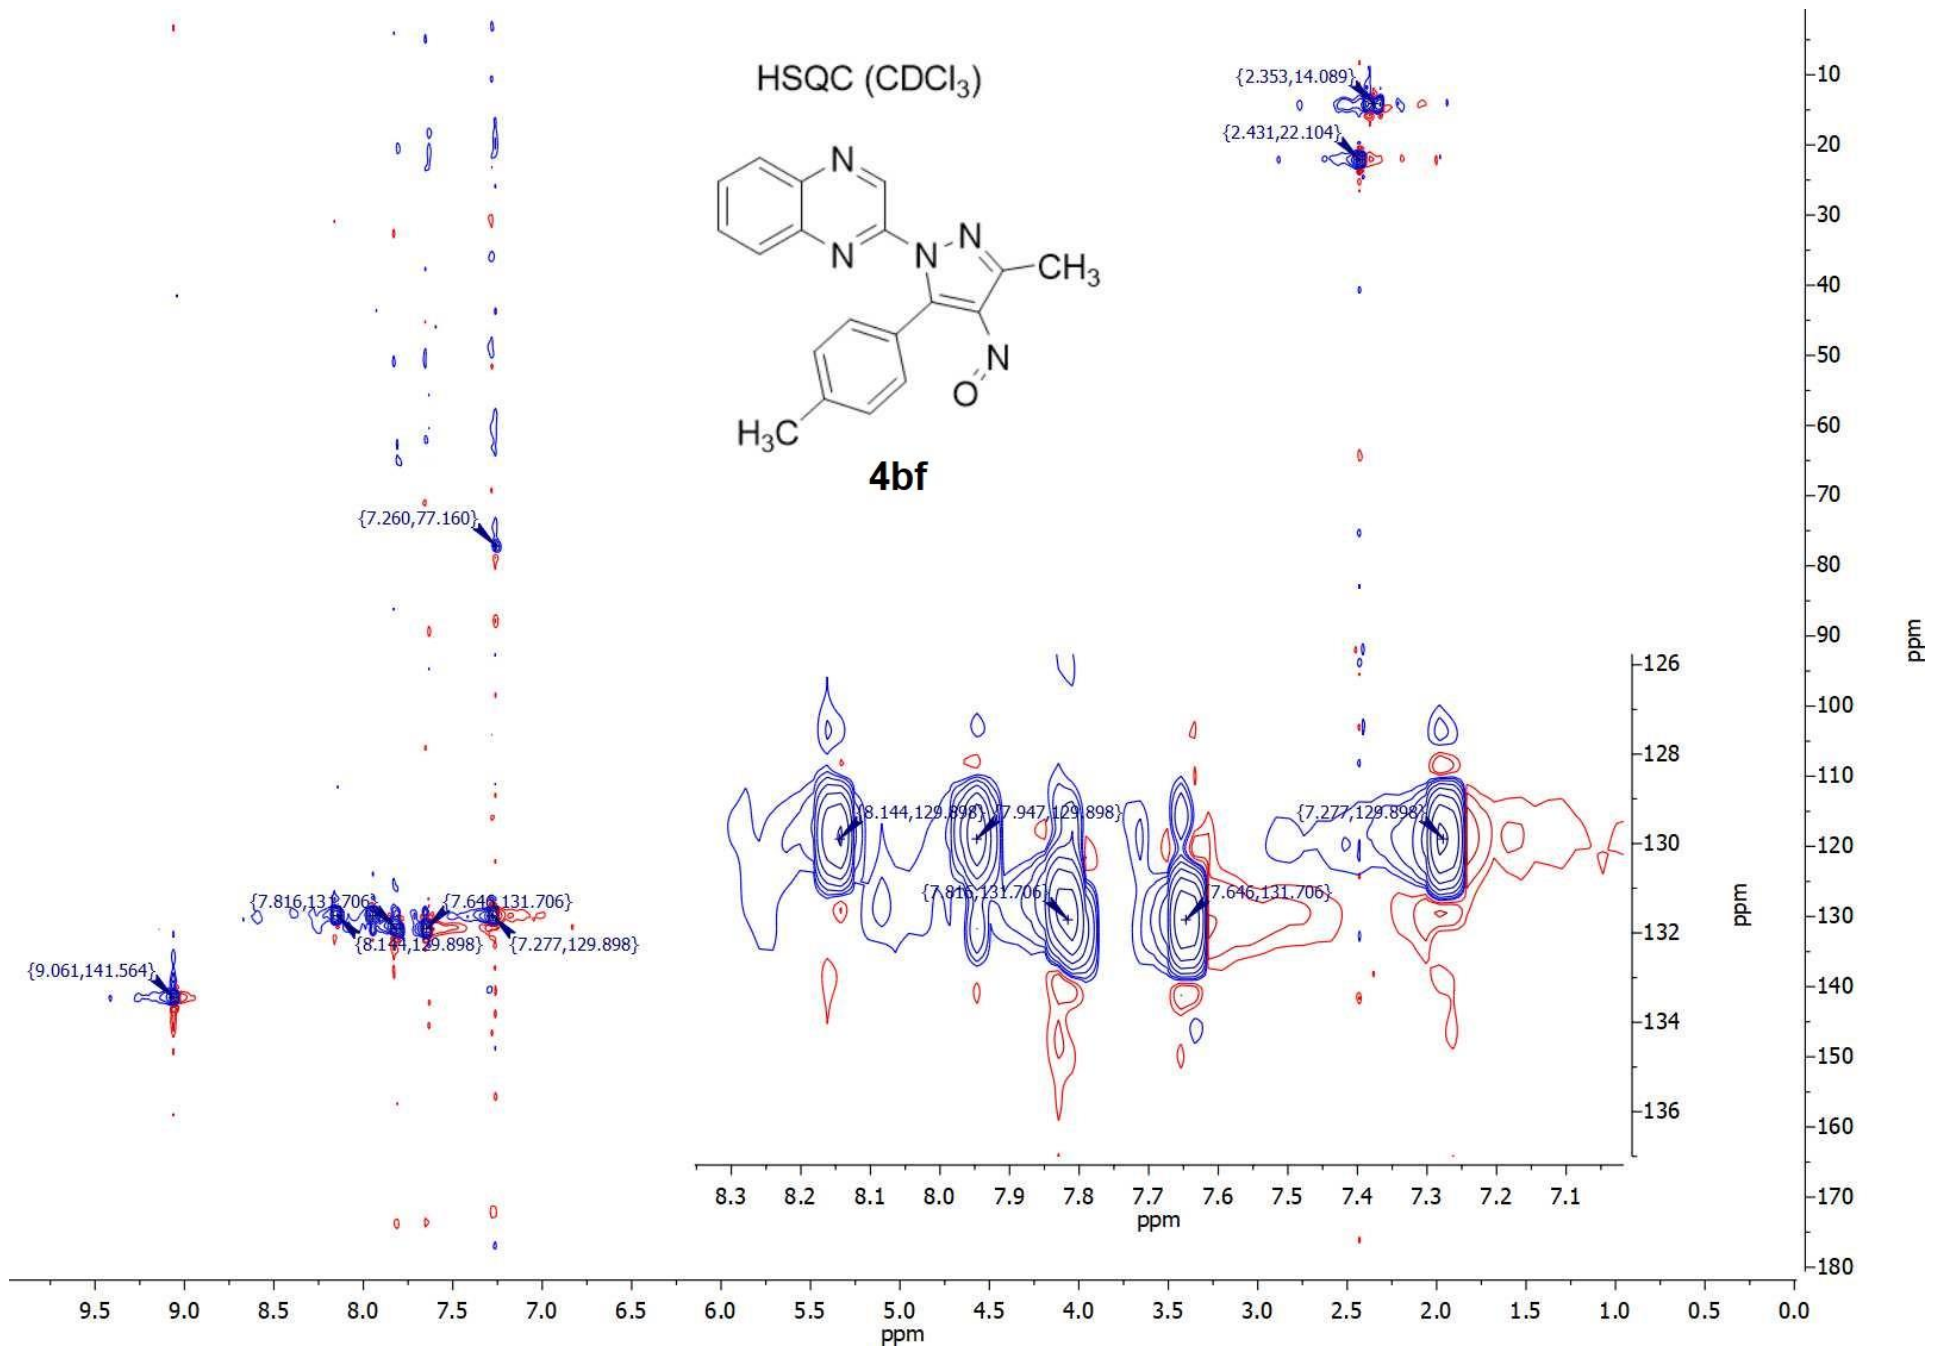

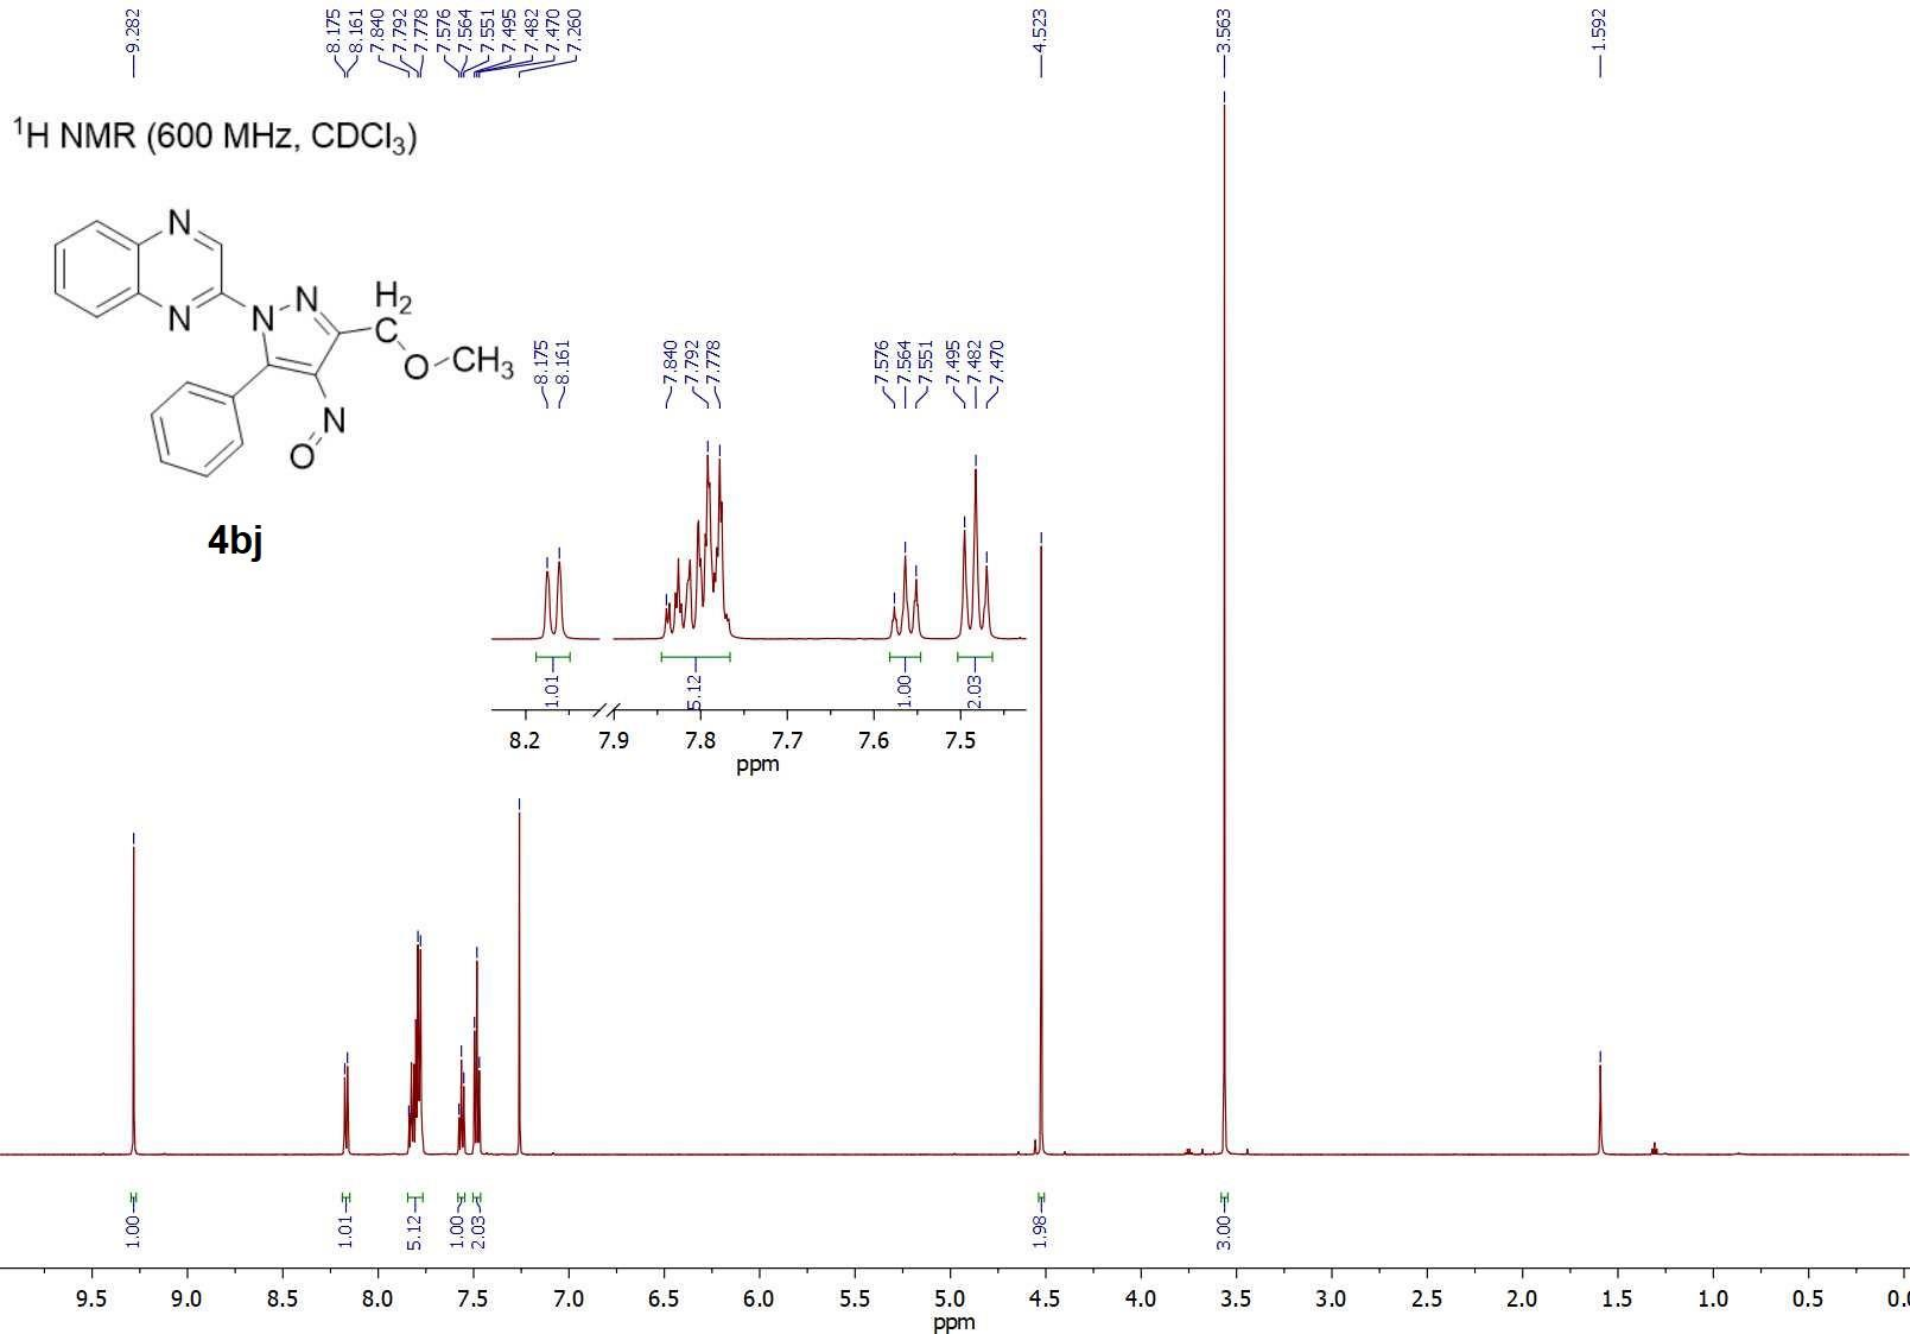

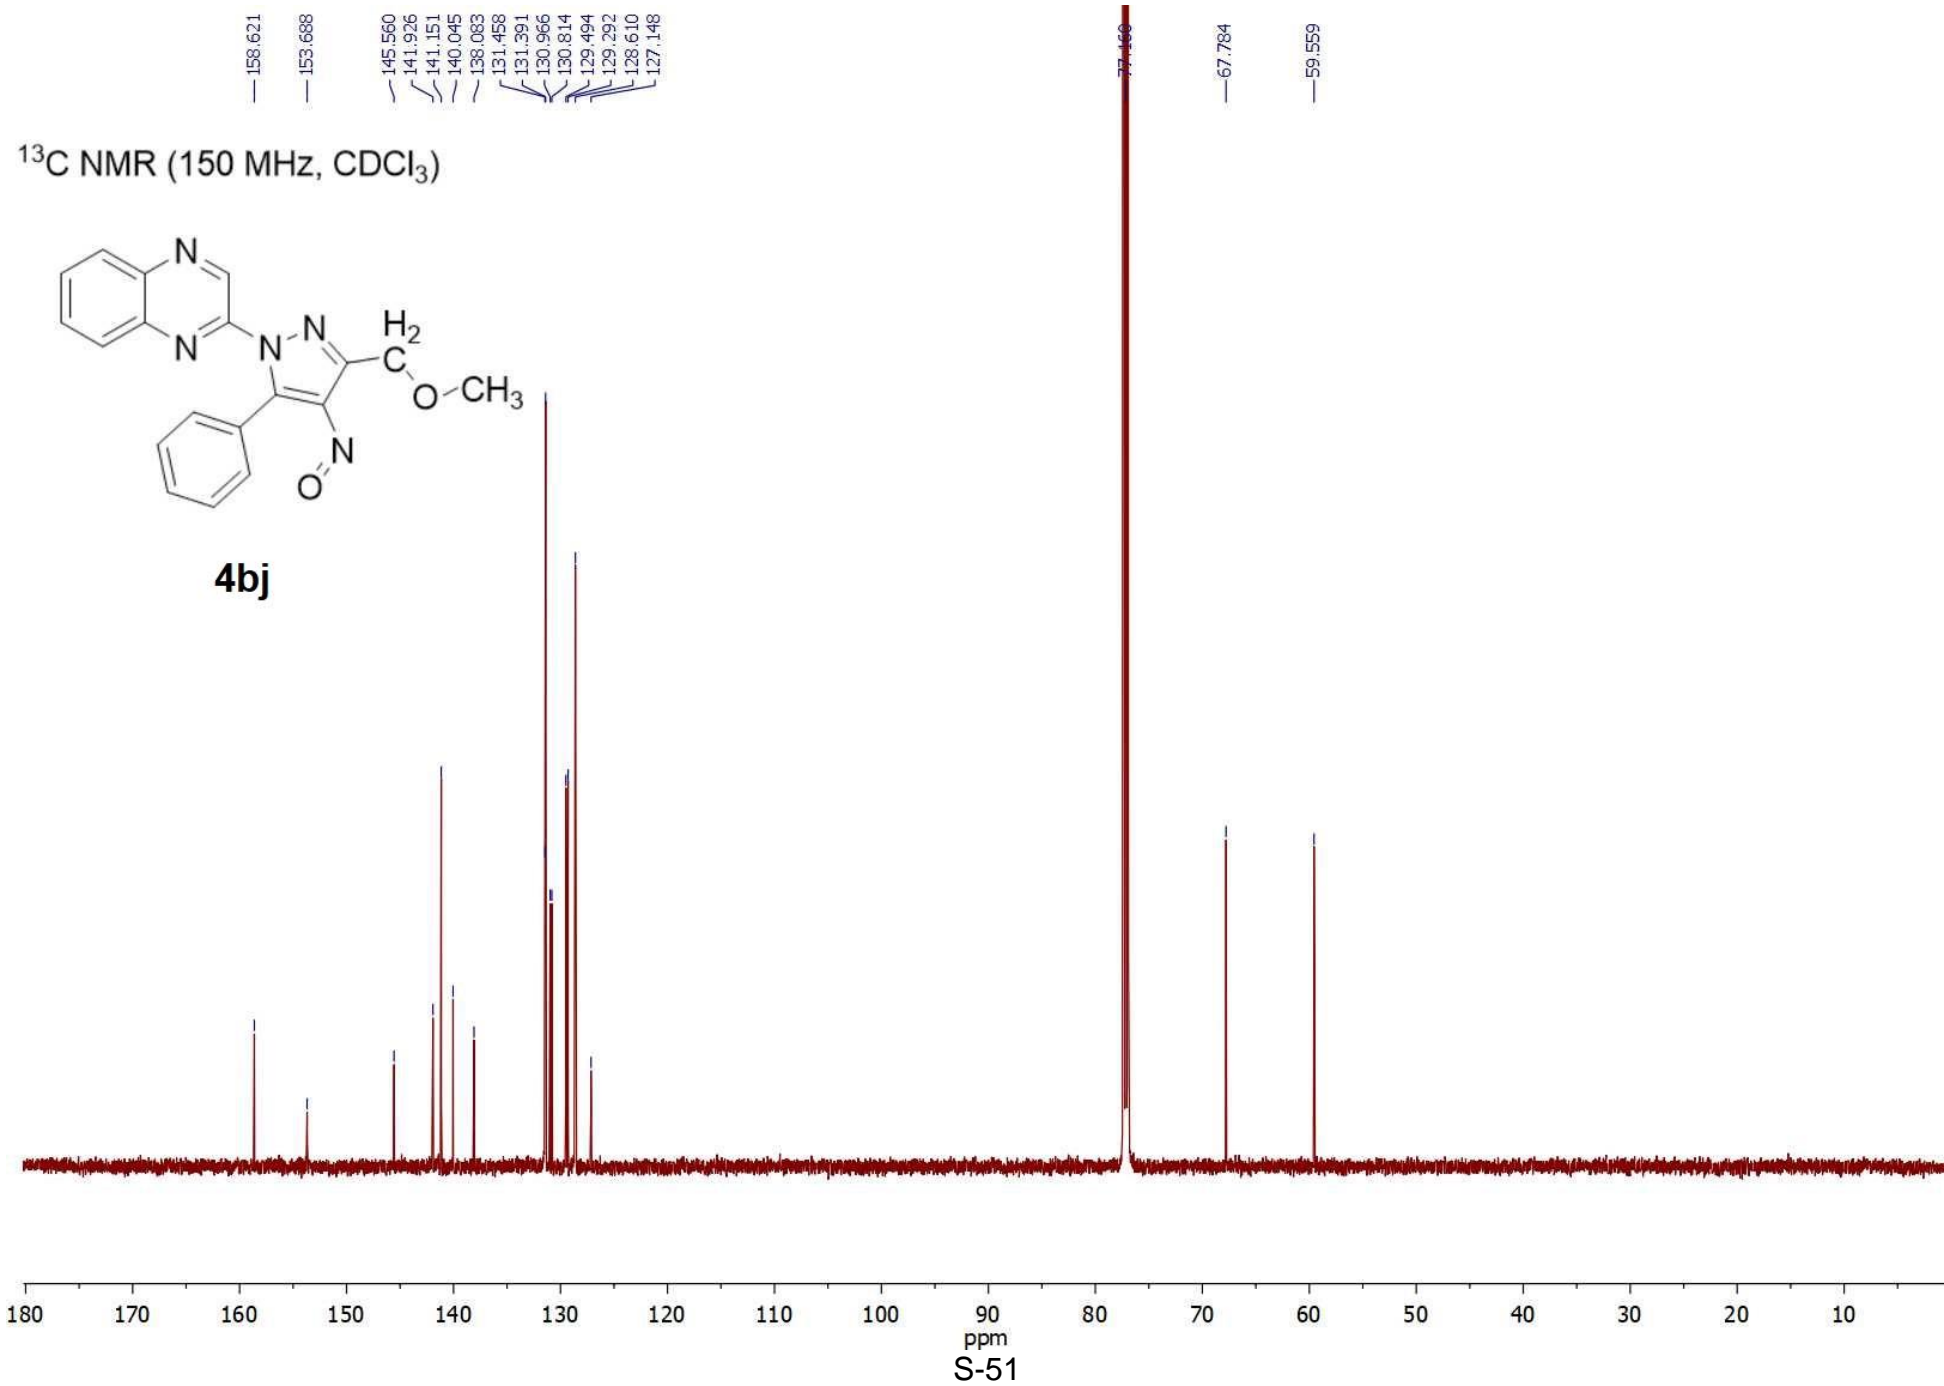

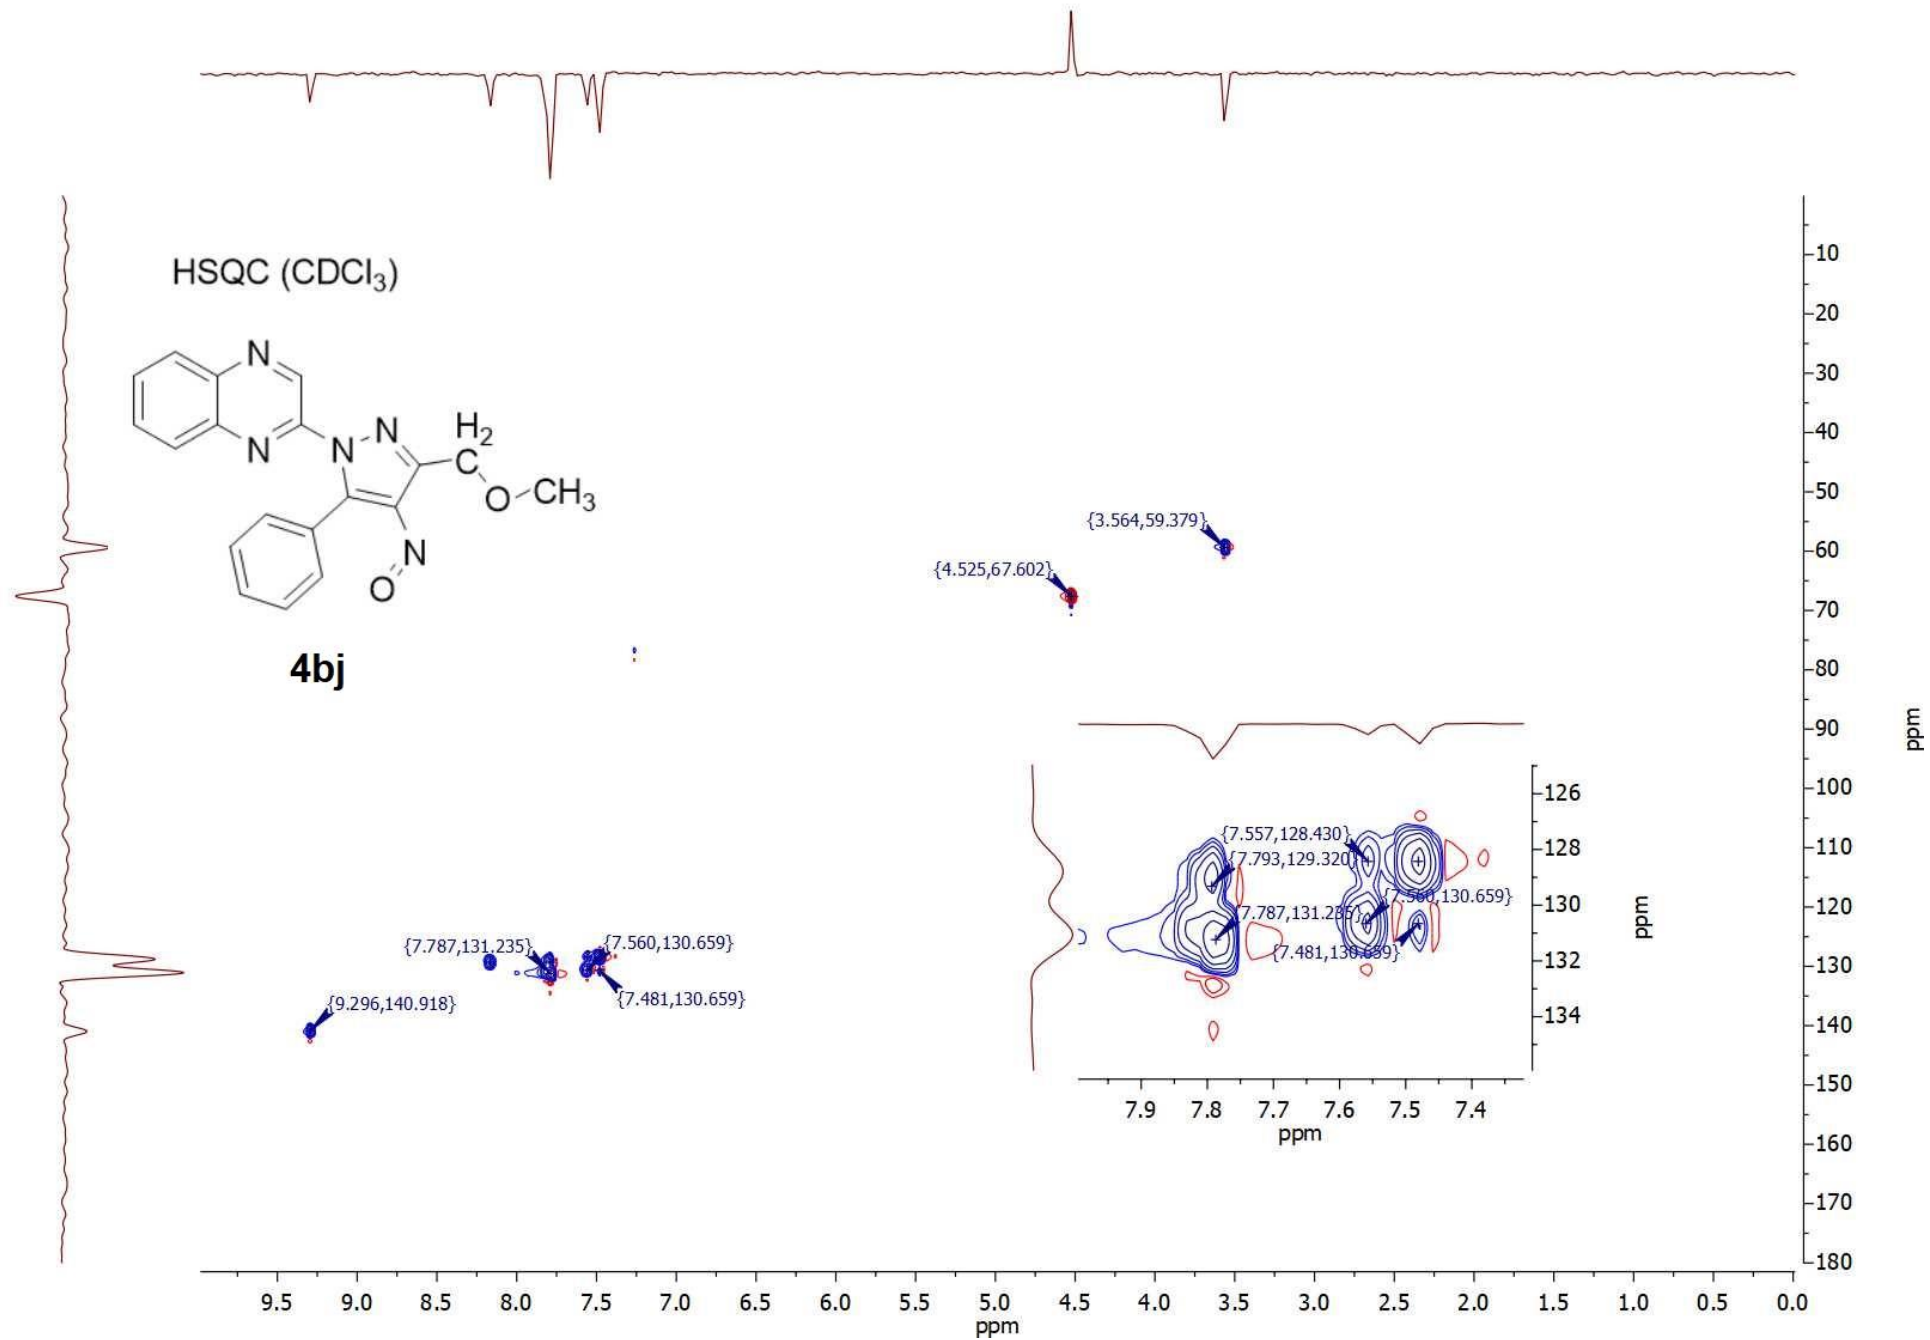

<sup>1</sup>H NMR (600 MHz, CDCl<sub>3</sub>)

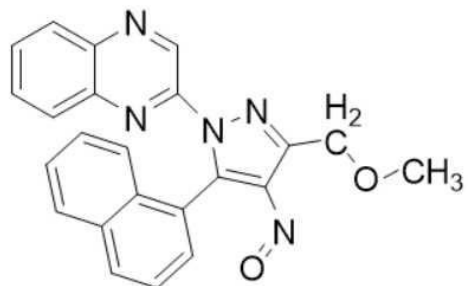

4bk

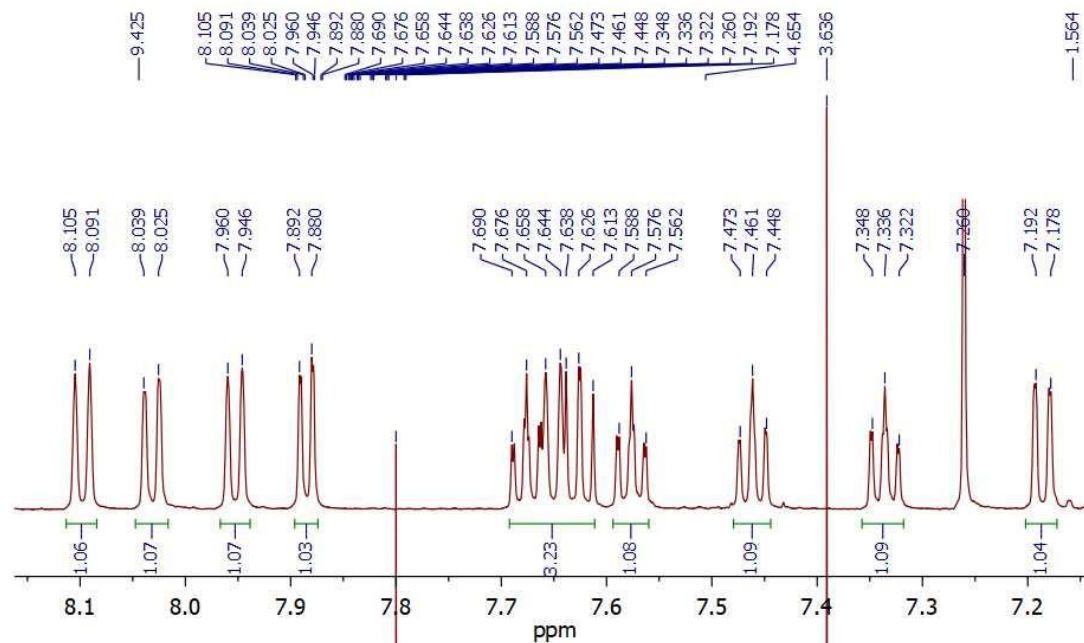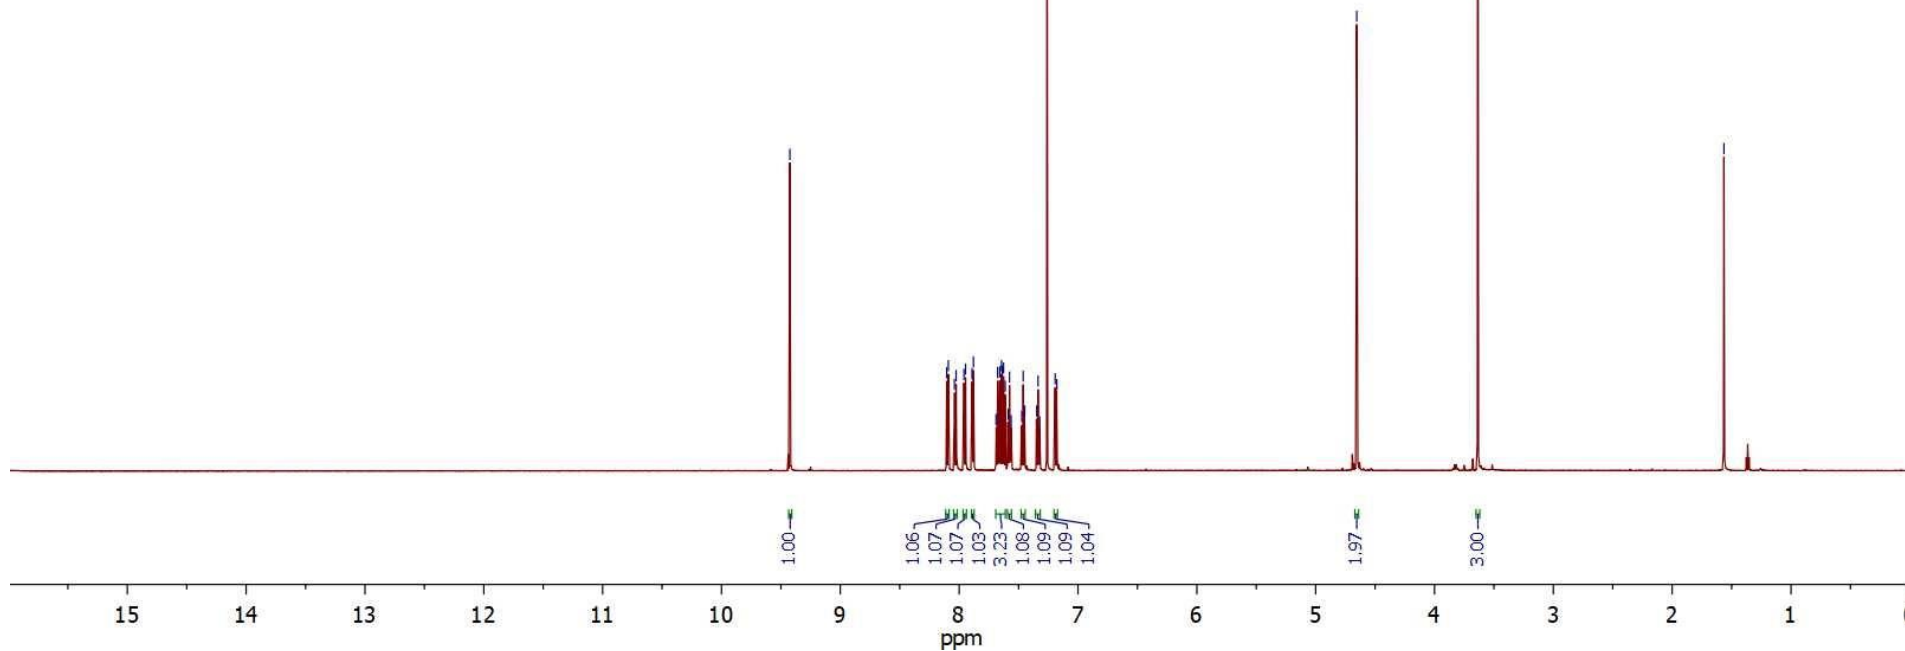

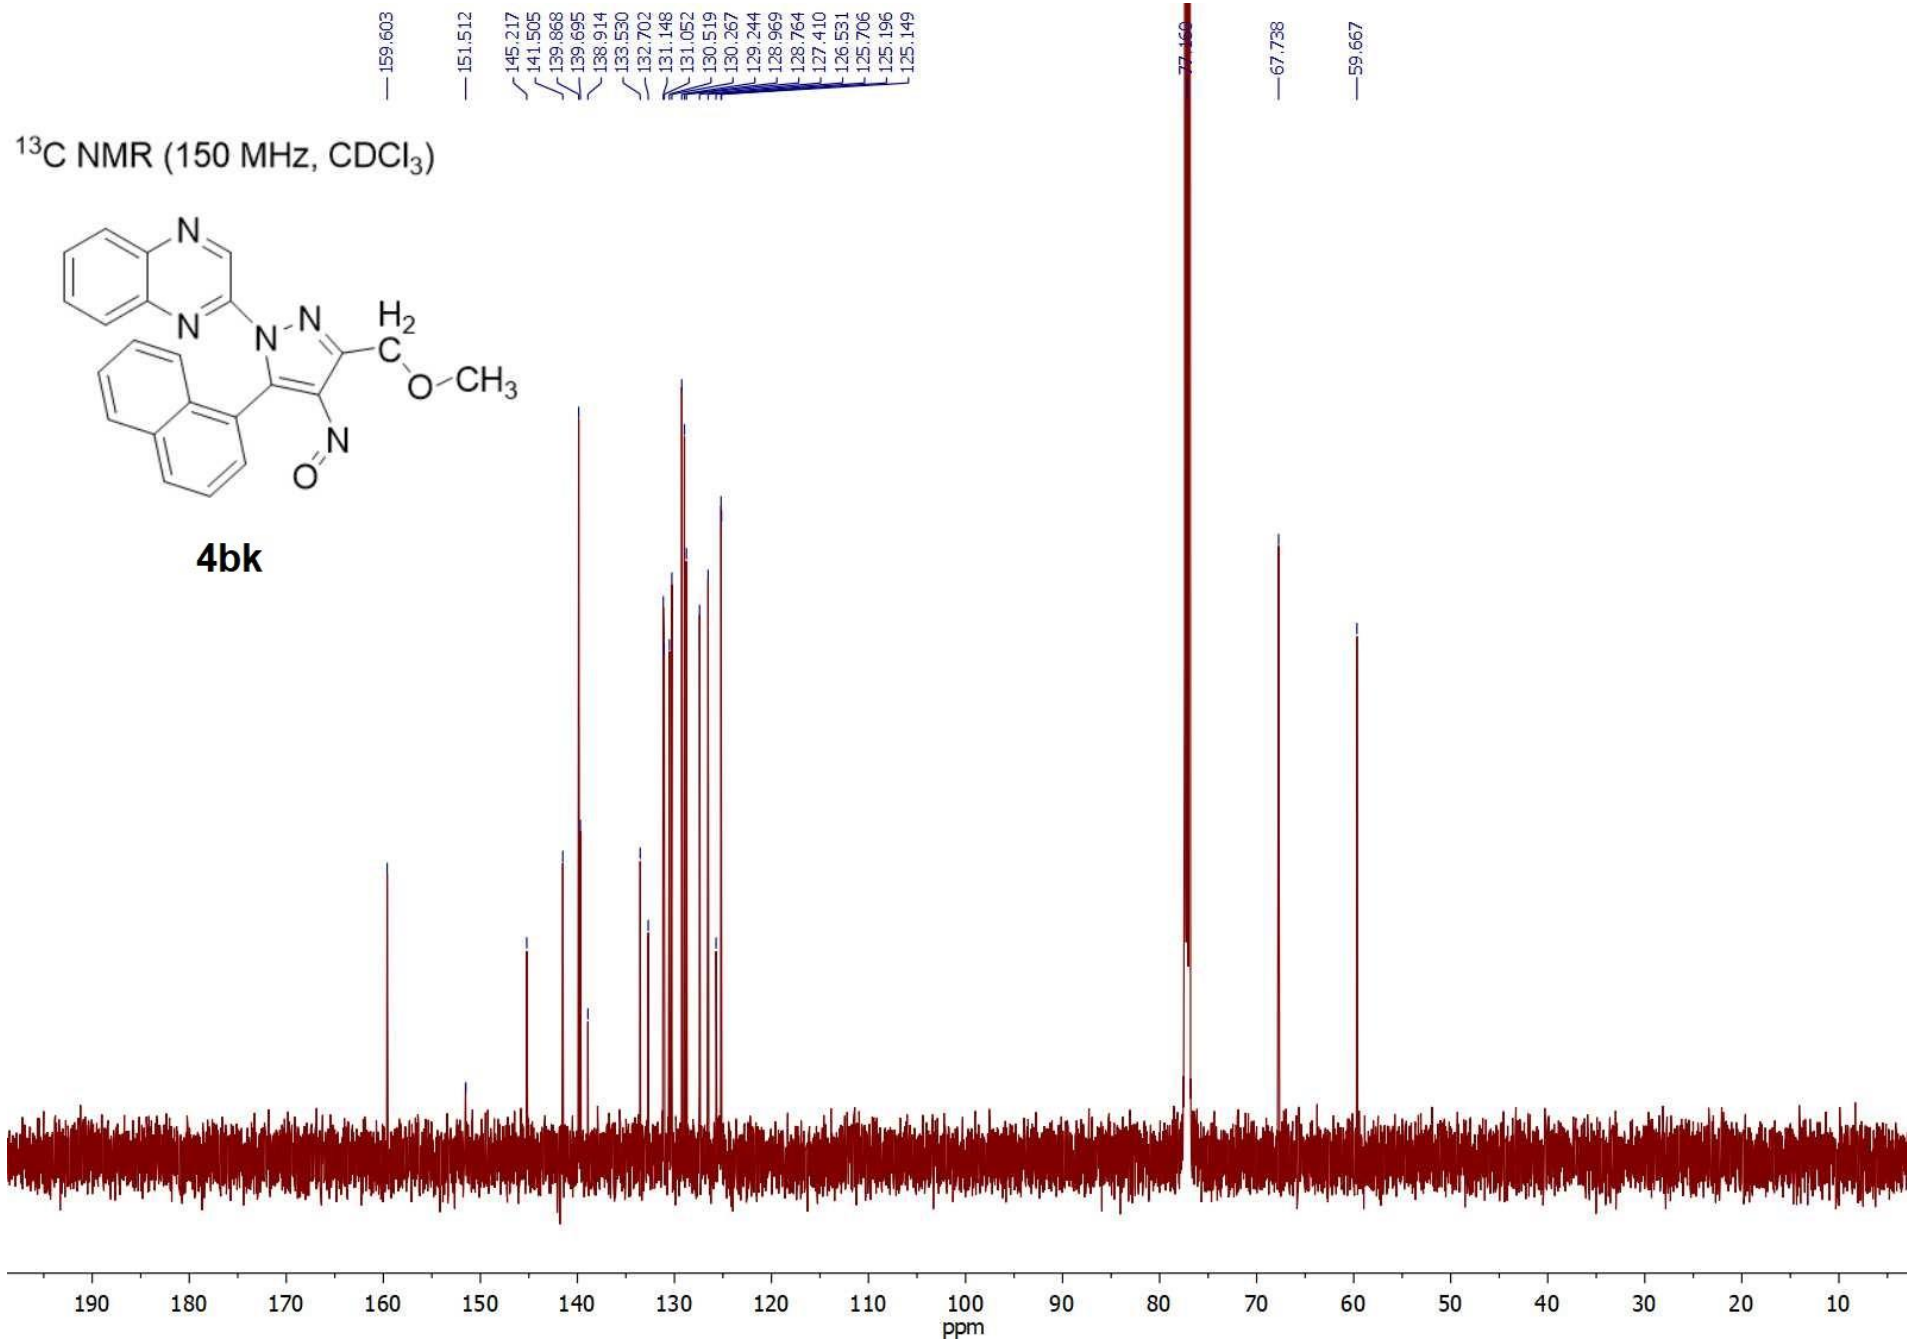

# HMBC (CDCl3)

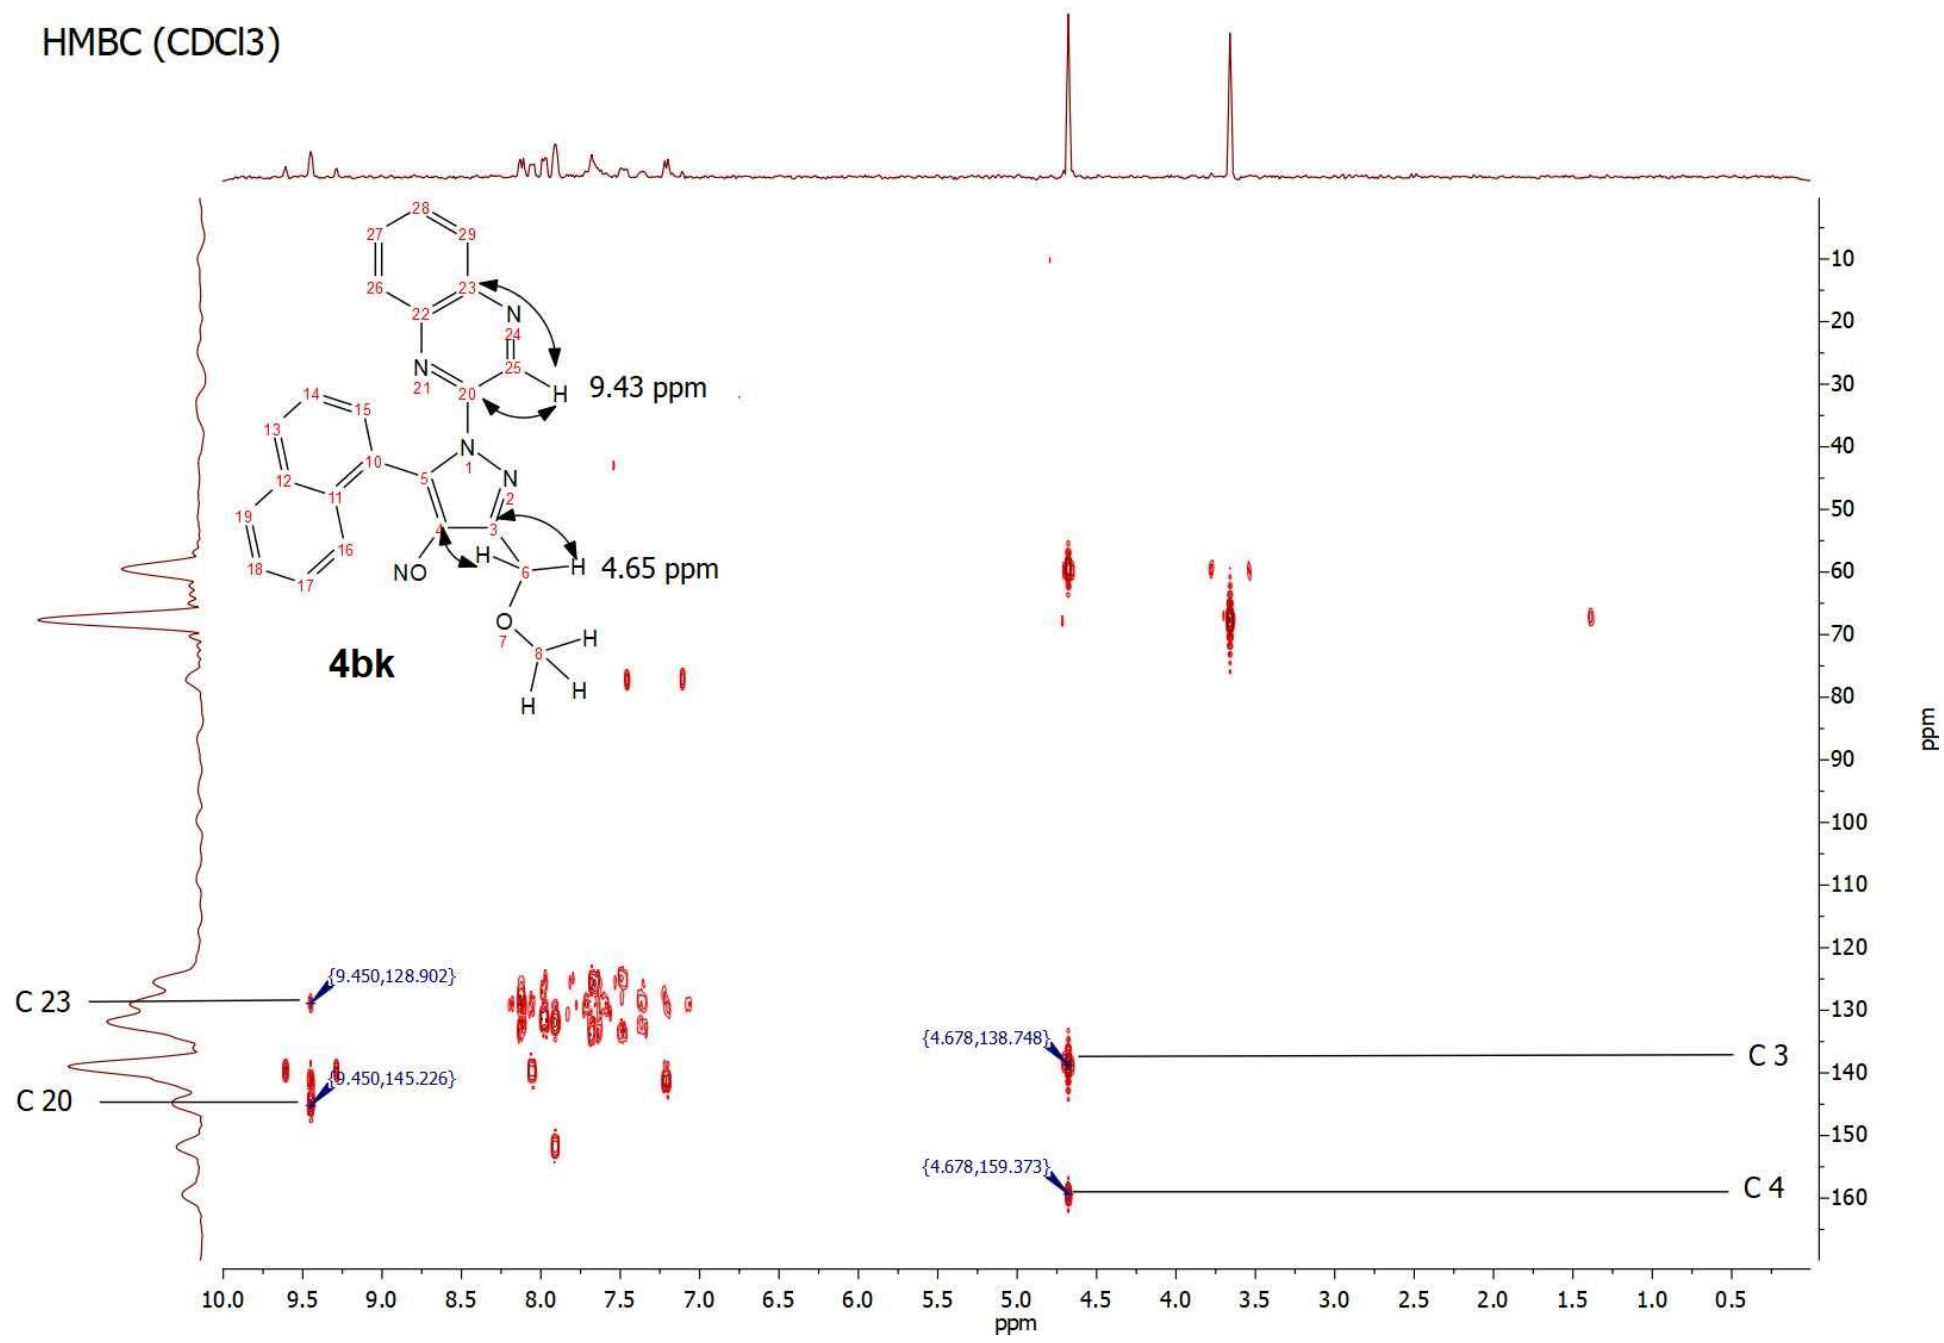



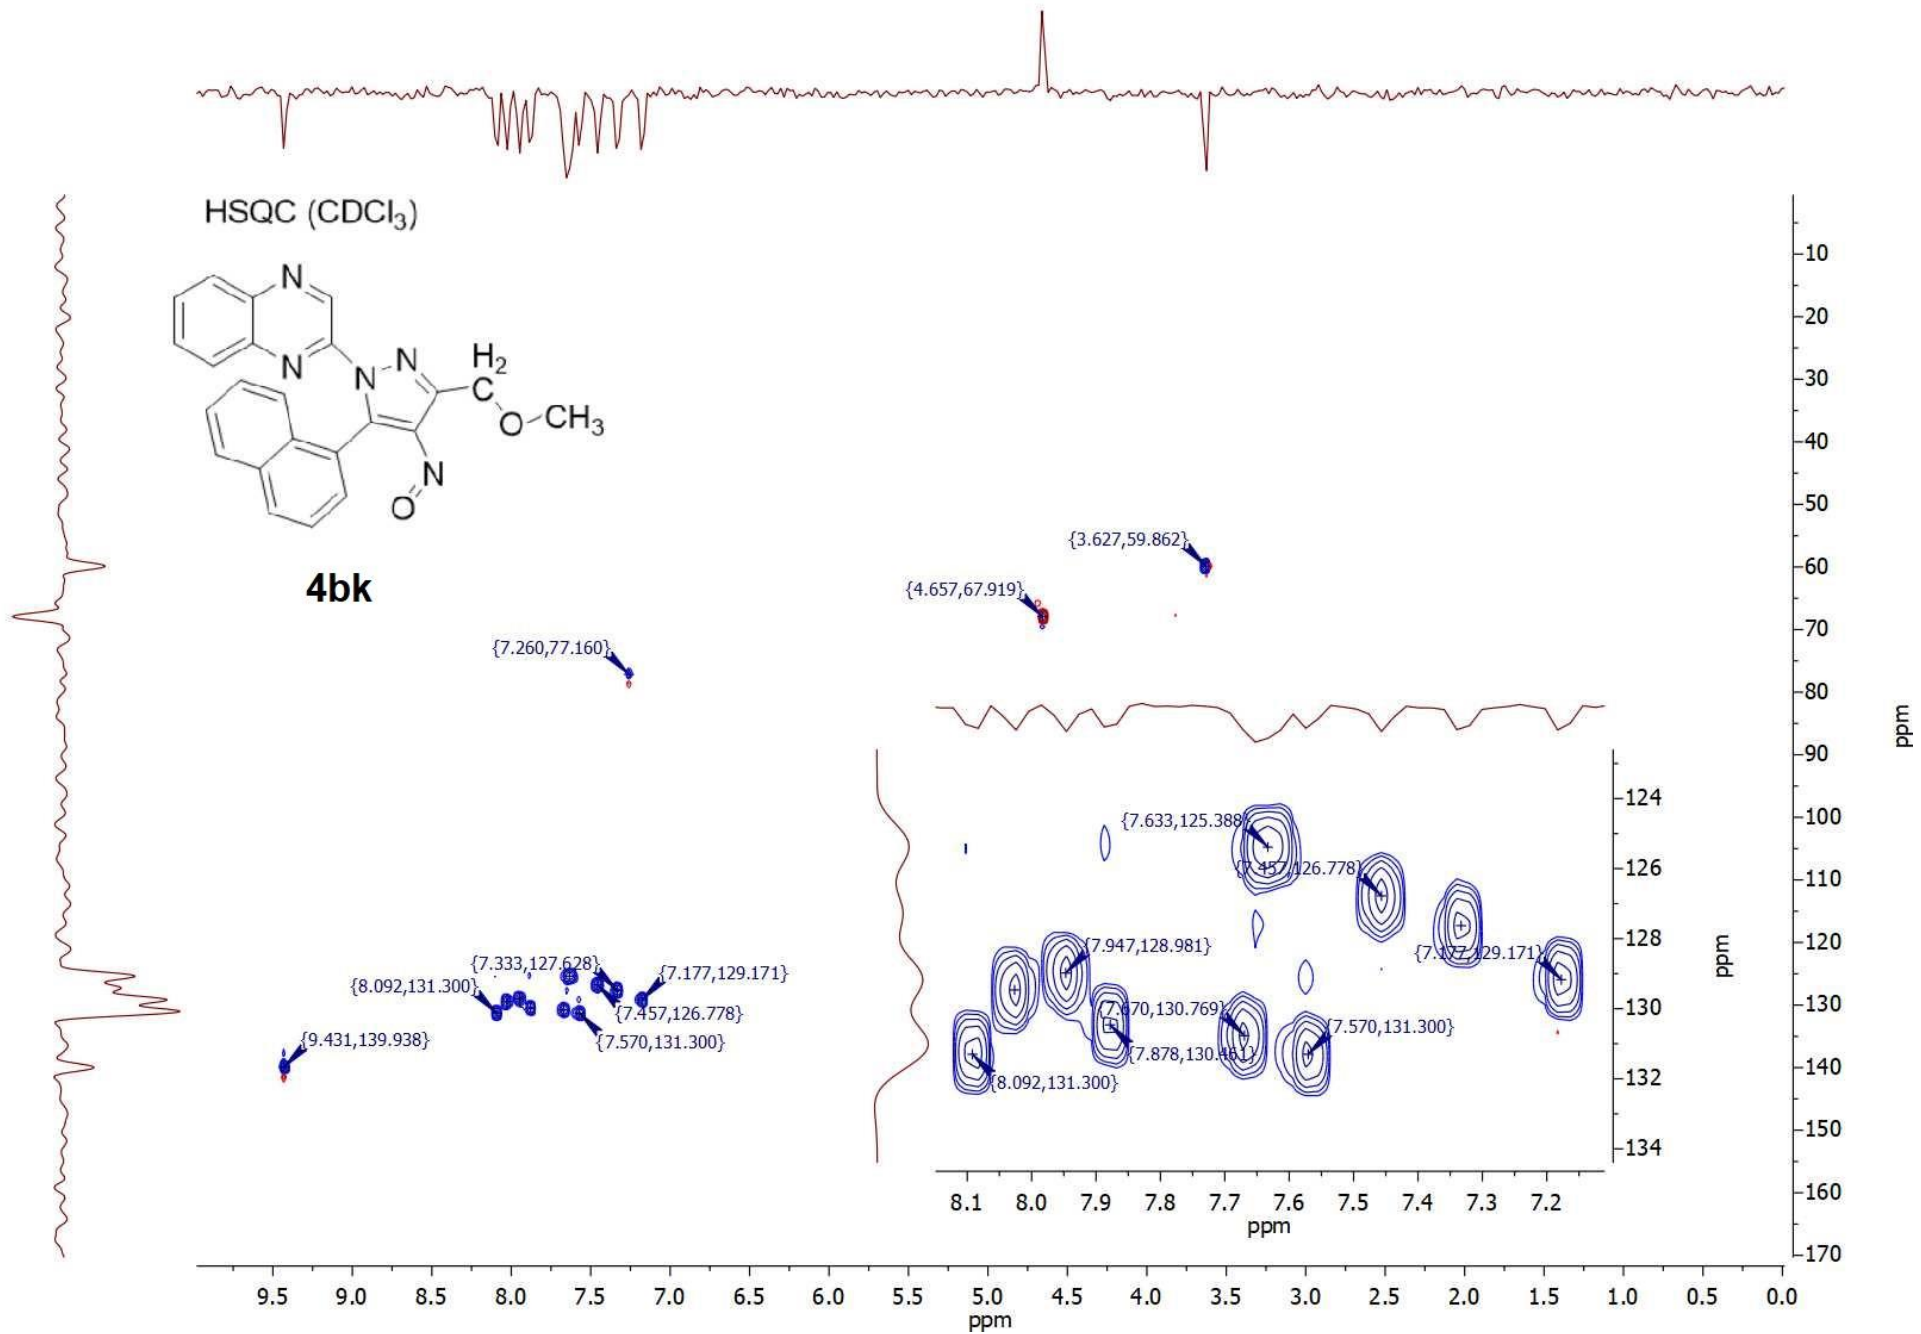



<sup>1</sup>H NMR (600 MHz, DMSO-d<sub>6</sub>)

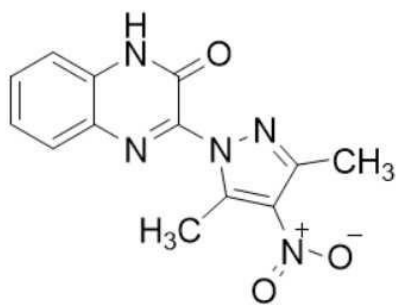

**5aa**

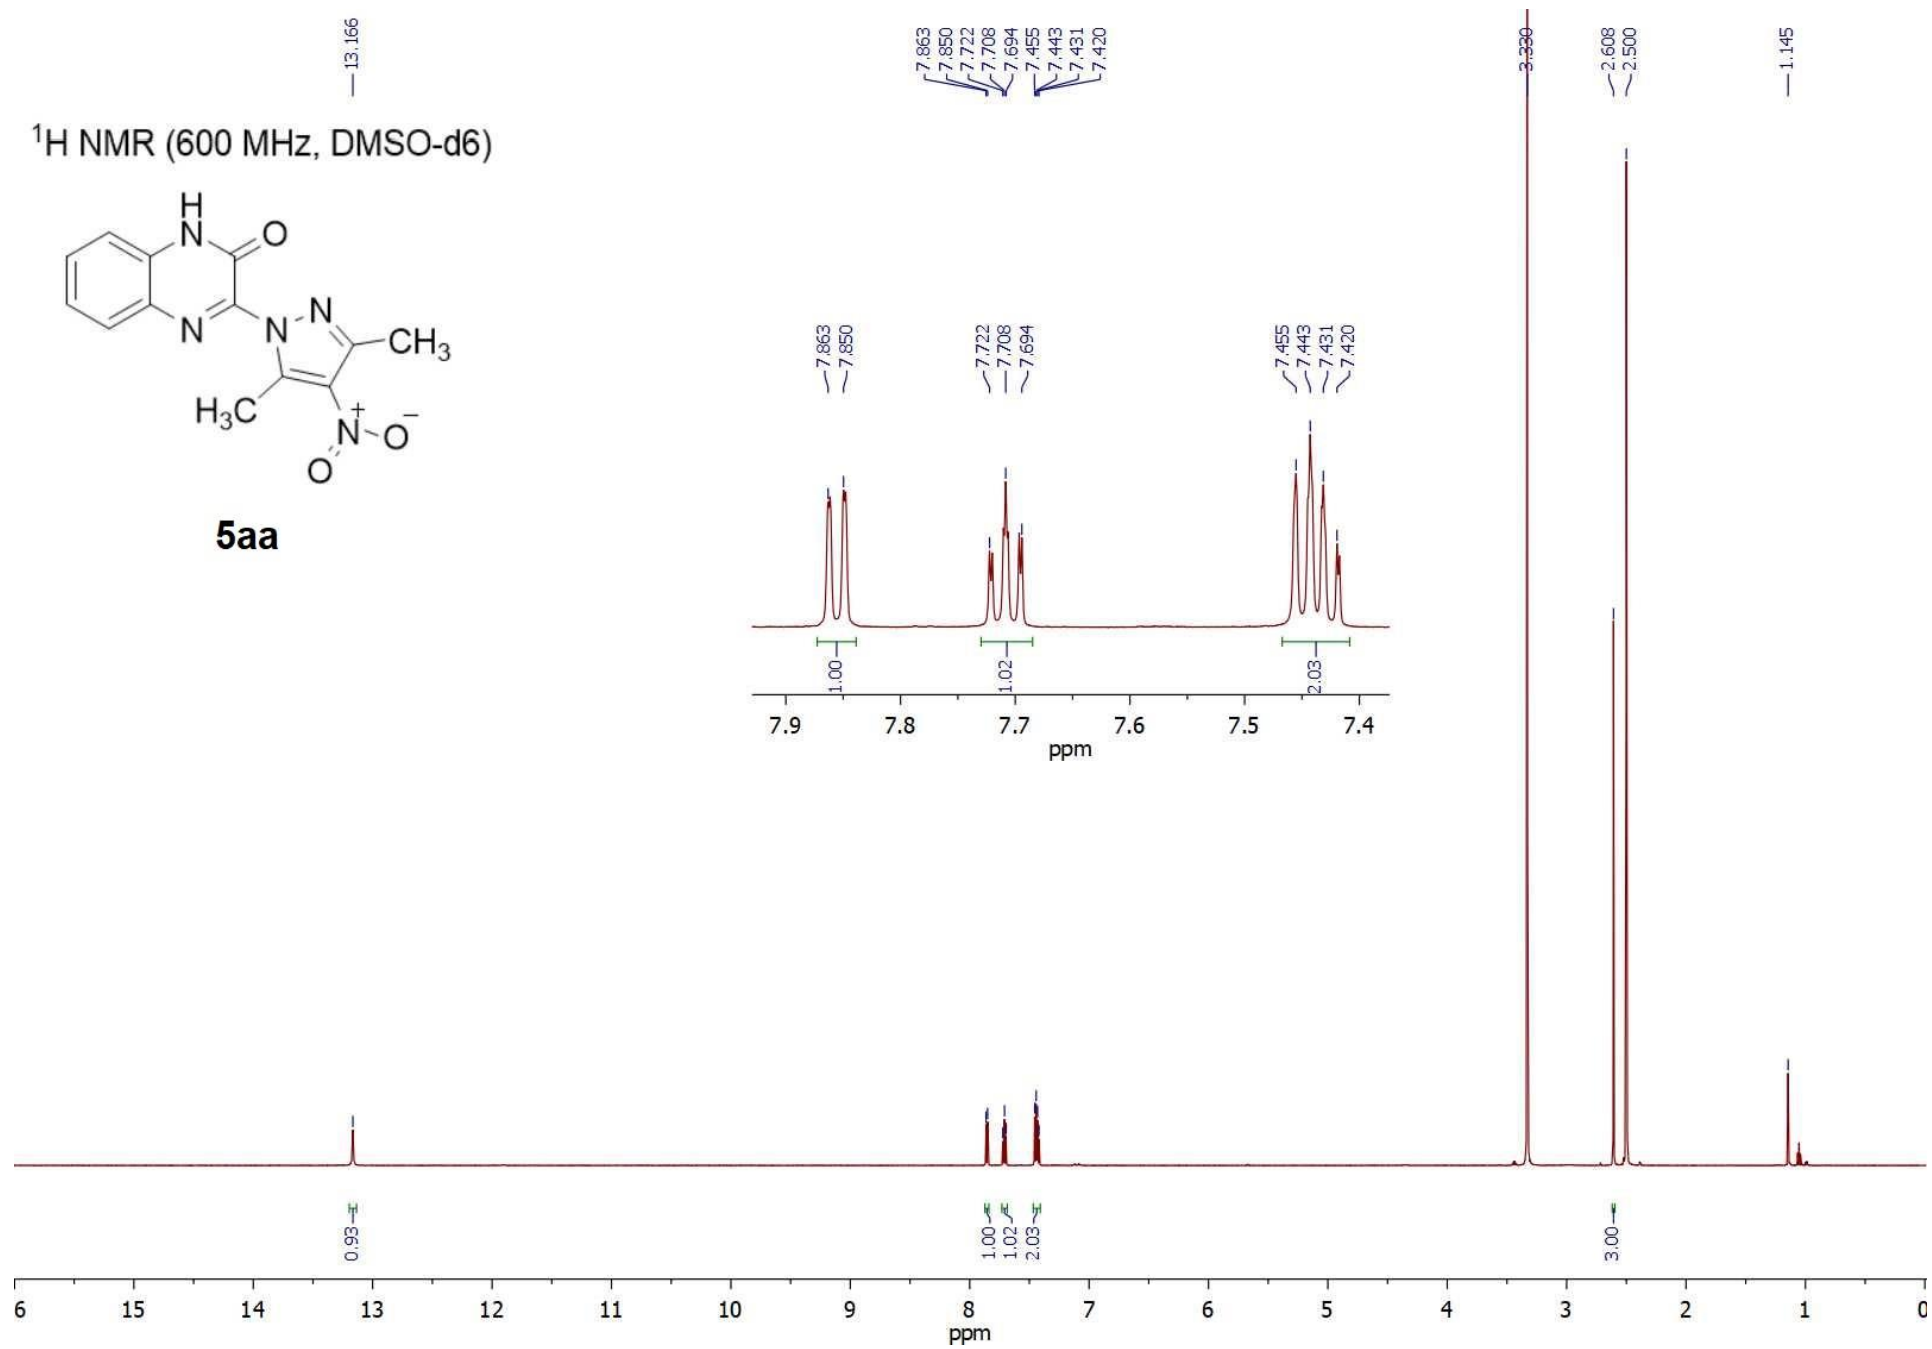

<sup>13</sup>C NMR (150 MHz, DMSO-d<sub>6</sub>)

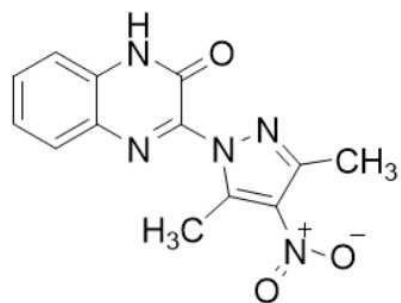

**5aa**

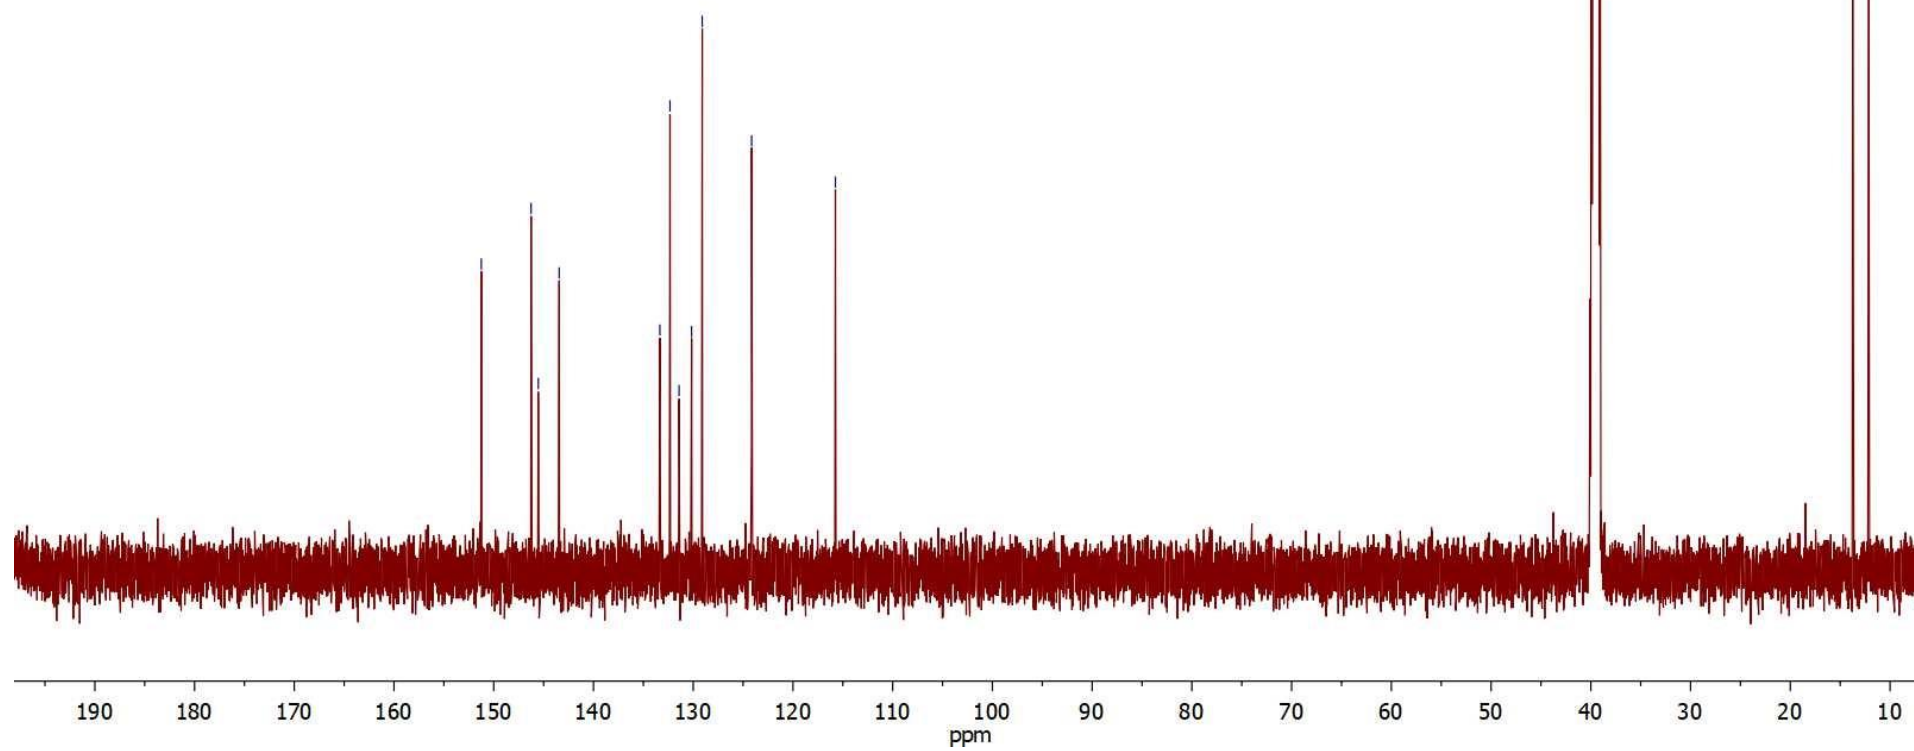

151.245  
146.253  
145.532  
143.438  
133.344  
132.327  
131.421  
130.162  
129.096  
124.141  
115.743

13.747  
12.130

# HSQC (DMSO-d6)

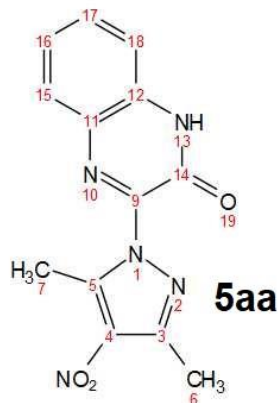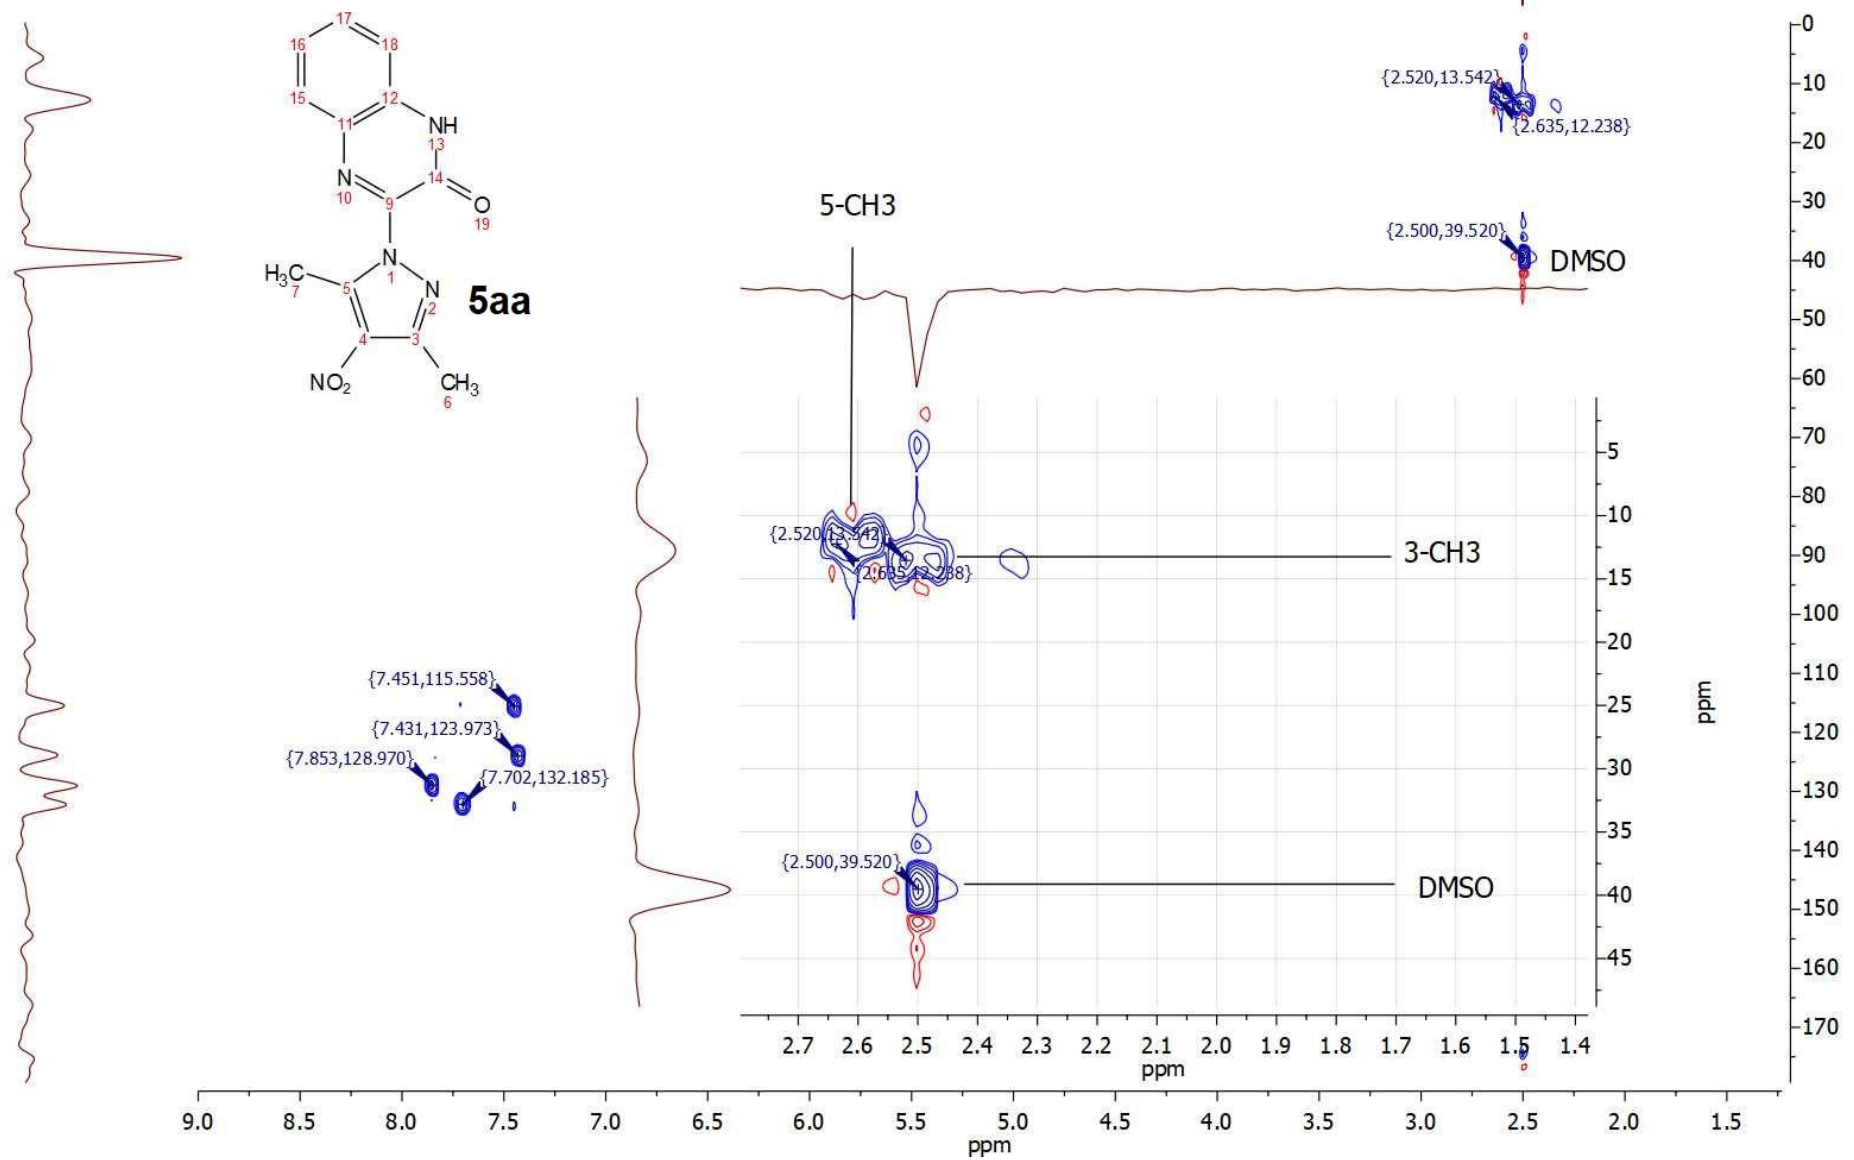

<sup>1</sup>H NMR (600 MHz, DMSO-d6)

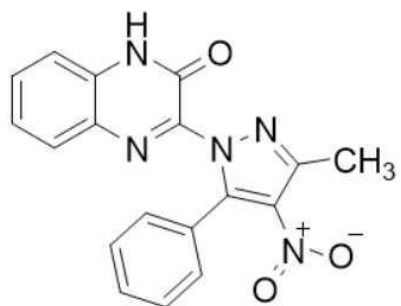

**5ab**

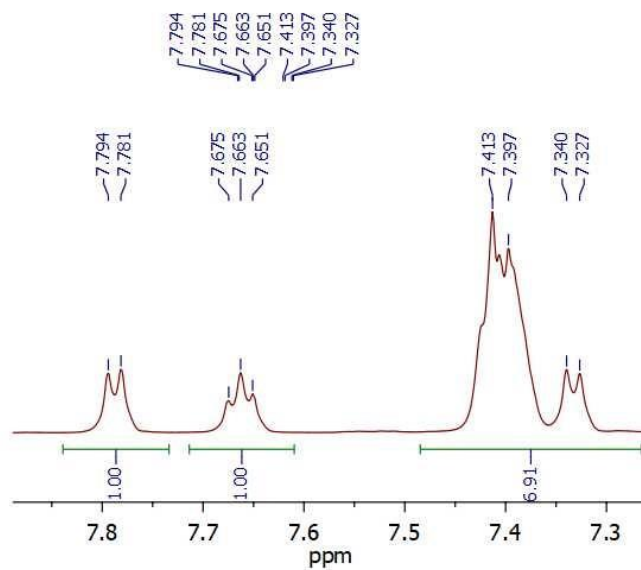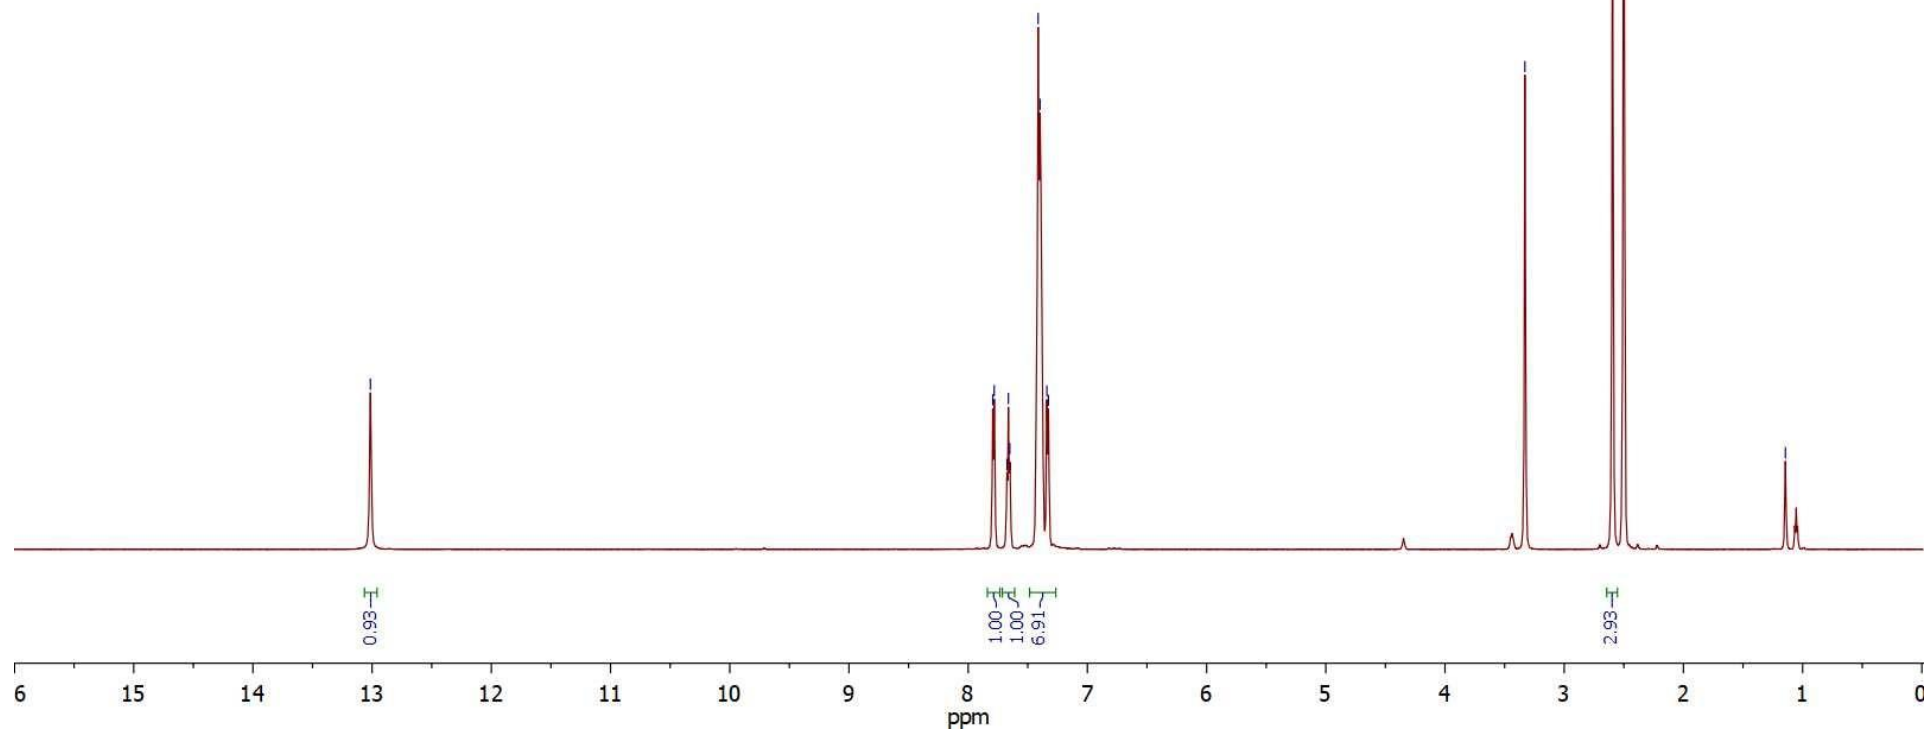

S-60

150.791  
146.834  
146.214  
143.795  
133.058  
132.714  
131.005  
130.187  
129.827  
129.791  
129.183  
128.231  
126.381  
124.388  
115.806

<sup>13</sup>C NMR (150 MHz, DMSO-d<sub>6</sub>)

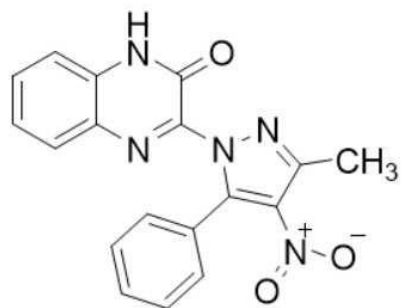

**5ab**

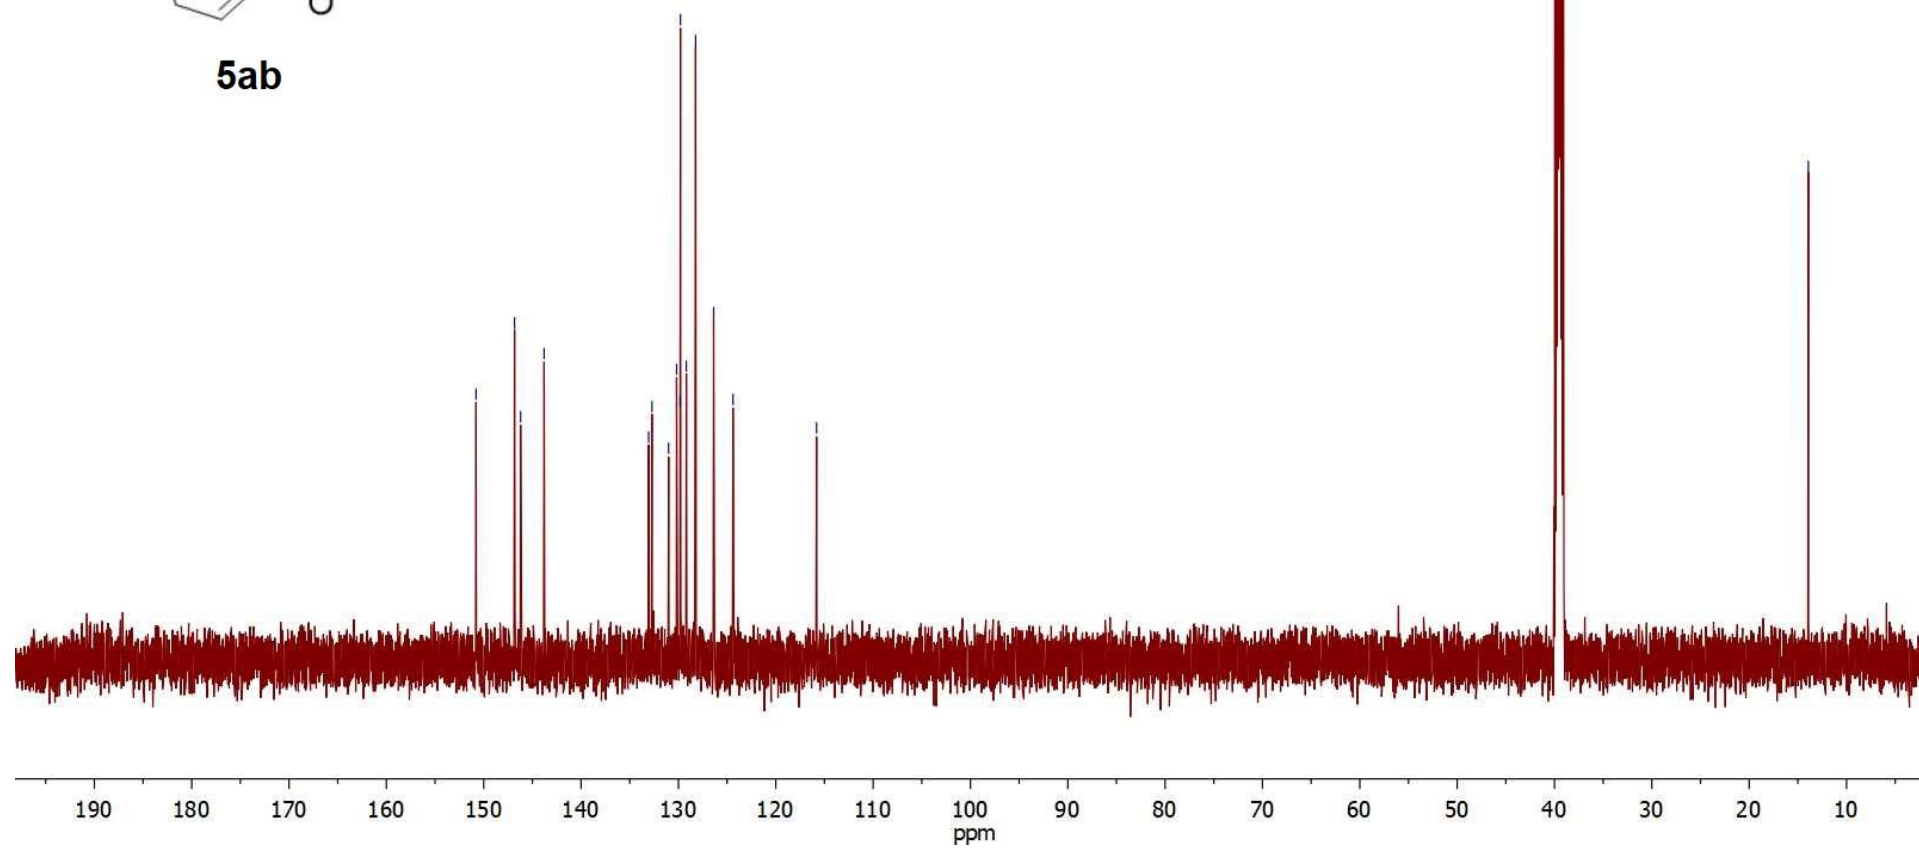

<sup>1</sup>H NMR (600 MHz, DMSO-d<sub>6</sub>)

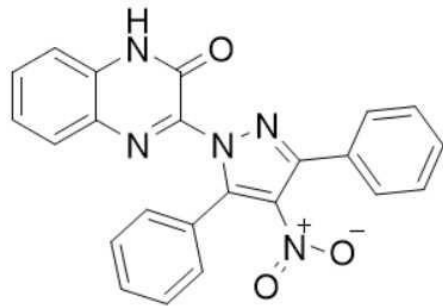

**5ai**

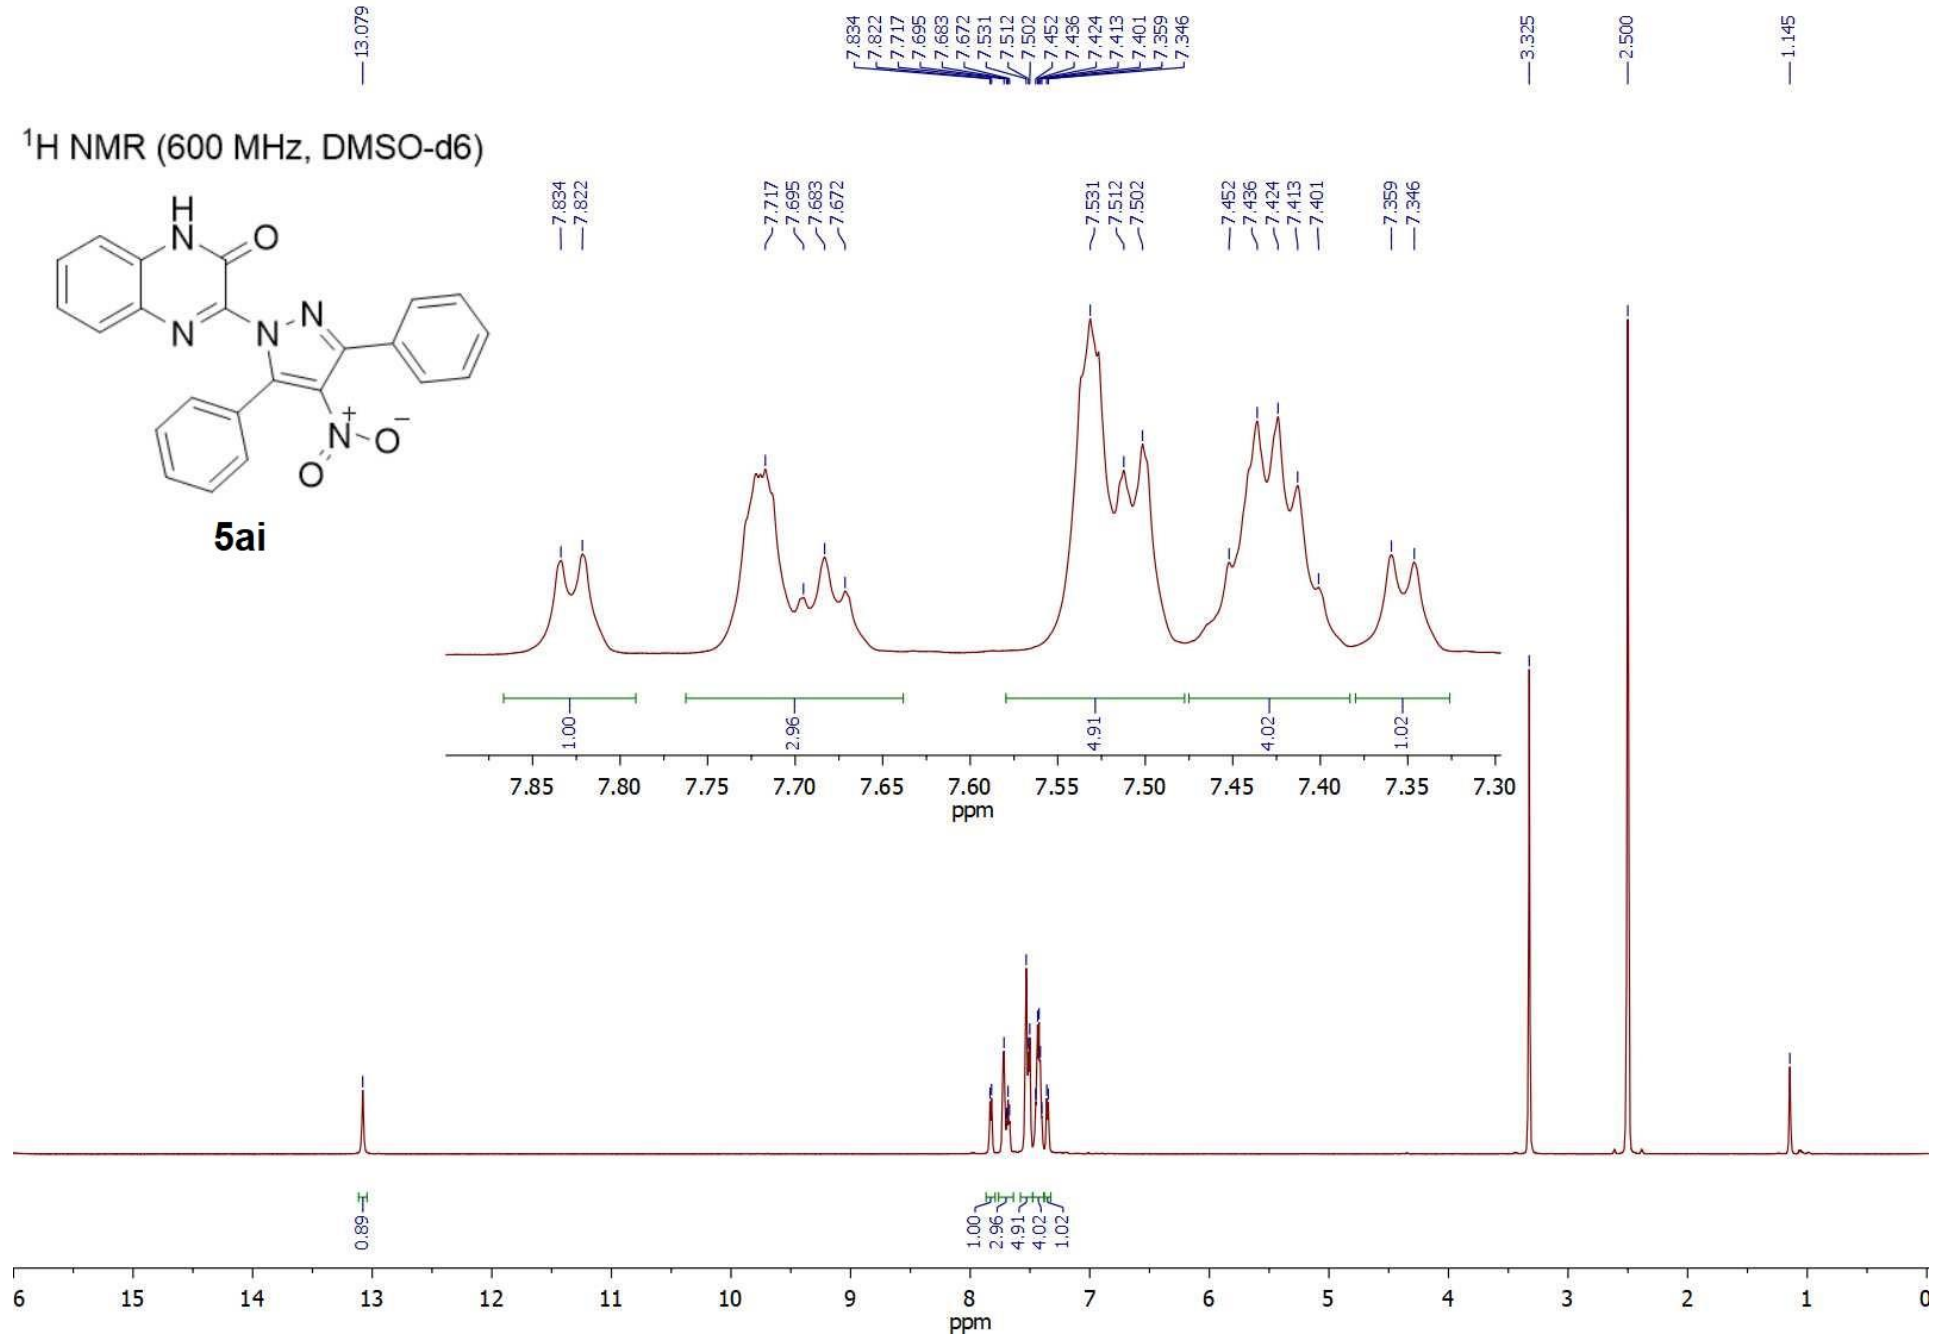

150.800  
147.987  
146.109  
144.148  
133.156  
132.855  
130.480  
130.391  
129.942  
129.840  
129.510  
129.248  
128.981  
128.366  
126.036  
124.459  
— 115.865

$^{13}\text{C}$  NMR (150 MHz, DMSO-d<sub>6</sub>)

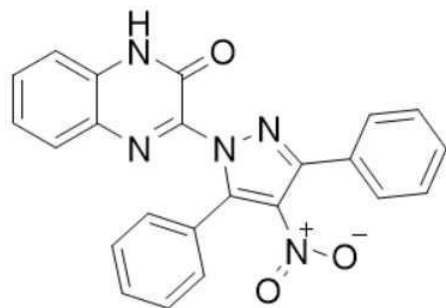

**5ai**

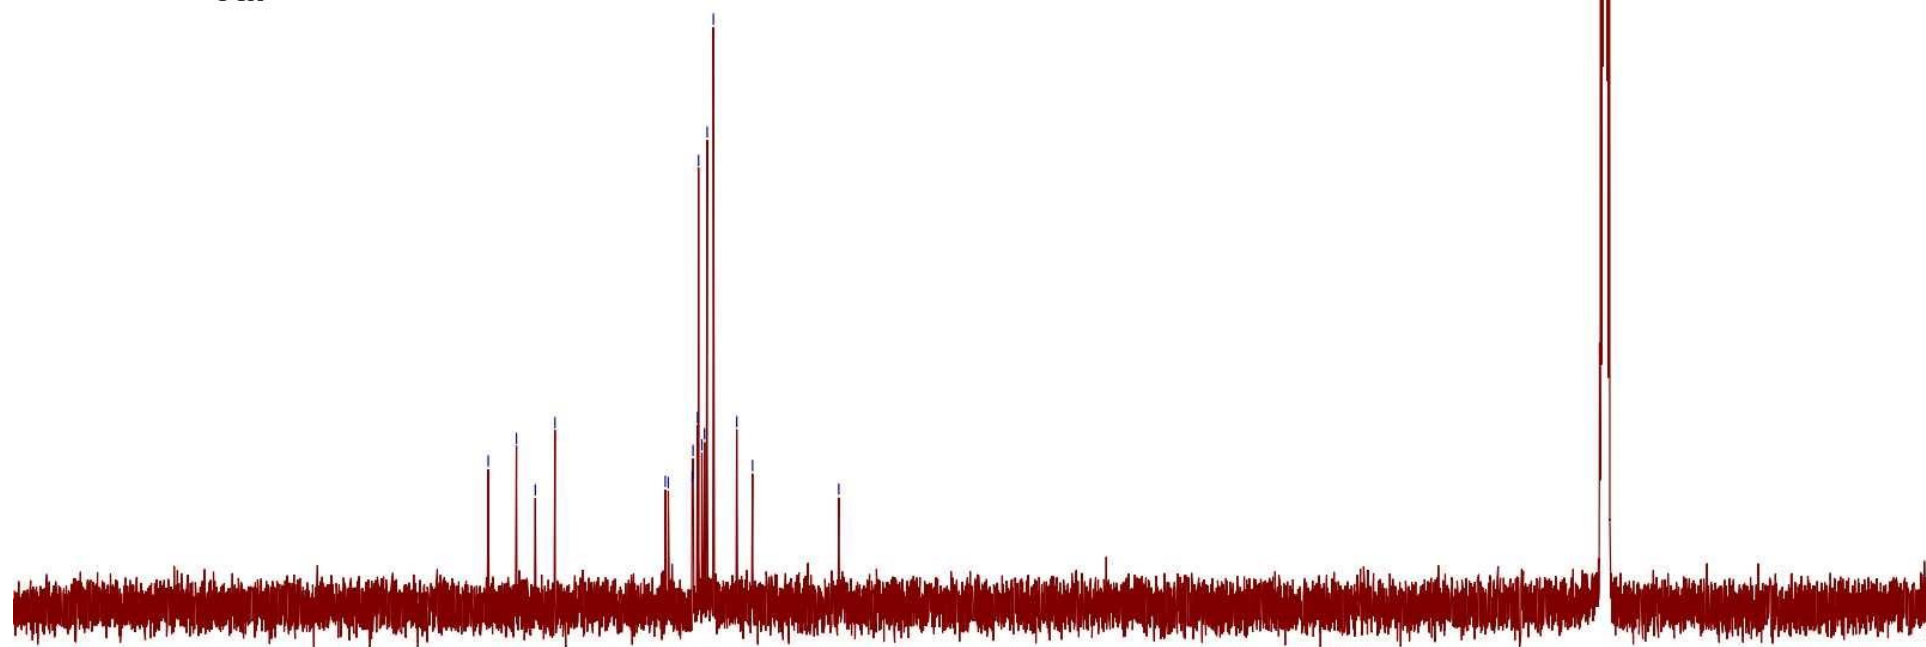

190 180 170 160 150 140 130 120 110 100 90 80 70 60 50 40 30 20 10

ppm  
S-63

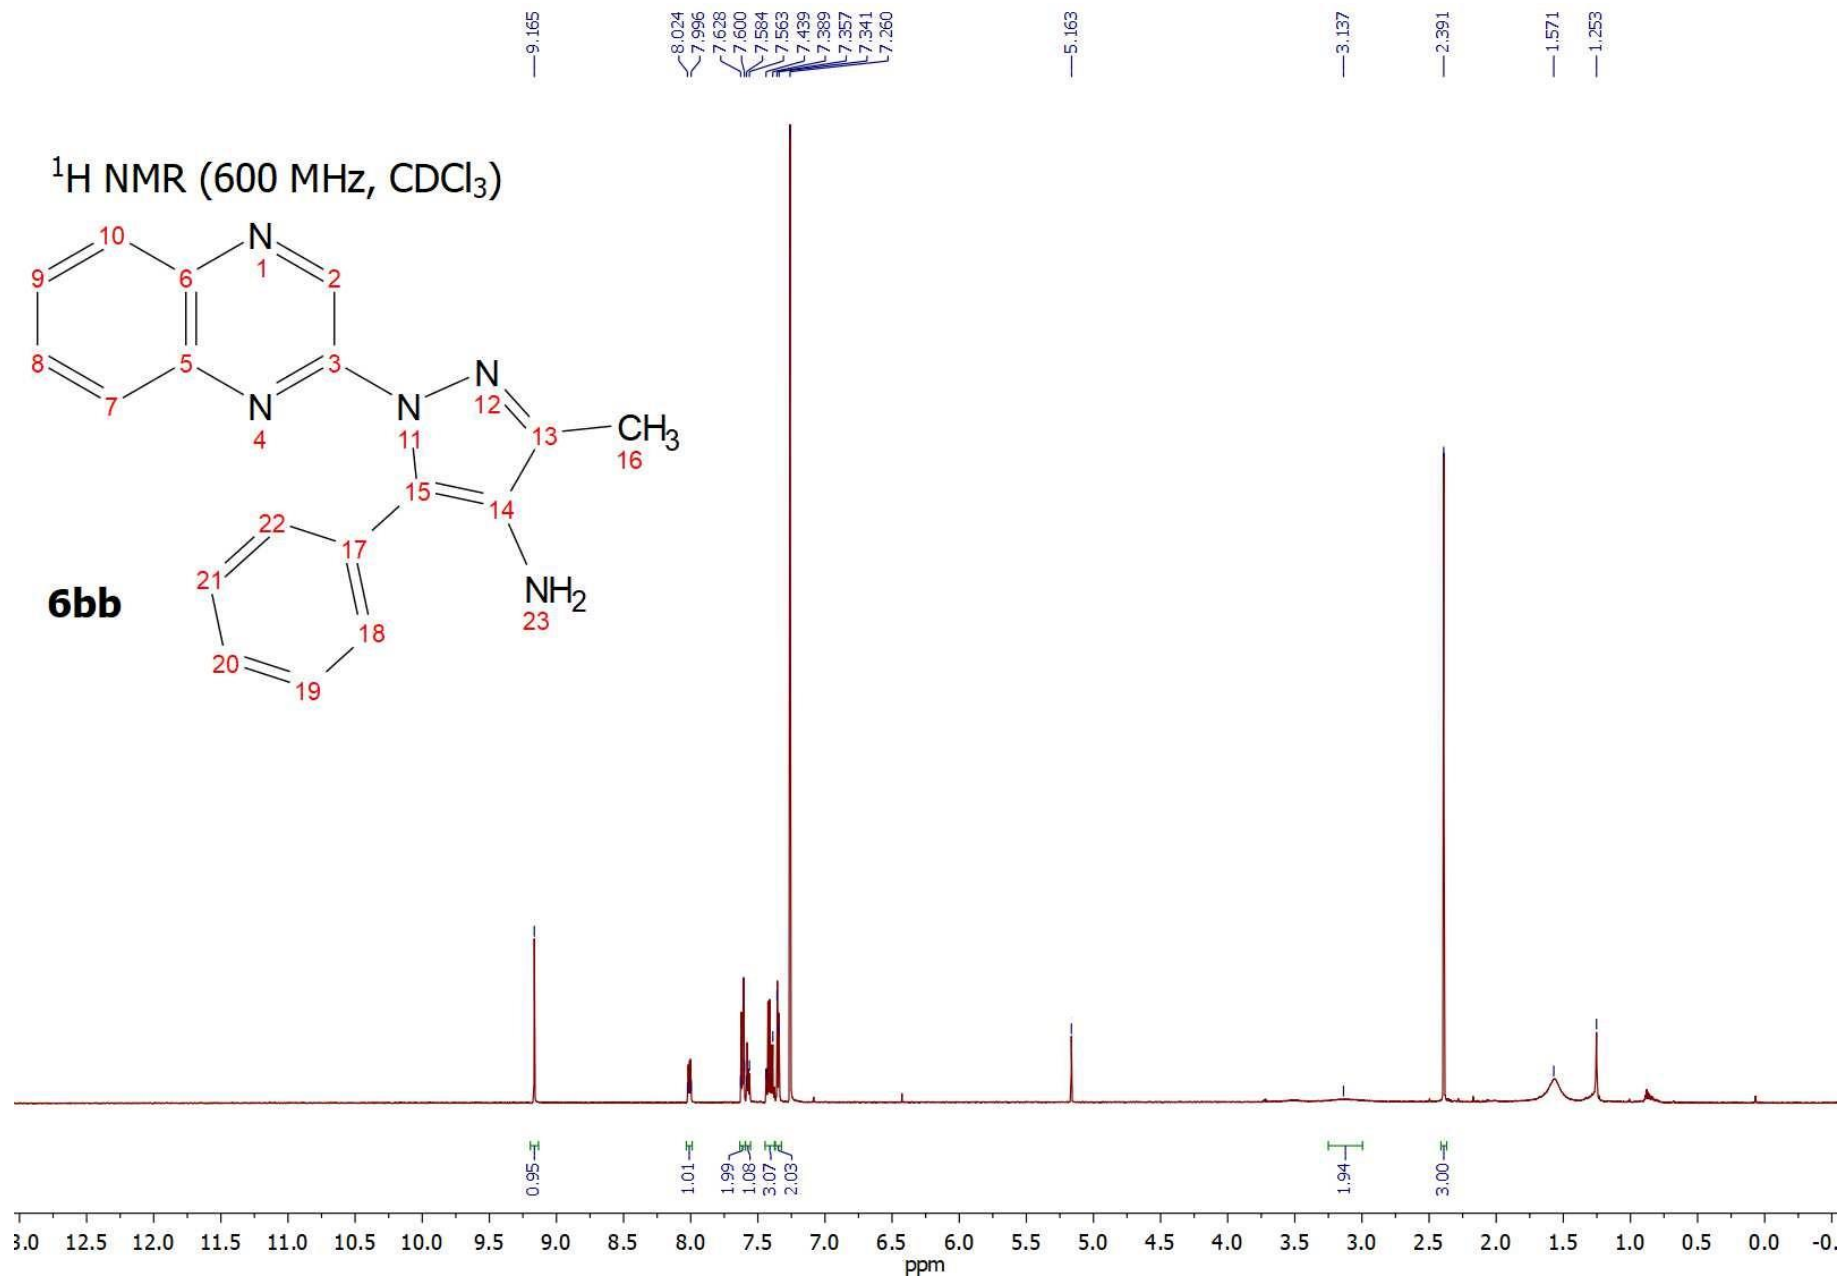



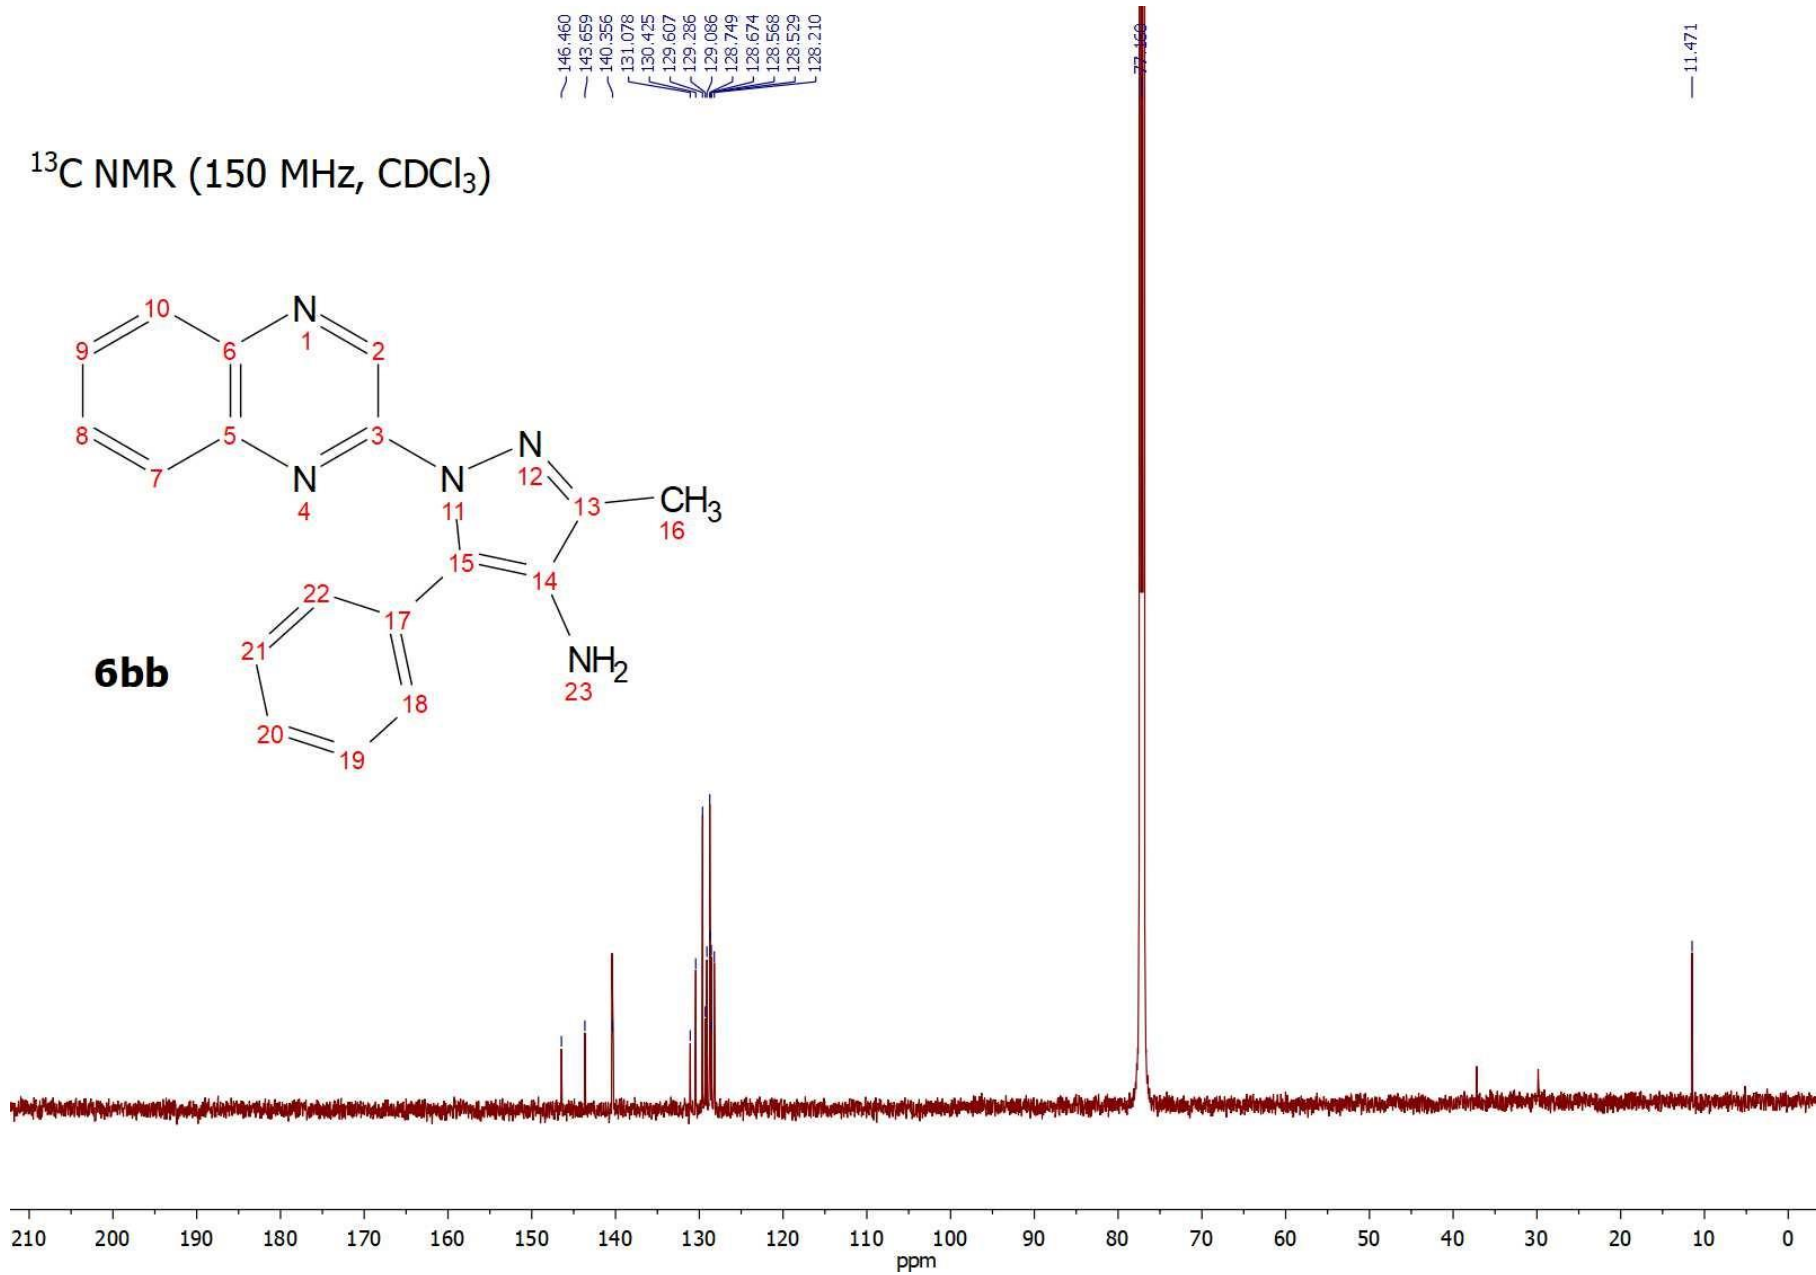

$^1\text{H}$ - $^{15}\text{N}$  HMBC ( $\text{CDCl}_3$ )

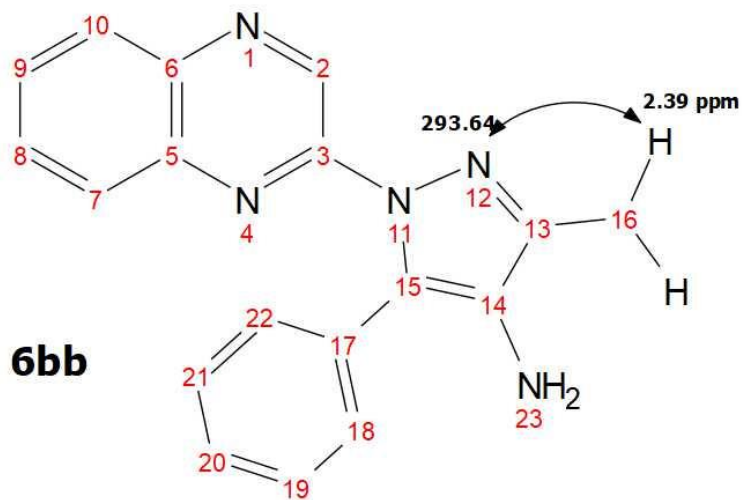

{2.413, 293.642}

ppm

8.0 7.5 7.0 6.5 6.0 5.5 5.0 4.5 4.0 3.5 3.0 2.5 2.0 1.5 1.0 0.5 0.0

## X-Ray crystallography data

The crystal structure data of **4ab** was deposited in CSD (Deposition Number 2224867).

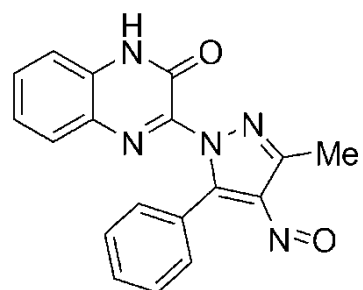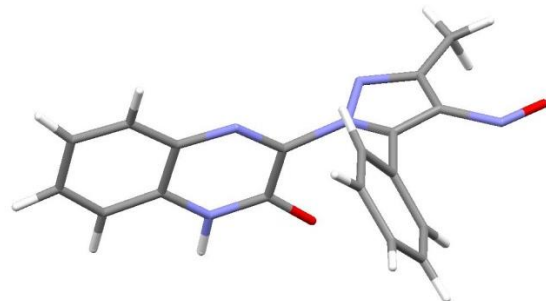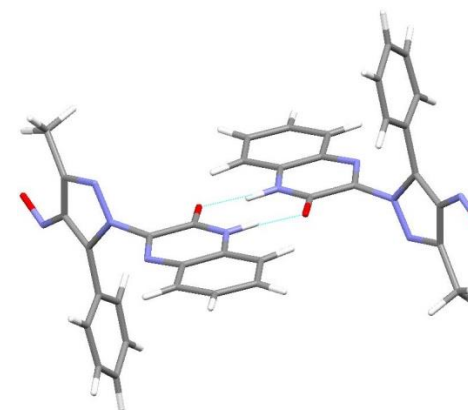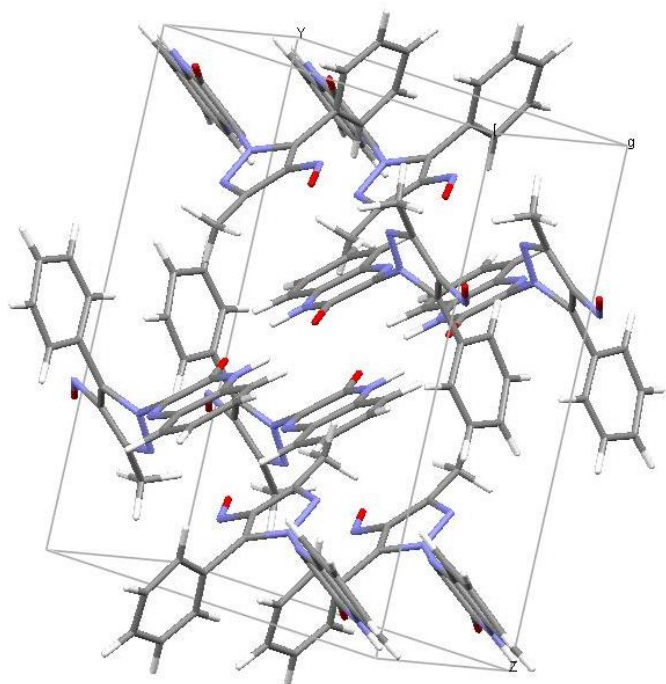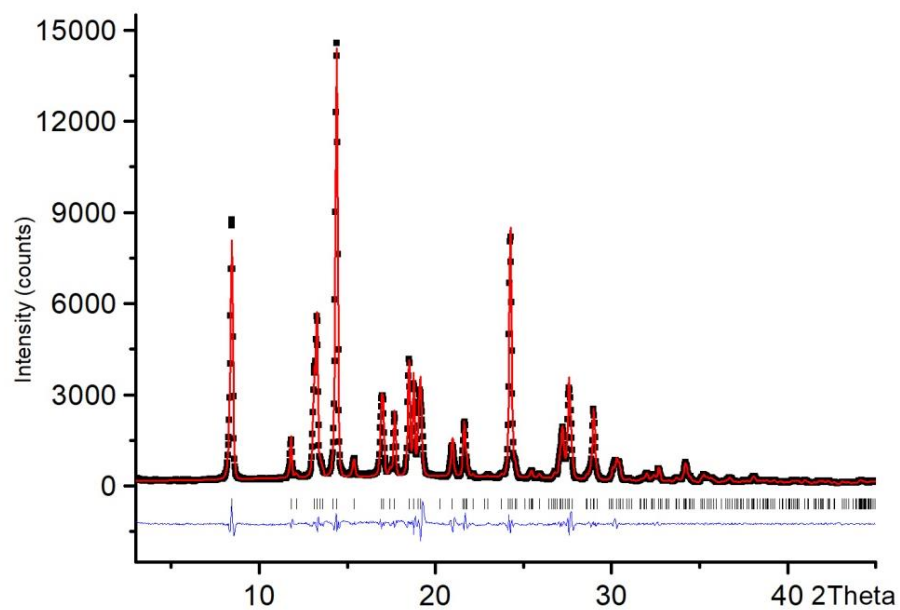

"Rietveld-plot" for **4ab**

Crystallographic parameters and experimental details of X-ray powder diffraction crystal structure investigation for **4ab**

|                                     |                                            |
|-------------------------------------|--------------------------------------------|
| Chemical formula                    | $C_{18}H_{13}N_5O_2$ ( <b>4ab</b> )        |
| Molecular weight                    | <b>331.33</b>                              |
| Space group                         | P 21/a                                     |
| $a, \text{Å}$                       | 15.7306(9)                                 |
| $b, \text{Å}$                       | 14.9839(8)                                 |
| $c, \text{Å}$                       | 7.2686(5)                                  |
| $\alpha, (^{\circ})$                | 90.0                                       |
| $\beta, (^{\circ})$                 | 111.748(8)                                 |
| $\gamma, (^{\circ})$                | 90.0                                       |
| $V_{un.cell}, \text{Å}^3$           | 1590.254                                   |
| Z                                   | 4                                          |
| $V/Z, \text{Å}^3$                   | 397.5                                      |
| $\rho_{calc}, \text{g/cm}^3$        | 1.384                                      |
| MAC $\mu/\rho$                      | 0.779                                      |
| T, K                                | 295                                        |
| Diffractometer                      | X'PertPRO                                  |
| Radiation                           | CuK $\alpha$                               |
| $\lambda, \text{Å}$                 | $\lambda_1 = 1.54056, \lambda_2 = 1.54439$ |
| Scanning area, $2\theta (^{\circ})$ | 3.0–90.9                                   |
| Number of Reflections               | 105                                        |
| $R_p, \%$                           | 7.6%                                       |
| $R_{wp}, \%$                        | 9.5%                                       |
| $R_{exp}, \%$                       | 4.7%                                       |
| $S = R_{wp}/R_{exp}$                | 2.02                                       |

The X-ray structural study was carried out by X-ray powder diffraction approach. This method does not allow creating a table of structural factors. In accordance with the accepted agreement IUCr, the reliability of the solution found is estimated by the correspondence between the experimental and calculated X-ray powder patterns (Rietveld-plot is given in the article) and the analysis of the crystal structure based on the software "PLATON " (CheckCif protocol).

## checkCIF/PLATON report

You have not supplied any structure factors. As a result the full set of tests cannot be run.

THIS REPORT IS FOR GUIDANCE ONLY. IF USED AS PART OF A REVIEW PROCEDURE FOR PUBLICATION, IT SHOULD NOT REPLACE THE EXPERTISE OF AN EXPERIENCED CRYSTALLOGRAPHIC REFEREE.

No syntax errors found.      CIF dictionary      Interpreting this report

### Datablock: C18H13N5O2

---

Bond precision:    C-C = 0.0140 Å                      Wavelength=1.54184

Cell:                      a=15.7306 (9)              b=14.9839 (8)              c=7.2686 (5)  
                                    alpha=90                      beta=111.748 (8)              gamma=90

Temperature:              295 K

|                        | Calculated    | Reported      |
|------------------------|---------------|---------------|
| Volume                 | 1591.31 (19)  | 1591          |
| Space group            | P 21/a        | P 1 21/a 1    |
| Hall group             | -P 2yab       | -P 2yab       |
| Moiety formula         | C18 H13 N5 O2 | ?             |
| Sum formula            | C18 H13 N5 O2 | C18 H13 N5 O2 |
| Mr                     | 331.33        | 331.33        |
| Dx, g cm <sup>-3</sup> | 1.383         | 1.383         |
| Z                      | 4             | 4             |
| Mu (mm <sup>-1</sup> ) | 0.779         | 0.779         |
| F000                   | 688.0         | 688.0         |
| F000'                  | 690.15        |               |
| h, k, lmax             | 14, 13, 6     |               |
| Nref                   | 1317          |               |
| Tmin, Tmax             |               |               |
| Tmin'                  |               |               |

Correction method= Not given

Data completeness= 0.000                      Theta (max) =

R(reflections)=                                              wR2(reflections)=  
S =                                              Npar=

---

The following ALERTS were generated. Each ALERT has the format

**test-name\_ALERT\_alert-type\_alert-level.**

Click on the hyperlinks for more details of the test.

---

**Alert level B**

PLAT340\_ALERT\_3\_B Low Bond Precision on C-C Bonds ..... 0.014 Ang.

---

**Alert level C**

SHFSU01\_ALERT\_2\_C The absolute value of parameter shift to su ratio > 0.05  
Absolute value of the parameter shift to su ratio given 0.100  
Additional refinement cycles may be required.

PLAT048\_ALERT\_1\_C MoietyFormula Not Given (or Incomplete) ..... Please Check  
PLAT080\_ALERT\_2\_C Maximum Shift/Error ..... 0.10 Why ?  
PLAT151\_ALERT\_1\_C No s.u. (esd) Given on Volume ..... Please Do !  
PLAT369\_ALERT\_2\_C Long C(sp<sup>2</sup>)-C(sp<sup>2</sup>) Bond C12 - C18 . 1.55 Ang.  
PLAT762\_ALERT\_1\_C CIF Contains no X-Y-H or H-Y-H Angles ..... Please Check

---

**Alert level G**

PLAT128\_ALERT\_4\_G Alternate Setting for Input Space Group P21/a P21/n Note  
PLAT432\_ALERT\_2\_G Short Inter X...Y Contact O24 ..C21 . 2.98 Ang.  
1-x,-y,1-z = 3\_656 Check  
PLAT432\_ALERT\_2\_G Short Inter X...Y Contact N15 ..C22 . 2.91 Ang.  
1-x,-y,1-z = 3\_656 Check  
PLAT432\_ALERT\_2\_G Short Inter X...Y Contact C3 ..C25 . 3.02 Ang.  
1/2+x,1/2-y,z = 4\_555 Check  
PLAT432\_ALERT\_2\_G Short Inter X...Y Contact C3 ..C14 . 3.07 Ang.  
1/2+x,1/2-y,z = 4\_555 Check  
PLAT769\_ALERT\_4\_G CIF Embedded explicitly supplied scattering data Please Note  
PLAT860\_ALERT\_3\_G Number of Least-Squares Restraints ..... 20 Note  
PLAT982\_ALERT\_1\_G The C-f' = 0.0170 Deviates from IT-value = 0.0181 Check  
PLAT982\_ALERT\_1\_G The N-f' = 0.0290 Deviates from IT-value = 0.0311 Check

---

0 **ALERT level A** = Most likely a serious problem - resolve or explain  
1 **ALERT level B** = A potentially serious problem, consider carefully  
6 **ALERT level C** = Check. Ensure it is not caused by an omission or oversight  
9 **ALERT level G** = General information/check it is not something unexpected

5 ALERT type 1 CIF construction/syntax error, inconsistent or missing data  
7 ALERT type 2 Indicator that the structure model may be wrong or deficient  
2 ALERT type 3 Indicator that the structure quality may be low  
2 ALERT type 4 Improvement, methodology, query or suggestion  
0 ALERT type 5 Informative message, check

---

It is advisable to attempt to resolve as many as possible of the alerts in all categories. Often the minor alerts point to easily fixed oversights, errors and omissions in your CIF or refinement strategy, so attention to these fine details can be worthwhile. In order to resolve some of the more serious problems it may be necessary to carry out additional measurements or structure refinements. However, the purpose of your study may justify the reported deviations and the more serious of these should normally be commented upon in the discussion or experimental section of a paper or in the "special\_details" fields of the CIF. checkCIF was carefully designed to identify outliers and unusual parameters, but every test has its limitations and alerts that are not important in a particular case may appear. Conversely, the absence of alerts does not guarantee there are no aspects of the results needing attention. It is up to the individual to critically assess their own results and, if necessary, seek expert advice.

### **Publication of your CIF in IUCr journals**

A basic structural check has been run on your CIF. These basic checks will be run on all CIFs submitted for publication in IUCr journals (*Acta Crystallographica*, *Journal of Applied Crystallography*, *Journal of Synchrotron Radiation*); however, if you intend to submit to *Acta Crystallographica Section C* or *E* or *IUCrData*, you should make sure that full publication checks are run on the final version of your CIF prior to submission.

### **Publication of your CIF in other journals**

Please refer to the *Notes for Authors* of the relevant journal for any special instructions relating to CIF submission.

---

**PLATON version of 28/11/2022; check.def file version of 28/11/2022**

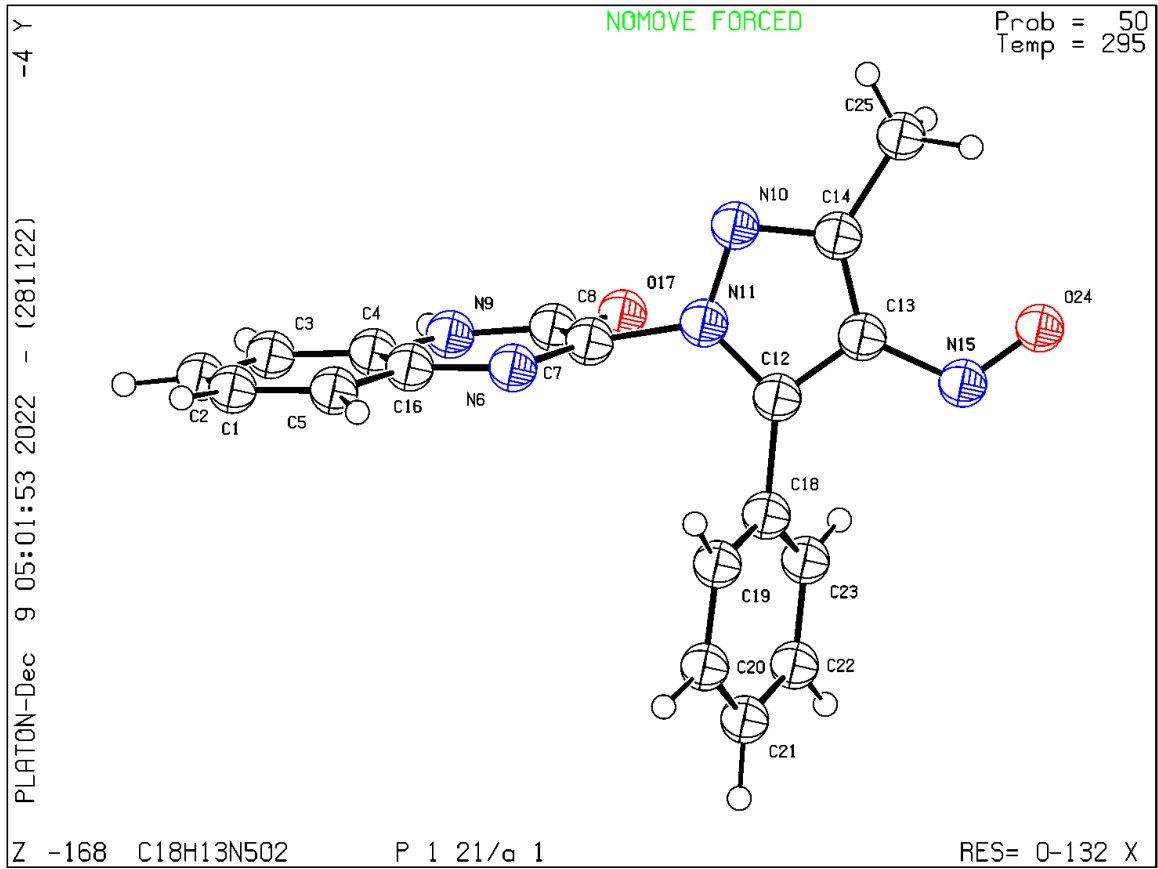

Supplement: d3ob00356f1.pdf [file d3ob00356f1.pdf]
